# Supplementary material for: Divergent reactivity of α-azidochalcones with metal β-diketonates: tunable synthesis of substituted pyrroles and indoles
Source: Royal Society of Chemistry journal article supplement (doi:10.1039/c6qo00541a), 2016-10-25
Supplement: c6qo00541a1.pdf [file c6qo00541a1.pdf]

## Supporting Information

### Divergent Reactivity of $\alpha$ -azidochalcones with Metal $\beta$ -Diketonates: Tunable Synthesis of Substituted Pyrroles and Indoles

Kandasamy Rajaguru,<sup>a</sup> Arumugam Mariappan,<sup>a</sup> Shanmugam Muthusubramanian,<sup>\*a</sup> and Nattamai Bhuvanesh<sup>b</sup>

<sup>a</sup> *Department of Organic Chemistry, School of Chemistry, Madurai Kamaraj University,*

*Madurai - 625 021, India*

<sup>b</sup> *X-ray Diffraction Laboratory, Department of Chemistry, Texas A & M University,*

*College Station, Texas 77842, USA*

*e-mail: [muthumanian2001@yahoo.com](mailto:muthumanian2001@yahoo.com)*

**Table of contents****Page No**

---

|                                                                    |     |
|--------------------------------------------------------------------|-----|
| Characterization of compounds <b>2</b> and <b>3</b>                | S4  |
| <sup>1</sup> H & <sup>13</sup> C NMR spectra of compound <b>2a</b> | S15 |
| <sup>1</sup> H & <sup>13</sup> C NMR spectra of compound <b>2b</b> | S17 |
| <sup>1</sup> H & <sup>13</sup> C NMR spectra of compound <b>2c</b> | S19 |
| <sup>1</sup> H & <sup>13</sup> C NMR spectra of compound <b>2d</b> | S21 |
| <sup>1</sup> H & <sup>13</sup> C NMR spectra of compound <b>2e</b> | S23 |
| <sup>1</sup> H & <sup>13</sup> C NMR spectra of compound <b>2f</b> | S25 |
| <sup>1</sup> H & <sup>13</sup> C NMR spectra of compound <b>2g</b> | S27 |
| <sup>1</sup> H & <sup>13</sup> C NMR spectra of compound <b>2h</b> | S29 |
| <sup>1</sup> H & <sup>13</sup> C NMR spectra of compound <b>2i</b> | S31 |
| <sup>1</sup> H & <sup>13</sup> C NMR spectra of compound <b>2j</b> | S33 |
| <sup>1</sup> H & <sup>13</sup> C NMR spectra of compound <b>2k</b> | S35 |
| <sup>1</sup> H & <sup>13</sup> C NMR spectra of compound <b>2l</b> | S37 |
| <sup>1</sup> H & <sup>13</sup> C NMR spectra of compound <b>2m</b> | S39 |
| <sup>1</sup> H & <sup>13</sup> C NMR spectra of compound <b>2n</b> | S41 |
| <sup>1</sup> H & <sup>13</sup> C NMR spectra of compound <b>2o</b> | S43 |
| <sup>1</sup> H & <sup>13</sup> C NMR spectra of compound <b>3a</b> | S45 |
| <sup>1</sup> H & <sup>13</sup> C NMR spectra of compound <b>3b</b> | S47 |
| <sup>1</sup> H & <sup>13</sup> C NMR spectra of compound <b>3c</b> | S49 |
| <sup>1</sup> H & <sup>13</sup> C NMR spectra of compound <b>3d</b> | S51 |
| <sup>1</sup> H & <sup>13</sup> C NMR spectra of compound <b>3e</b> | S53 |
| <sup>1</sup> H & <sup>13</sup> C NMR spectra of compound <b>3f</b> | S55 |

|                                                                  |     |
|------------------------------------------------------------------|-----|
| $^1\text{H}$ & $^{13}\text{C}$ NMR spectra of compound <b>3g</b> | S57 |
| $^1\text{H}$ & $^{13}\text{C}$ NMR spectra of compound <b>3h</b> | S59 |
| $^1\text{H}$ & $^{13}\text{C}$ NMR spectra of compound <b>3i</b> | S61 |
| $^1\text{H}$ & $^{13}\text{C}$ NMR spectra of compound <b>3j</b> | S63 |
| $^1\text{H}$ & $^{13}\text{C}$ NMR spectra of compound <b>3k</b> | S65 |
| $^1\text{H}$ & $^{13}\text{C}$ NMR spectra of compound <b>3l</b> | S67 |
| $^1\text{H}$ & $^{13}\text{C}$ NMR spectra of compound <b>3m</b> | S69 |
| $^1\text{H}$ & $^{13}\text{C}$ NMR spectra of compound <b>3n</b> | S71 |
| $^1\text{H}$ & $^{13}\text{C}$ NMR spectra of compound <b>3o</b> | S73 |
| $^1\text{H}$ & $^{13}\text{C}$ NMR spectra of compound <b>3p</b> | S75 |

## Characterisation data for compounds 2 and 3

### 1-(4-(4-Chlorobenzoyl)-5-(3,5-dimethoxyphenyl)-2-methyl-1H-pyrrol-3-yl)ethan-1-one (2a):

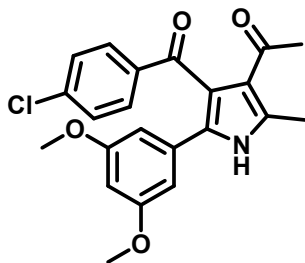

Isolated as white solid; mp: 201–202 °C; IR (KBr): 3195, 2842, 1689, 1644, 1421, 1089 cm<sup>-1</sup>; <sup>1</sup>H NMR (300 MHz, CDCl<sub>3</sub>) δ 10.44 (s, 1H), 7.99 (s, 1H), 7.73 (d, *J* = 8.5 Hz, 2H), 7.51 (s, 1H), 7.33 – 7.23 (m, 2H), 6.87 (s, 1H), 3.90 (s, 3H), 3.85 (s, 3H), 2.54 (s, 3H), 2.21 (s, 3H). <sup>13</sup>C NMR (75 MHz, CDCl<sub>3</sub>) δ 193.9, 192.9, 162.4, 151.8, 148.2, 140.2, 137.1, 135.4, 130.2, 128.1, 122.4, 120.1, 115.2, 107.4, 56.1, 55.9, 31.1, 13.8. ESI-MS *m/z* calcd for C<sub>22</sub>H<sub>20</sub>ClNO<sub>4</sub>: [M]<sup>+</sup> 397.85; Found: [M+H]<sup>+</sup> 398.44. Anal. Calcd for C<sub>22</sub>H<sub>20</sub>ClNO<sub>4</sub>: C, 66.42; H, 5.07; N, 3.52 %. Found: C, 66.45; H, 5.11; N, 3.56 %.

### 1-(4-(4-Methoxybenzoyl)-2-methyl-5-(4-nitrophenyl)-1H-pyrrol-3-yl)ethan-1-one (2b):

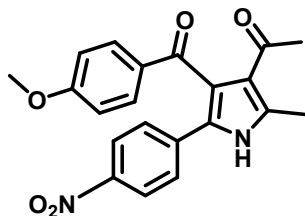

Isolated as pale yellow solid; mp: 168–170 °C; IR (KBr): 3192, 2837, 1695, 1638, 1428, 1593, 1384 cm<sup>-1</sup>; <sup>1</sup>H NMR (300 MHz, CDCl<sub>3</sub>) δ 11.50 (s, 1H), 7.86 (d, *J* = 9.0 Hz, 2H), 7.63 (d, *J* = 8.9 Hz, 2H), 7.37 (d, *J* = 9.0 Hz, 2H), 6.66 (d, *J* = 8.9 Hz, 2H), 3.63 (s, 3H), 2.43 (s, 3H), 2.03 (s, 3H). <sup>13</sup>C NMR (75 MHz, CDCl<sub>3</sub>) δ 194.3, 192.8, 163.1, 145.2, 137.0, 136.8, 131.0, 130.6, 125.9, \* 123.6, 123.2, 113.2, 54.8, 29.3, 13.5. ESI-MS *m/z* calcd for C<sub>21</sub>H<sub>18</sub>N<sub>2</sub>O<sub>5</sub>: [M]<sup>+</sup> 378.38; Found: [M+H]<sup>+</sup> 379.12. Anal. Calcd for C<sub>21</sub>H<sub>18</sub>N<sub>2</sub>O<sub>5</sub>: C, 66.66; H, 4.80; N, 7.40%. Found: C, 66.69; H, 4.86; N, 7.42%. (\*Two carbons are merged); (One quaternary carbon not picked up).

**1-(4-Benzoyl-2-methyl-5-phenyl-1H-pyrrol-3-yl)ethan-1-one (2c):<sup>1</sup>**

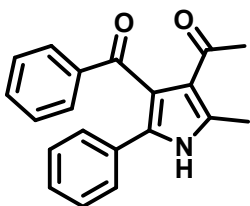

Isolated as white solid; mp: 176–177 °C; IR (KBr): 3221, 1677, 1628, 1582, 1431 cm<sup>-1</sup>; <sup>1</sup>H NMR (300 MHz, CDCl<sub>3</sub>) δ 8.99 (s, 1H), 7.85 (d, *J* = 7.0 Hz, 2H), 7.49 – 7.43 (m, 2H), 7.36 – 7.31 (m, 2H), 7.28 – 7.25 (m, 2H), 7.21 – 7.17 (m, 2H), 2.52 (s, 3H), 2.17 (s, 3H). <sup>13</sup>C NMR (75 MHz, CDCl<sub>3</sub>) δ 195.4, 193.0, 138.1, 134.9, 131.9, 130.6, 129.7, 128.6, 127.7, 127.6, 126.6, 126.5, 122.8, 120.5, 29.2, 13.3. ESI-MS *m/z* calcd for C<sub>20</sub>H<sub>17</sub>NO<sub>2</sub>: [M]<sup>+</sup> 303.36; Found: [M+H]<sup>+</sup> 304.25.

**1-(4-(4-Chlorobenzoyl)-2-methyl-5-(*p*-tolyl)-1H-pyrrol-3-yl)ethan-1-one (2d):<sup>1</sup>**

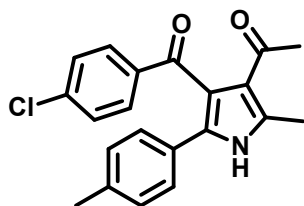

Isolated as white solid; mp: 218–220 °C; IR (KBr): 3192, 1688, 1624, 1595, 1426, 1074 cm<sup>-1</sup>; <sup>1</sup>H NMR (300 MHz, CDCl<sub>3</sub>) δ 9.53 (s, 1H), 7.76 (d, *J* = 8.6 Hz, 2H), 7.28 (d, *J* = 8.6 Hz, 2H), 7.09 (d, *J* = 8.2 Hz, 2H), 6.94 (d, *J* = 8.1 Hz, 2H), 2.44 (s, 3H), 2.23 (s, 3H), 2.18 (s, 3H). <sup>13</sup>C NMR (75 MHz, CDCl<sub>3</sub>) δ 195.1, 193.9, 139.1, 137.5, 136.9, 135.0, 130.7, 129.3, 128.6, 127.6, 126.6, 123.5, 120.3, 29.7, 21.1, 13.9. One quaternary carbon not picked up.

**1-(4-(4-Bromobenzoyl)-5-(2,4-dichlorophenyl)-2-methyl-1H-pyrrol-3-yl)ethan-1-one (2e):**

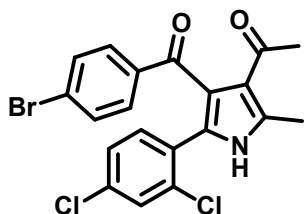

Isolated as white solid; mp: 238–240 °C; IR (KBr): 3204, 1678, 1635, 1432, 1082, 642 cm<sup>-1</sup>; <sup>1</sup>H NMR (300 MHz, CDCl<sub>3</sub>) δ 9.50 (s, 1H), 7.64 (d, *J* = 8.5 Hz, 2H), 7.45 (d, *J* = 8.4 Hz, 2H), 7.34 (d, *J* = 1.5 Hz, 1H), 7.21 (d, *J* = 8.2 Hz, 1H), 7.11 (d, *J* = 8.2 Hz, 1H), 2.59 (s, 3H), 2.22 (s, 3H). <sup>13</sup>C NMR (75 MHz, CDCl<sub>3</sub>) δ 194.2, 192.6, 137.1, 135.3, 134.2, 133.7, 132.8, 130.8, 130.2, 128.7, 128.4, 127.7, 126.9, 126.3, 122.5, 29.5, 13.2. ESI-MS *m/z* calcd for C<sub>20</sub>H<sub>14</sub>BrCl<sub>2</sub>NO<sub>2</sub>: [M]<sup>+</sup> 451.14; Found: [M+H]<sup>+</sup> 452.12. Anal. Calcd for C<sub>20</sub>H<sub>14</sub>BrCl<sub>2</sub>NO<sub>2</sub>: C, 53.25; H, 3.13; N, 3.10; %. Found: C, 53.28; H, 3.18; N, 3.07%. One quaternary carbon not picked up.

**1-(5-(6-Bromobenzo[d][1,3]dioxol-5-yl)-4-(4-chlorobenzoyl)-2-methyl-1H-pyrrol-3-yl)ethan-1-one (2f):**

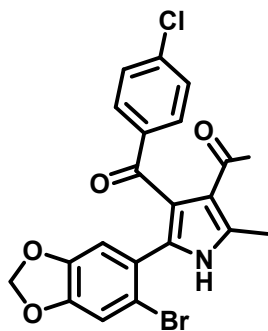

Isolated as white solid; mp: 208–210 °C; IR (KBr): 3022, 1669, 1631, 1421, 1078, 921  $\text{cm}^{-1}$ ;  $^1\text{H}$  NMR (300 MHz,  $\text{CDCl}_3$ )  $\delta$  11.04 (s, 1H), 7.73 (d,  $J = 8.6$  Hz, 2H), 7.28 (d,  $J = 8.6$  Hz, 2H), 6.94 (s, 1H), 6.74 (s, 1H), 5.95 (s, 2H), 2.55 (s, 3H), 2.22 (s, 3H).  $^{13}\text{C}$  NMR (75 MHz,  $\text{CDCl}_3$ )  $\delta$  194.4, 192.5, \*162.2, 148.3, 146.5, 138.1, 137.1, 134.7, 130.4, 127.9, 125.1, 122.1, 114.7, 112.2, 112.1, 101.7, 31.1, 13.3. ESI-MS  $m/z$  calcd for  $\text{C}_{21}\text{H}_{15}\text{BrClNO}_4$ :  $[\text{M}]^+$  460.71; Found:  $[\text{M}+\text{H}]^+$  461.02. Anal. Calcd for  $\text{C}_{21}\text{H}_{15}\text{BrClNO}_4$ : C, 54.75; H, 3.28; N, 3.04%. Found: C, 54.78; H, 3.32; N, 3.07%. (\*Two carbons are merged).

**1-(5-(3-Bromophenyl)-2-methyl-4-(4-methylbenzoyl)-1H-pyrrol-3-yl)ethan-1-one (2g):**

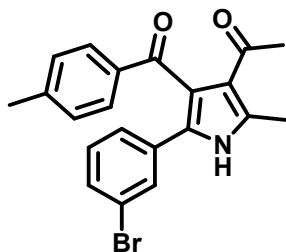

Isolated as white solid; mp: 190–192 °C; IR (KBr): 3213, 1685, 1623, 1436, 628  $\text{cm}^{-1}$ ;  $^1\text{H}$  NMR (300 MHz,  $\text{CDCl}_3$ )  $\delta$  9.22 (s, 1H), 7.73 (d,  $J = 7.5$  Hz, 2H), 7.43 (s, 1H), 7.28 – 7.13 (m, 4H), 7.04 (t,  $J = 7.4$  Hz, 1H), 2.55 (s, 3H), 2.35 (s, 3H), 2.17 (s, 3H).  $^{13}\text{C}$  NMR (75 MHz,  $\text{CDCl}_3$ )  $\delta$  195.1, 192.9, 142.9, 135.4, 132.7, 129.3, 129.2, 128.7,\* 128.4, 127.4, 125.0, 122.8, 121.5, 29.2, 20.9, 13.3. ESI-MS  $m/z$  calcd for  $\text{C}_{21}\text{H}_{18}\text{BrNO}_2$ :  $[\text{M}]^+$  396.28; Found:  $[\text{M}+\text{H}]^+$  397.41. Anal. Calcd for  $\text{C}_{21}\text{H}_{18}\text{BrNO}_2$ : C, 63.65; H, 4.58; N, 3.53%. Found: C, 63.69; H, 4.54; N, 3.58%. (\*Three carbons are merged); One quaternary carbon is not picked up.

**1-(5-(4-Chlorophenyl)-4-(4-methoxybenzoyl)-2-methyl-1H-pyrrol-3-yl)ethan-1-one (2h):**

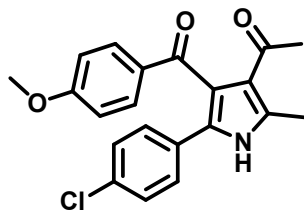

Isolated as white solid; mp: 162–163 °C; IR (KBr): 3193, 2841, 1684, 1642, 1433, 1087  $\text{cm}^{-1}$ ;  $^1\text{H}$  NMR (300 MHz,  $\text{CDCl}_3$ )  $\delta$  11.18 (s, 1H), 7.55 (d,  $J = 8.8$  Hz, 2H), 7.10 (d,  $J = 8.6$  Hz, 2H), 6.94 (d,  $J = 8.4$  Hz, 2H), 6.58 (d,  $J = 8.8$  Hz, 2H), 3.57 (s, 3H), 2.34 (s, 3H), 1.95 (s, 3H).  $^{13}\text{C}$  NMR (75 MHz,  $\text{CDCl}_3$ )  $\delta$  194.4, 193.1, 162.8, 135.4, 132.0, 131.0, 129.2, 127.9, 127.8, 127.5, 122.6, 121.1,

113.0, 54.8, 29.3, 13.4. ESI-MS  $m/z$  calcd for  $C_{21}H_{18}ClNO_3$ :  $[M]^+$  367.83; Found:  $[M+H]^+$  368.92. Anal. Calcd for  $C_{21}H_{18}ClNO_3$ : C, 68.57; H, 4.93; N, 3.81%. Found: C, 68.61; H, 4.96; N, 3.84%. One quaternary carbon is not picked up.

**1-(4-([1,1'-Biphenyl]-4-carbonyl)-5-([1,1'-biphenyl]-4-yl)-2-methyl-1*H*-pyrrol-3-yl)ethan-1-one (2i):**

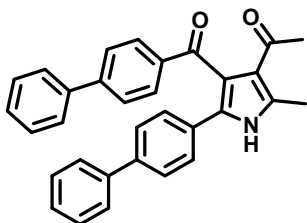

Isolated as white solid; mp: 182–184 °C; IR (KBr): 3199, 3023, 1691, 1652, 1440  $cm^{-1}$ ;  $^1H$  NMR (300 MHz,  $CDCl_3$ )  $\delta$  9.35 (s, 1H), 7.96 (d,  $J = 8.3$  Hz, 2H), 7.60 – 7.53 (m, 4H), 7.48 – 7.30 (m, 12H), 2.49 (s, 3H), 2.19 (s, 3H).  $^{13}C$  NMR (75 MHz,  $CDCl_3$ )  $\delta$  195.7, 193.4, 144.9, 139.8, 139.6, 139.3, 137.2, 135.4, 129.8, 129.6, 129.5, 128.6, 128.5, 128.4, 127.7, 127.0, 126.9, 126.7, 126.6, 126.4, 123.3, 121.1, 29.6, 13.7. ESI-MS  $m/z$  calcd for  $C_{32}H_{25}NO_2$ :  $[M]^+$  455.56; Found:  $[M+H]^+$  456.48. Anal. Calcd for  $C_{32}H_{25}NO_2$ : C, 84.37; H, 5.53; N, 3.07%. Found: C, 84.41; H, 5.55; N, 3.03%.

**1-(5-(4-Chlorophenyl)-4-(4-methoxybenzoyl)-2-phenyl-1*H*-pyrrol-3-yl)ethan-1-one (2j):**

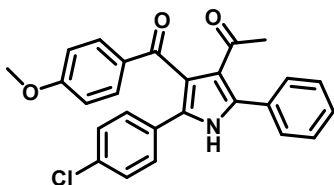

Isolated as white solid; mp: 212–214 °C; IR (KBr): 3197, 3011, 2836, 1688, 1652, 1427, 1089  $cm^{-1}$ ;  $^1H$  NMR (300 MHz,  $CDCl_3$ )  $\delta$  9.09 (s, 1H), 7.82 (d,  $J = 8.9$  Hz, 2H), 7.53 – 7.44 (m, 5H), 7.30 (d,  $J = 8.6$  Hz, 2H), 7.18 (d,  $J = 8.5$  Hz, 2H), 6.84 (d,  $J = 8.9$  Hz, 2H), 3.82 (s, 3H), 1.95 (s, 3H).  $^{13}C$  NMR (75 MHz,  $CDCl_3$ )  $\delta$  194.7, 193.9, 163.4, 131.6, 131.4, 130.0, 129.6, 129.5, 129.2, 129.1, 129.0, 128.9, \* 128.6, 128.1, 128.0, 124.6, 113.6, 55.4, 29.6. ESI-MS  $m/z$  calcd for  $C_{26}H_{20}ClNO_3$ :  $[M]^+$  429.90; Found:  $[M+H]^+$  430.25. Anal. Calcd for  $C_{26}H_{20}ClNO_3$ : C, 72.64; H, 4.69; N, 3.26%. Found: C, 72.68; H, 4.72; N, 3.23%. (\*Two carbons are merged).

**1-(5-(4-Bromophenyl)-4-(4-chlorobenzoyl)-2-phenyl-1H-pyrrol-3-yl)ethan-1-one (2k):**

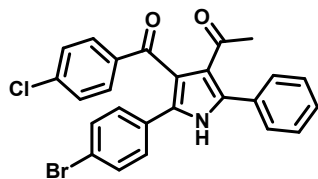

Isolated as white solid; mp: 198–199 °C; IR (KBr): 3182, 3054, 1688, 1652, 1432, 1071, 633 cm<sup>-1</sup>; <sup>1</sup>H NMR (300 MHz, CDCl<sub>3</sub>) δ 9.65 (s, 1H), 7.95 (d, *J* = 7.2 Hz, 2H), 7.15 – 7.55 (m, 11H), 2.48 (s, 3H). <sup>13</sup>C NMR (75 MHz, CDCl<sub>3</sub>) δ 196.3, 193.9, 145.6, 139.9, 137.3, 130.0, 129.9, 129.6, 128.9, 128.8, 128.7, 128.0, 127.3, 127.2, 127.1, 126.9, 126.6, 121.3, 29.8. ESI-MS *m/z* calcd for C<sub>25</sub>H<sub>17</sub>BrClNO<sub>2</sub>: [M]<sup>+</sup> 478.77; Found: [M+H]<sup>+</sup> 479.31. Anal. Calcd for C<sub>25</sub>H<sub>17</sub>BrClNO<sub>2</sub>: C, 62.72; H, 3.58; N, 2.93%. Found: C, 62.76; H, 3.63; N, 2.91 %.

**1-(4-(4-Methoxybenzoyl)-5-(4-nitrophenyl)-2-phenyl-1H-pyrrol-3-yl)ethan-1-one (2l):**

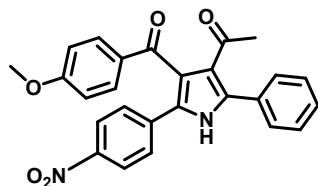

Isolated as white solid; mp: 205–207 °C; IR (KBr): 3177, 3062, 2829, 1672, 1636, 1378, 1449, 1071 cm<sup>-1</sup>; <sup>1</sup>H NMR (300 MHz, CDCl<sub>3</sub>) δ 9.49 (s, 1H), 8.04 (d, *J* = 8.6 Hz, 2H), 7.85 (d, *J* = 8.7 Hz, 2H), 7.57 – 7.49 (m, 5H), 7.39 (d, *J* = 8.1 Hz, 2H), 6.86 (d, *J* = 8.8 Hz, 2H), 3.83 (s, 3H), 1.98 (s, 3H). <sup>13</sup>C NMR (75 MHz, CDCl<sub>3</sub>) δ 192.3, 191.9, 162.7, 145.9, 139.8, 137.5, 136.2, 131.9, 131.2, 130.8, 129.7, 129.0, 128.2, 128.0, 127.6, 127.5, 123.1, 112.9, 53.1, 12.3. ESI-MS *m/z* calcd for C<sub>26</sub>H<sub>20</sub>N<sub>2</sub>O<sub>5</sub>: [M]<sup>+</sup> 440.46; Found: [M+H]<sup>+</sup> 441.28. Anal. Calcd for C<sub>26</sub>H<sub>20</sub>N<sub>2</sub>O<sub>5</sub>: C, 70.90; H, 4.58; N, 6.36%. Found: C, 70.94; H, 4.52; N, 6.38%.

**1-(4-(4-Bromobenzoyl)-5-(2,4-dichlorophenyl)-2-(trifluoromethyl)-1H-pyrrol-3-yl)ethan-1-one (2m):**

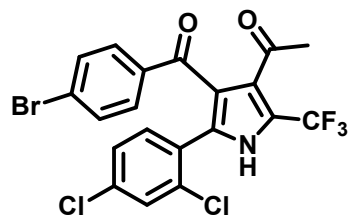

Isolated as white solid; mp: 178–180 °C; IR (KBr): 3201, 1686, 1658, 1454, 1085, 769, 654 cm<sup>-1</sup>; <sup>1</sup>H NMR (300 MHz, CDCl<sub>3</sub>) δ 11.84 (s, 1H), 7.48 (d, *J* = 8.5 Hz, 2H), 7.35–7.33 (m, 2H), 7.27 (s, 1H), 7.14 – 7.05 (m, 2H), 2.47 (s, 3H). <sup>13</sup>C NMR (75 MHz, CDCl<sub>3</sub>) δ 191.2, 185.0, 139.2, 136.6, 135.2, 134.1, 133.2, 131.2 (<sup>2</sup>*J*<sub>C-F</sub> = 32.1 Hz), 131.0, 130.3, 129.2, 129.0, 128.1, 127.3, 126.6, 123.8



( $^1J_{C-F} = 270$  Hz), 115.3, 29.3. ESI-MS  $m/z$  calcd for  $C_{20}H_{11}BrCl_2F_3NO_2$ :  $[M]^+$  505.11; Found:  $[M+H]^+$  506.22. Anal. Calcd for  $C_{20}H_{11}BrCl_2F_3NO_2$ : C, 47.56; H, 2.20; N, 2.77%. Found: C, 47.52; H, 2.24; N, 2.75%.

**2,2,2-Trifluoro-1-(5-(4-methoxyphenyl)-4-(4-methylbenzoyl)-2-(trifluoromethyl)-1H-pyrrol-3-yl)ethan-1-one (2n):**

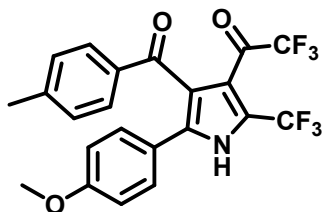

Isolated as white solid; mp: 152–153 °C; IR (KBr): 3173, 2832, 1677, 1664, 1438, 772  $cm^{-1}$ ;  $^1H$  NMR (300 MHz,  $CDCl_3$ )  $\delta$  9.33 (s, 1H), 7.69 (d,  $J = 8.2$  Hz, 2H), 7.15 (d,  $J = 8.2$  Hz, 2H), 7.05 (d,  $J = 8.7$  Hz, 2H), 6.85 (d,  $J = 9.1$  Hz, 2H), 3.82 (s, 2H), 2.35 (s, 2H).  $^{13}C$  NMR (75 MHz,  $CDCl_3$ )  $\delta$  189.8, 186.2, 160.6, 144.9, 138.7 ( $^1J_{C-F} = 256.8$  Hz), 130.9, 130.8, 130.5, 129.2, 129.1, \* 123.9 ( $^1J_{C-F} = 272.2$  Hz), 121.2, 118.0, 114.1, 113.0, 55.3, 21.7. ESI-MS  $m/z$  calcd for  $C_{22}H_{15}F_6NO_3$ :  $[M]^+$  455.36; Found:  $[M+H]^+$  456.12. Anal. Calcd for  $C_{22}H_{15}F_6NO_3$ : C, 58.03; H, 3.32; N, 3.08%. Found: C, 58.05; H, 3.37; N, 3.11%. (\*Two carbons are merged).

**Isopropyl 4-acetyl-2-(4-chlorophenyl)-5-(trifluoromethyl)-1H-pyrrole-3-carboxylate (2o):**

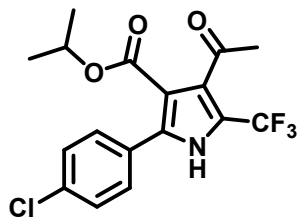

Isolated as white solid; mp: 133–134 °C; IR (KBr): 3167, 3034 2813, 1671, 1648, 1078, 778  $cm^{-1}$ ;  $^1H$  NMR (300 MHz,  $CDCl_3$ )  $\delta$  10.18 (s, 1H), 7.48 – 7.26 (m, 4H), 5.16 – 5.08 (m, 1H), 2.39 (s, 3H), 1.22 (d,  $J = 6.1$  Hz, 6H).  $^{13}C$  NMR (75 MHz,  $CDCl_3$ )  $\delta$  196.2, 166.4, 134.5 ( $^2J_{C-F} = 33.5$  Hz), 133.5, 130.9, 129.5, 128.9, 128.7, 128.2, 122.4 ( $^1J_{C-F} = 255$  Hz), 113.9, 68.5, 30.1, 21.4. ESI-MS  $m/z$  calcd for  $C_{17}H_{15}ClF_3NO_3$ :  $[M]^+$  373.76; Found:  $[M+H]^+$  374.38. Anal. Calcd for  $C_{17}H_{15}ClF_3NO_3$ : C, 54.63; H, 4.05; N, 3.75%. Found: C, 54.66; H, 4.09; N, 3.71%.

**(4-Chlorophenyl)(4,6-dimethoxy-1*H*-indol-2-yl)methanone (3a):**

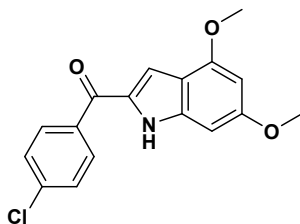

Isolated as white solid; mp: 131–133 °C; IR (KBr): 3317, 2846, 1687, 1115, 1072, 714 cm<sup>-1</sup>; <sup>1</sup>H NMR (300 MHz, CDCl<sub>3</sub>) δ 9.29 (s, 1H), 7.91 (d, *J* = 7.6 Hz, 2H), 7.49 (d, *J* = 7.7 Hz, 2H), 7.17 (s, 1H), 6.46 (s, 1H), 6.20 (s, 1H), 3.92 (s, 3H), 3.87 (s, 3H). <sup>13</sup>C NMR (75 MHz, CDCl<sub>3</sub>) δ 184.5, 161.6, 155.7, 139.8, 136.6, 132.3, 130.4, 128.7, 125.4, 114.6, 111.2, 93.1, 86.1, 55.6, 55.4. ESI-MS *m/z* calcd for C<sub>17</sub>H<sub>14</sub>ClNO<sub>3</sub>: [M]<sup>+</sup> 315.75; Found: [M+H]<sup>+</sup> 316.12. Anal. Calcd for C<sub>17</sub>H<sub>14</sub>ClNO<sub>3</sub>: C, 64.67; H, 4.47; N, 4.44%. Found: C, 64.69; H, 4.43; N, 4.46%.

**(4-Chloro-5,6-dimethoxy-1*H*-indol-2-yl)(4-chlorophenyl)methanone (3b):**

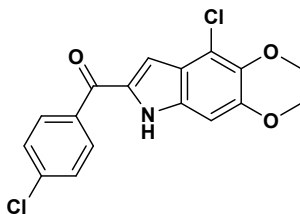

Isolated as white solid; mp: 148–149 °C; IR (KBr): 3304, 2853, 1679, 1115, 1086, 828 cm<sup>-1</sup>; <sup>1</sup>H NMR (300 MHz, CDCl<sub>3</sub>) δ 9.74 (s, 1H), 7.85 (d, *J* = 8.4 Hz, 2H), 7.68 (d, *J* = 8.3 Hz, 2H), 7.12 (s, 1H), 6.82 (s, 1H), 3.93 (s, 3H), 3.89 (s, 3H). <sup>13</sup>C NMR (75 MHz, CDCl<sub>3</sub>) δ 185.1, 154.6, 136.6, 134.7, 132.6, 131.8, 130.6, 128.4, 127.4, 125.3, 120.9, 111.9, 92.8, 61.1, 56.2. ESI-MS *m/z* calcd for C<sub>17</sub>H<sub>13</sub>Cl<sub>2</sub>NO<sub>3</sub>: [M]<sup>+</sup> 350.19; Found: [M+H]<sup>+</sup> 351.52. Anal. Calcd for C<sub>17</sub>H<sub>13</sub>Cl<sub>2</sub>NO<sub>3</sub>: C, 58.31; H, 3.74; N, 4.00%. Found: C, 58.34; H, 3.79; N, 4.02%.

**(6-Methoxy-1*H*-indol-2-yl)(*p*-tolyl)methanone (3c):**

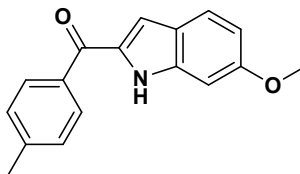

Isolated as white solid; mp: 102–103 °C; IR (KBr): 3312, 2850, 1683, 1102, 727 cm<sup>-1</sup>; <sup>1</sup>H NMR (300 MHz, CDCl<sub>3</sub>) δ 9.26 (s, 1H), 7.89 (d, *J* = 7.7 Hz, 2H), 7.57 (d, *J* = 8.7 Hz, 1H), 7.32 (d, *J* = 7.7 Hz, 2H), 7.10 (s, 1H), 6.90 – 6.80 (m, 2H), 3.88 (s, 3H), 2.46 (s, 3H). <sup>13</sup>C NMR (75 MHz, DMSO) δ 191.9, 160.6, 143.2, 134.2, 132.4, 131.7, 129.7, 129.6, 129.1, 126.0, 124.6, 113.9, 97.2, 55.3, 21.6. ESI-MS *m/z* calcd for C<sub>17</sub>H<sub>15</sub>NO<sub>2</sub>: [M]<sup>+</sup> 265.31; Found: [M+H]<sup>+</sup> 266.12. Anal. Calcd for C<sub>17</sub>H<sub>15</sub>NO<sub>2</sub>: C, 76.96; H, 5.70; N, 5.28%. Found: C, 76.98; H, 5.66; N, 5.25%.

**(4-Chlorophenyl)(7-methoxy-1*H*-indol-2-yl)methanone (3d):**

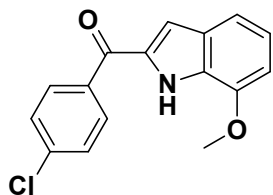

Isolated as white solid; mp: 112–114 °C; IR (KBr): 3319, 3012, 1678, 1109, 1077, 811 cm<sup>-1</sup>; <sup>1</sup>H NMR (300 MHz, CDCl<sub>3</sub>) δ 9.32 (s, 1H), 7.73 (d, *J* = 8.5 Hz, 2H), 7.49 – 7.28 (m, 6H), 3.82 (s, 3H). <sup>13</sup>C NMR (75 MHz, CDCl<sub>3</sub>) δ 190.8, 159.4, 139.1, 134.9, 134.1, 133.5, 130.9, 129.6, 129.4, 128.8, 123.4, 115.8, 115.4, 55.2. ESI-MS *m/z* calcd for C<sub>16</sub>H<sub>12</sub>ClNO<sub>2</sub>: [M]<sup>+</sup> 285.73; Found: [M+H]<sup>+</sup> 286.12. Anal. Calcd for C<sub>16</sub>H<sub>12</sub>ClNO<sub>2</sub>: C, 67.26; H, 4.23; N, 4.90%. Found: C, 67.29; H, 4.25; N, 4.95%.

**(5,6-Dimethoxy-1*H*-indol-2-yl)(thiophen-2-yl)methanone (3e):**

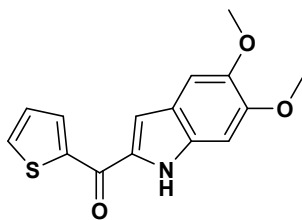

Isolated as pale orange solid; mp: 98–99 °C; IR (KBr): 3318, 2867, 1688, 1418, 1123, 827 cm<sup>-1</sup>; <sup>1</sup>H NMR (300 MHz, CDCl<sub>3</sub>) δ 9.74 (s, 1H), 8.01 (d, *J* = 3.7 Hz, 1H), 7.70 (d, *J* = 4.9 Hz, 1H), 7.36 (s, 1H), 7.24 – 7.20 (m, 1H), 7.08 (s, 1H), 6.94 (s, 1H), 3.98 (s, 3H), 3.94 (s, 3H). <sup>13</sup>C NMR (75 MHz, CDCl<sub>3</sub>) δ 176.8, 151.1, 146.4, 142.8, 133.5, 132.9, 132.5, 132.3, 127.9, 120.8, 111.2, 102.5, 93.8, 56.1, 56.0. ESI-MS *m/z* calcd for C<sub>15</sub>H<sub>13</sub>NO<sub>3</sub>S: [M]<sup>+</sup> 287.33; Found: [M+H]<sup>+</sup> 288.62. Anal. Calcd for C<sub>15</sub>H<sub>13</sub>NO<sub>3</sub>S: C, 62.70; H, 4.56; N, 4.87; S, 11.16%. Found: C, 62.74; H, 4.60; N, 4.83; S, 11.18%.

**(5*H*-[1,3]dioxolo[4,5-*f*]indol-6-yl)(4-bromophenyl)methanone (3f):**

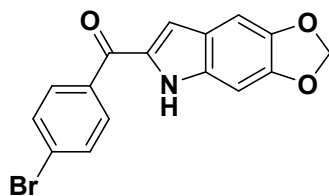

Isolated as white solid; mp: 157–159 °C; IR (KBr): 3296, 3012, 1691, 1099, 911, 668 cm<sup>-1</sup>; <sup>1</sup>H NMR (300 MHz, CDCl<sub>3</sub>) δ 10.18 (s, 1H), 7.89 (s, 1H), 7.79 (d, *J* = 8.5 Hz, 2H), 7.49 (d, *J* = 8.5 Hz, 2H), 7.07 (s, 1H), 6.79 (s, 1H), 6.06 (s, 2H). <sup>13</sup>C NMR (75 MHz, CDCl<sub>3</sub>) δ 190.3, 149.3, 147.2, 139.3, 133.2, 131.1, 129.7, 128.8, 127.9, 126.0, 118.3, 112.9, 110.1, 102.3. ESI-MS *m/z* calcd for C<sub>16</sub>H<sub>10</sub>BrNO<sub>3</sub>: [M]<sup>+</sup> 344.16; Found: [M+H]<sup>+</sup> 345.38. Anal. Calcd for C<sub>16</sub>H<sub>10</sub>BrNO<sub>3</sub>: C, 55.84; H, 2.93; N, 4.07 %. Found: C, 55.88; H, 2.99; N, 4.03 %.

**(5-Nitro-1H-indol-2-yl)(o-tolyl)methanone (3g):**

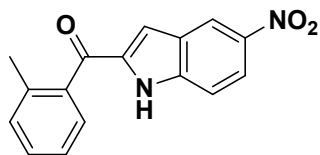

Isolated as pale white solid; mp: 143–144 °C; IR (KBr): 3328, 2918, 1687, 1373, 1117, 742  $\text{cm}^{-1}$ ;  $^1\text{H}$  NMR (300 MHz,  $\text{CDCl}_3$ )  $\delta$  9.78 (s, 1H), 8.48 (s, 1H), 8.01-7.96 (m, 2H), 7.45 – 7.39 (m, 1H), 7.35 – 7.30 (m, 2H), 7.21 – 7.14 (m, 2H), 2.29 (s, 3H).  $^{13}\text{C}$  NMR (75 MHz,  $\text{CDCl}_3$ )  $\delta$  194.1, 148.1, 137.1, 136.8, 135.9, 134.6, 131.3, 131.0, 129.3, 128.3, 125.4, 124.9, 123.7, 119.2, 105.9, 19.6. ESI-MS  $m/z$  calcd for  $\text{C}_{16}\text{H}_{12}\text{N}_2\text{O}_3$ :  $[\text{M}]^+$  280.28; Found:  $[\text{M}+\text{H}]^+$  281.38. Anal. Calcd for  $\text{C}_{16}\text{H}_{12}\text{N}_2\text{O}_3$ : C, 68.56; H, 4.32; N, 9.99%. Found: C, 68.53; H, 4.35; N, 10.03%.

**(4-Methoxyphenyl)(6-nitro-1H-indol-2-yl)methanone (3h):**

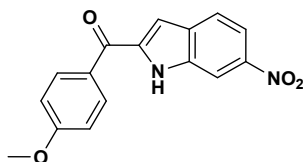

Isolated as white solid; mp: 163–164 °C; IR (KBr): 3323, 2838, 1686, 1376, 1116, 733  $\text{cm}^{-1}$ ;  $^1\text{H}$  NMR (300 MHz,  $\text{CDCl}_3$ )  $\delta$  9.61 (s, 1H), 7.91 (s, 1H), 7.63 – 7.54 (m, 2H), 7.33 (d,  $J = 9.0$  Hz, 2H), 7.04 (s, 1H), 6.65 (d,  $J = 9.0$  Hz, 2H), 3.76 (s, 3H).  $^{13}\text{C}$  NMR (75 MHz,  $\text{CDCl}_3$ )  $\delta$  182.5, 164.6, 147.6, 139.7, 135.4, 132.9, 132.2, 129.9, 127.2, 123.8, 119.4, 113.9, 106.2, 55.6. ESI-MS  $m/z$  calcd for  $\text{C}_{16}\text{H}_{12}\text{N}_2\text{O}_4$ :  $[\text{M}]^+$  296.28 ; Found:  $[\text{M}+\text{H}]^+$  297.12. Anal. Calcd for: C, 64.86; H, 4.08; N, 9.46%. Found: C, 64.89; H, 4.03; N, 9.48%.

**(5-bromo-1H-indol-2-yl)(p-tolyl)methanone (3i):**

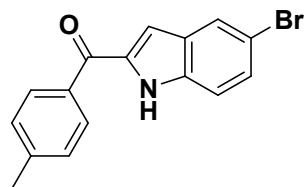

Isolated as white solid; mp: 101–102 °C; IR (KBr): 3325, 3011, 1693, 1077, 782, 651  $\text{cm}^{-1}$ ;  $^1\text{H}$  NMR (300 MHz,  $\text{CDCl}_3$ )  $\delta$  9.96 (s, 1H), 7.98 (s, 1H), 7.86 (d,  $J = 8.2$  Hz, 1H), 7.71 (d,  $J = 8.1$  Hz, 2H), 7.31 (d,  $J = 7.9$  Hz, 2H), 7.28 – 7.24 (m, 2H), 2.46 (s, 3H).  $^{13}\text{C}$  NMR (75 MHz,  $\text{CDCl}_3$ )  $\delta$  191.3, 143.8, 135.1, 133.4, 132.8, 132.1, 129.7, 129.2, 128.9, 128.3, 122.4, 115.4, 101.5, 21.6. ESI-MS  $m/z$  calcd for  $\text{C}_{16}\text{H}_{12}\text{BrNO}$ :  $[\text{M}]^+$  314.18; Found:  $[\text{M}+\text{H}]^+$  315.12. Anal. Calcd for  $\text{C}_{16}\text{H}_{12}\text{BrNO}$ : C, 61.17; H, 3.85; N, 4.46%. Found: C, 61.21; H, 3.83; N, 4.42%.

**(4,6-Dichloro-1*H*-indol-2-yl)(naphthalen-1-yl)methanone (3j):**

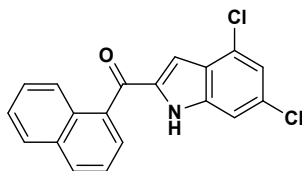

Isolated as white solid; mp: 121–122 °C; IR (KBr): 3326, 3018, 1688, 1117, 812 cm<sup>-1</sup>; <sup>1</sup>H NMR (300 MHz, CDCl<sub>3</sub>) δ 10.70 (s, 1H), 8.40 (s, 1H), 8.29 (d, *J* = 8.6 Hz, 1H), 8.00 – 7.89 (m, 3H), 7.75 (d, *J* = 8.5 Hz, 1H), 7.67 – 7.57 (m, 3H), 7.41 (s, 1H). <sup>13</sup>C NMR (75 MHz, CDCl<sub>3</sub>) δ 188.7, 136.7, 135.3, 134.8, 134.2, 132.9, 132.8, 131.2, 131.1, 130.7, 129.2, 128.6, 128.4, 127.8, 127.4, 126.7, 126.6, 124.8, 123.9. ESI-MS *m/z* calcd for C<sub>19</sub>H<sub>11</sub>Cl<sub>2</sub>NO: [M]<sup>+</sup> 340.20; Found: [M+H]<sup>+</sup> 341.22. Anal. Calcd for C<sub>19</sub>H<sub>11</sub>Cl<sub>2</sub>NO: C, 67.08; H, 3.26; N, 4.12%. Found: C, 67.11; H, 3.28; N, 4.09%.

**(1*H*-indol-2-yl)(phenyl)methanone (3k):<sup>2</sup>**

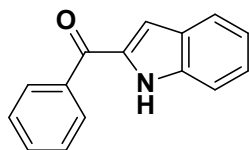

Isolated as pale yellow solid; mp: 145–146 °C; IR (KBr): 3302, 3031, 1678, 1108 cm<sup>-1</sup>; <sup>1</sup>H NMR (300 MHz, CDCl<sub>3</sub>) δ 10.43 (s, 1H), 7.94 (d, *J* = 8.5 Hz, 2H), 7.53 – 7.35 (m, 8H). <sup>13</sup>C NMR (75 MHz, CDCl<sub>3</sub>) δ 188.9, 134.2, 133.5, 130.4, 129.5, 129.4, \*129.1, 128.9, 128.8, 128.1, 116.5, 107.3. ESI-MS *m/z* calcd for C<sub>15</sub>H<sub>11</sub>NO: [M]<sup>+</sup> 221.26; Found: [M+H]<sup>+</sup> 222.12. (\*Two carbons are merged).

**(1*H*-Indol-2-yl)(p-tolyl)methanone (3l):<sup>2</sup>**

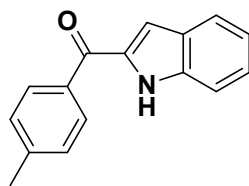

Isolated as pale yellow solid; mp: 186–187 °C; IR (KBr): 3310, 3022, 1693, 1107, 792 cm<sup>-1</sup>; <sup>1</sup>H NMR (300 MHz, CDCl<sub>3</sub>) δ 9.82 (s, 1H), 7.74 – 7.69 (m, 5H), 7.47 (d, *J* = 8.5 Hz, 2H), 7.20 (d, *J* = 8.0 Hz, 2H), 2.38 (s, 3H). <sup>13</sup>C NMR (75 MHz, CDCl<sub>3</sub>) δ 190.8, 140.4, 138.8, 135.1, 132.5, 130.8, 130.6, 130.2, 130.1, 129.2, 128.7, 115.4, 106.4, 21.4. ESI-MS *m/z* calcd for C<sub>16</sub>H<sub>13</sub>NO: [M]<sup>+</sup> 235.29; Found: [M+H]<sup>+</sup> 236.42.

**[1,1'-Biphenyl]-4-yl(6-phenyl-1H-indol-2-yl)methanone (3m):**

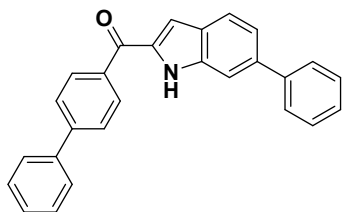

Isolated as white solid; mp: 169–170 °C; IR (KBr): 3308, 3023, 1692, 1125, 808 cm<sup>-1</sup>; <sup>1</sup>H NMR (300 MHz, CDCl<sub>3</sub>) δ 10.07 (s, 1H), 7.97 – 7.35 (m, 18H). <sup>13</sup>C NMR (75 MHz, CDCl<sub>3</sub>) δ 191.4, 145.3, 142.1, 139.9, 139.5, 135.2, 133.5, 132.1, 131.1, 130.2, 129.0, 128.9, 128.8, 128.2, 127.7, 127.1, \*127.0, 126.9, 117.3, 108.6. ESI-MS *m/z* calcd for C<sub>27</sub>H<sub>19</sub>NO: [M]<sup>+</sup> 373.45; Found: [M+H]<sup>+</sup> 374.22. Anal. Calcd for C<sub>27</sub>H<sub>19</sub>NO: C, 86.84; H, 5.13; N, 3.75%. Found: C, 86.87; H, 5.17; N, 3.78%. (\*Two carbons are merged).

**(4-Chlorophenyl)(6H-thieno[2,3-*b*]pyrrol-5-yl)methanone (3n):**

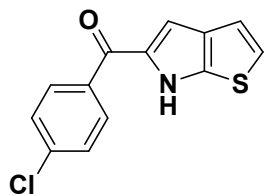

Isolated as yellow solid; mp: 97–99 °C; IR (KBr): 3316, 2878, 1691, 1127, 822 cm<sup>-1</sup>; <sup>1</sup>H NMR (300 MHz, CDCl<sub>3</sub>) δ 9.67 (s, 1H), 7.66 (d, J = 6.4 Hz, 2H), 7.41 (d, J = 3.3 Hz, 1H), 7.26 (d, J = 6.4 Hz, 2H), 7.05 (s, 1H), 6.52 (bs, 1H). <sup>13</sup>C NMR (75 MHz, CDCl<sub>3</sub>) δ 181.0, 142.6, 135.4, 134.6, 133.3, 131.7, 131.1, 128.7, 125.5, 123.9, 111.3. ESI-MS *m/z* calcd for C<sub>13</sub>H<sub>8</sub>ClNOS: [M]<sup>+</sup> 261.72; Found: [M+H]<sup>+</sup> 262.28. Anal. Calcd for C<sub>13</sub>H<sub>8</sub>ClNOS: C, 59.66; H, 3.08; N, 5.35; S, 12.25%. Found: C, 59.69; H, 3.05; N, 5.38; S, 12.30%.

**1H-indole-2-carbaldehyde (3o):<sup>3</sup>**

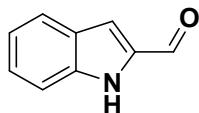

Isolated as white solid; mp: 139–141 °C; IR (KBr): 3313, 2824, 1702, 1102 cm<sup>-1</sup>; <sup>1</sup>H NMR (300 MHz, CDCl<sub>3</sub>) δ 10.07 (s, 1H), 9.22 (s, 1H), 8.36 – 8.30 (m, 1H), 7.87 (s, 1H), 7.48 – 7.45 (m, 1H), 7.34 – 7.32 (m, 2H). <sup>13</sup>C NMR (75 MHz, CDCl<sub>3</sub>) δ 184.4, 136.6, 136.5, 123.7, 123.0, 121.7, 120.7, 118.0, 111.6. ESI-MS *m/z* calcd for C<sub>9</sub>H<sub>7</sub>NO: [M]<sup>+</sup> 145.16; Found: [M+H]<sup>+</sup> 146.22.

### Bis(6-bromo-1*H*-indol-2-yl)methanone (3p)

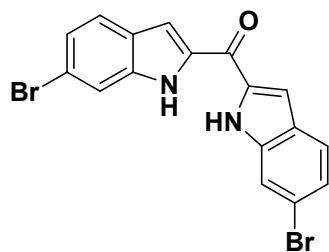

Isolated as white solid; mp: 171–172 °C; IR (KBr): 3331, 3016, 1698, 1121, 813, 649 $\text{cm}^{-1}$ ;  $^1\text{H}$  NMR (300 MHz,  $\text{CDCl}_3$ )  $\delta$  10.49 (s, 2H), 7.33 (s, 2H), 7.29 (s, 2H), 6.81 (d,  $J = 8.6$  Hz, 2H), 6.62 (d,  $J = 8.6$  Hz, 2H).  $^{13}\text{C}$  NMR (75 MHz,  $\text{CDCl}_3$ )  $\delta$  178.9, 136.4, 134.0, 130.4, 127.8, 127.4, 124.5, 120.4, 110.6. ESI-MS  $m/z$  calcd for  $\text{C}_{17}\text{H}_{10}\text{Br}_2\text{N}_2\text{O}$ :  $[\text{M}]^+$  418.09; Found:  $[\text{M}+2\text{H}]^+$  420.44. Anal. Calcd for  $\text{C}_{17}\text{H}_{10}\text{Br}_2\text{N}_2\text{O}$ : C, 48.84; H, 2.41; N, 6.70%. Found: C, 48.89; H, 2.44; N, 6.76%.

#### Reference:

1. R. Suresh, S. Muthusubramanian, M. Nagaraj and G. Manickam, *Tetrahedron Lett.* 2013, **54**, 1779.
2. Q. -Q. Yang, C. Xiao, L. -Q. Lu, J.An, F. Tan, B. -J. Li and W. -J. Xiao, 2012, **51**, 9137.
3. CAS Number: 19005-93-7

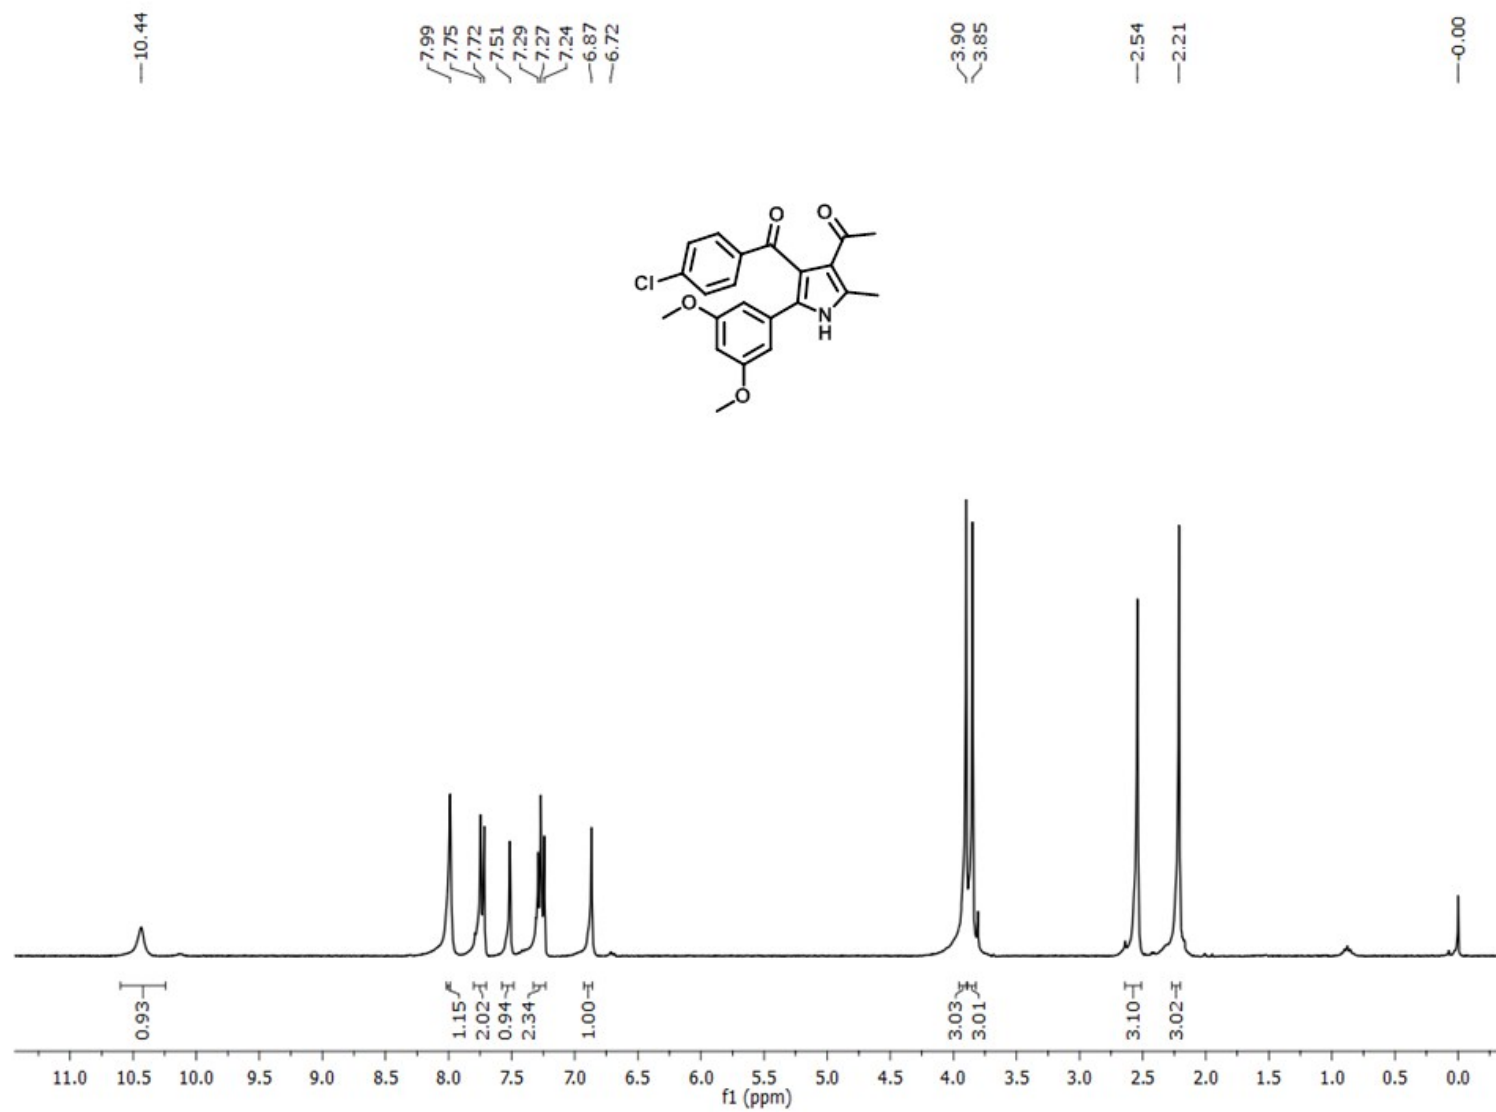

Figure 1.  $^1\text{H}$  NMR spectrum of compound **2a**



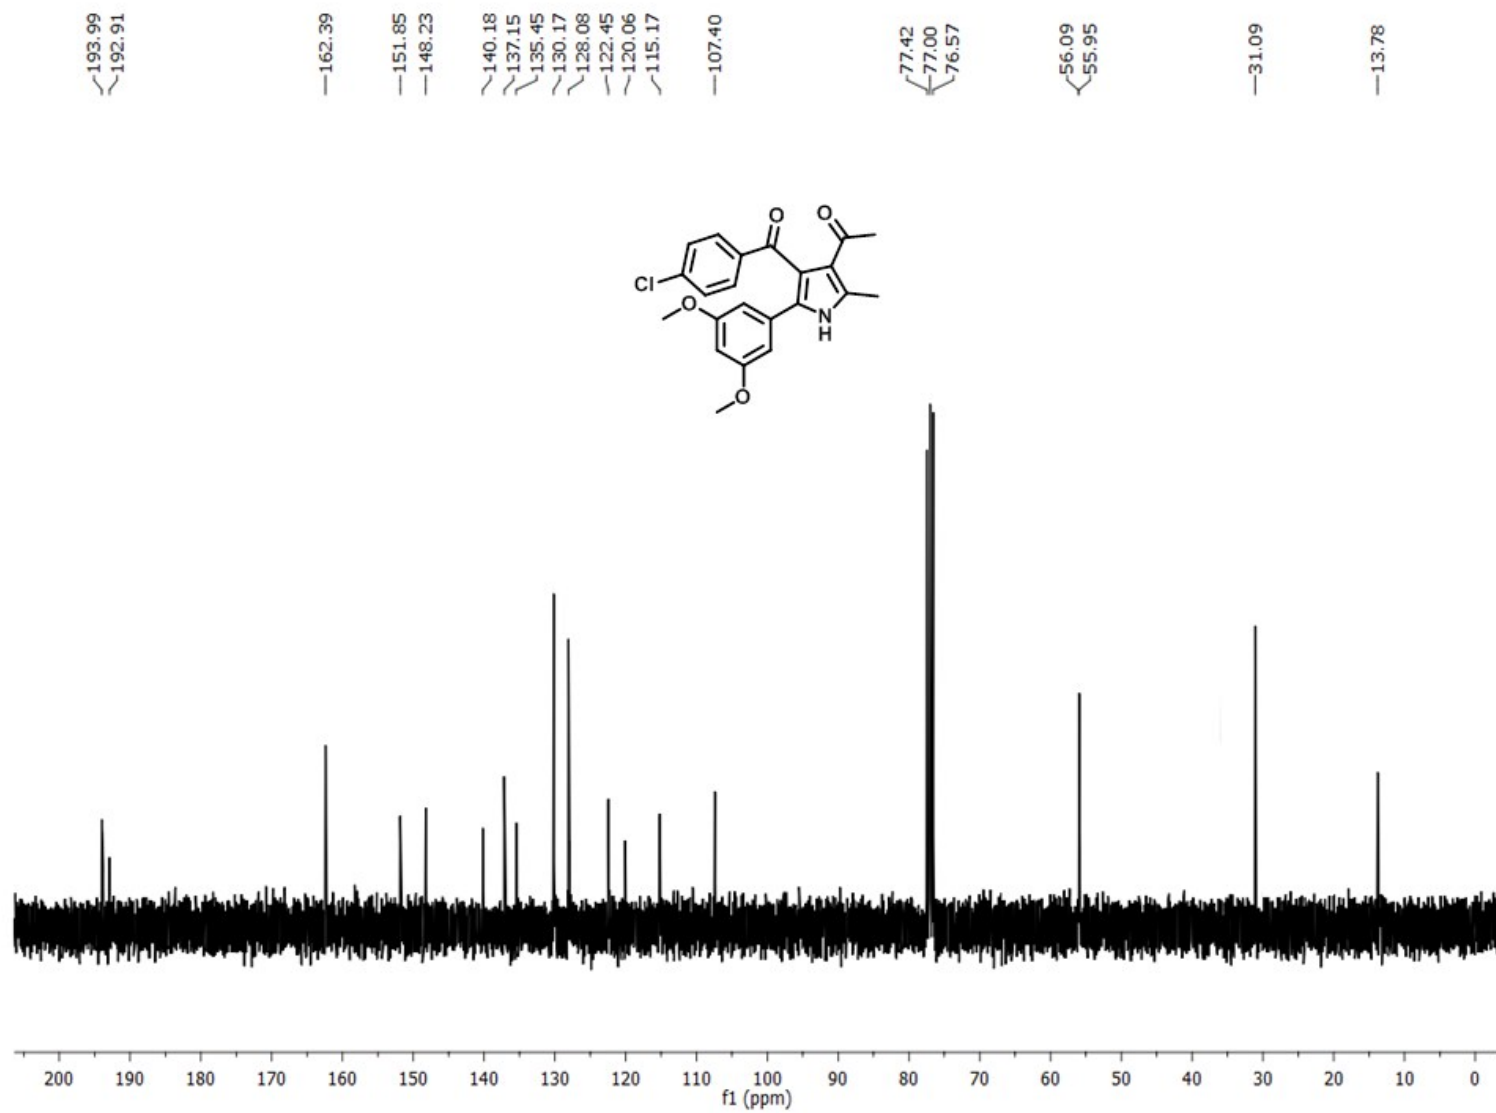

Figure 2. <sup>13</sup>C NMR spectrum of compound **2a**

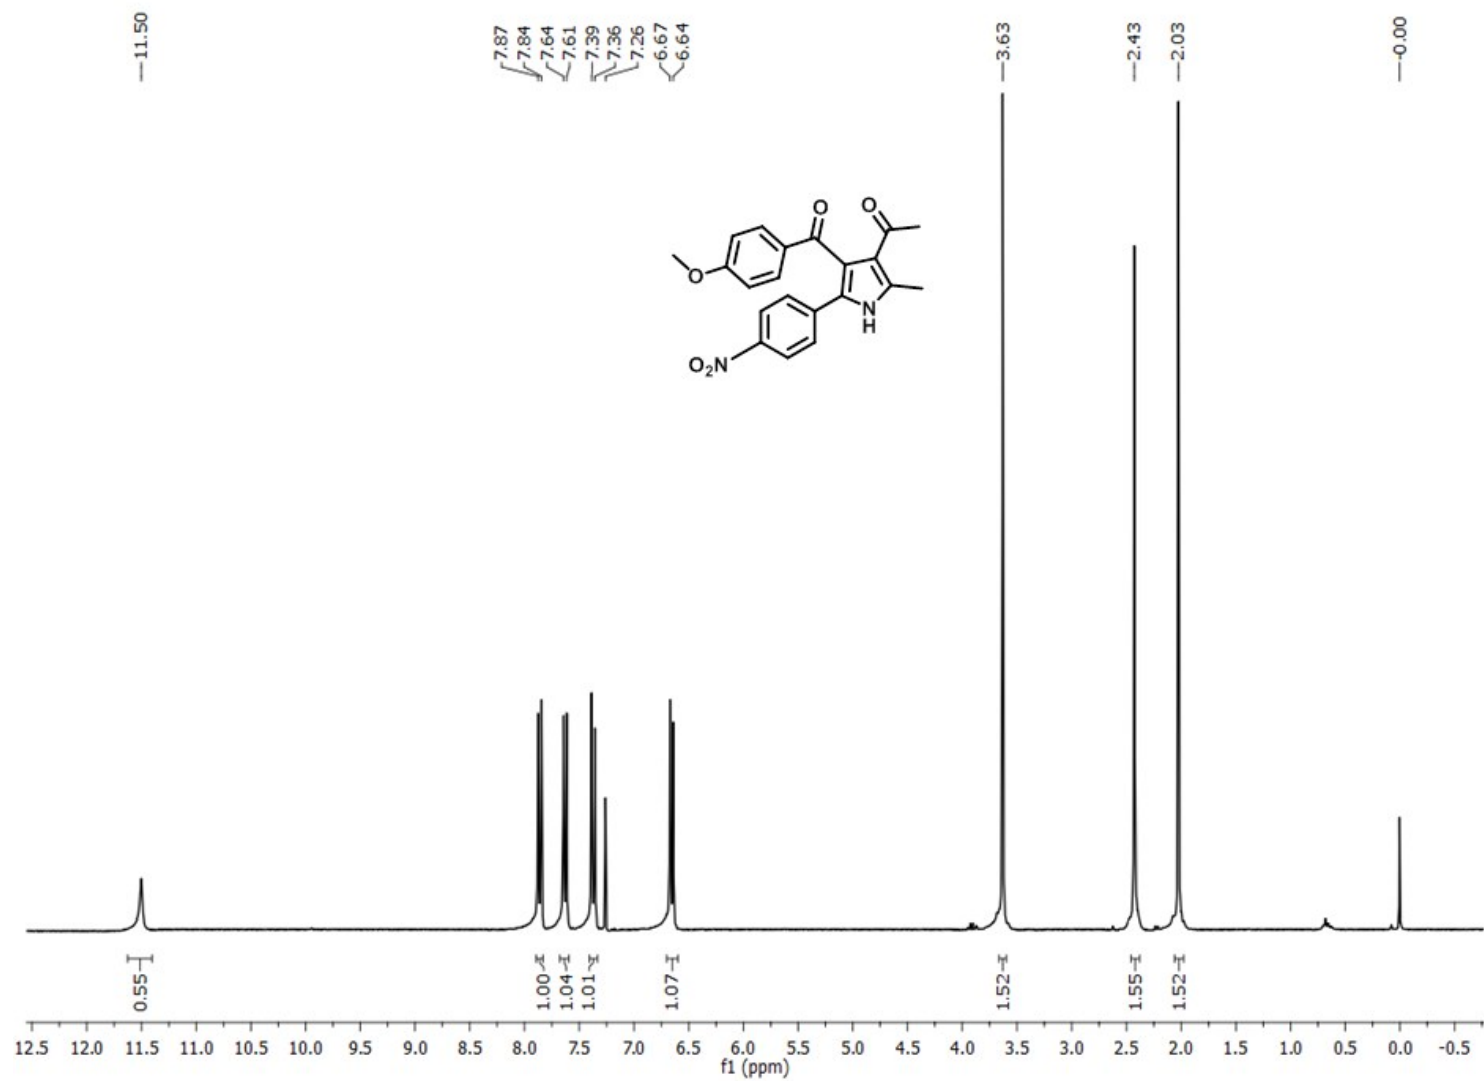

Figure 3.  $^1\text{H}$  NMR spectrum of compound **2b**

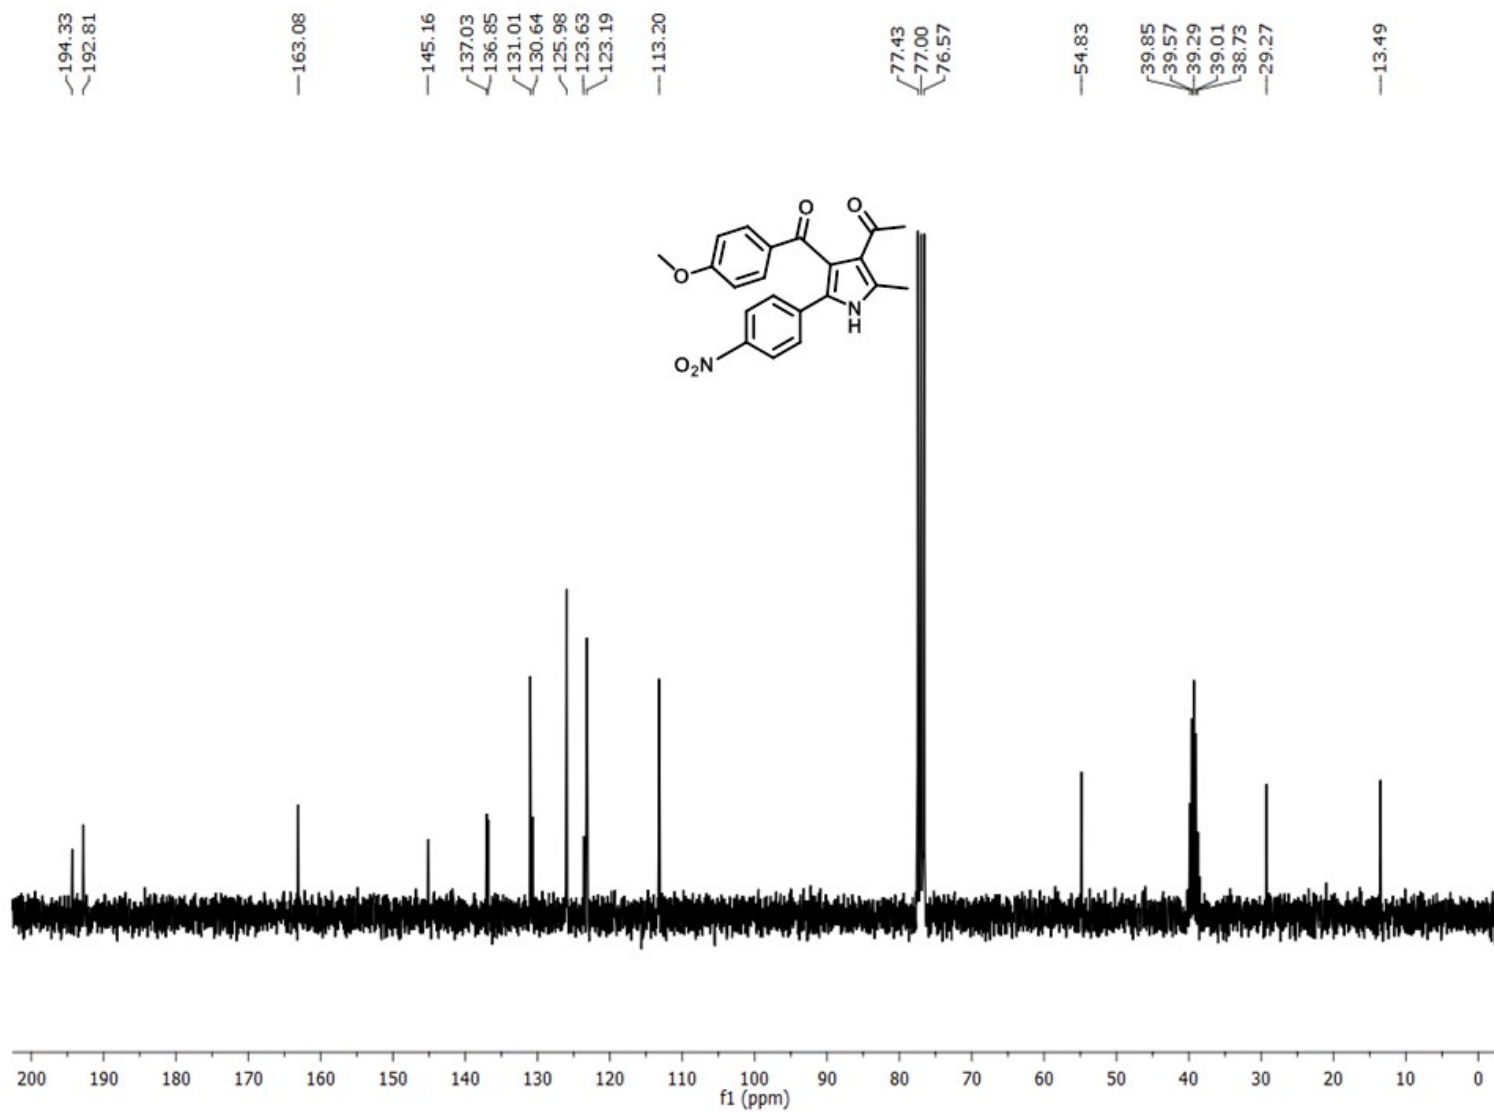

Figure 4. <sup>13</sup>C NMR spectrum of compound **2b**

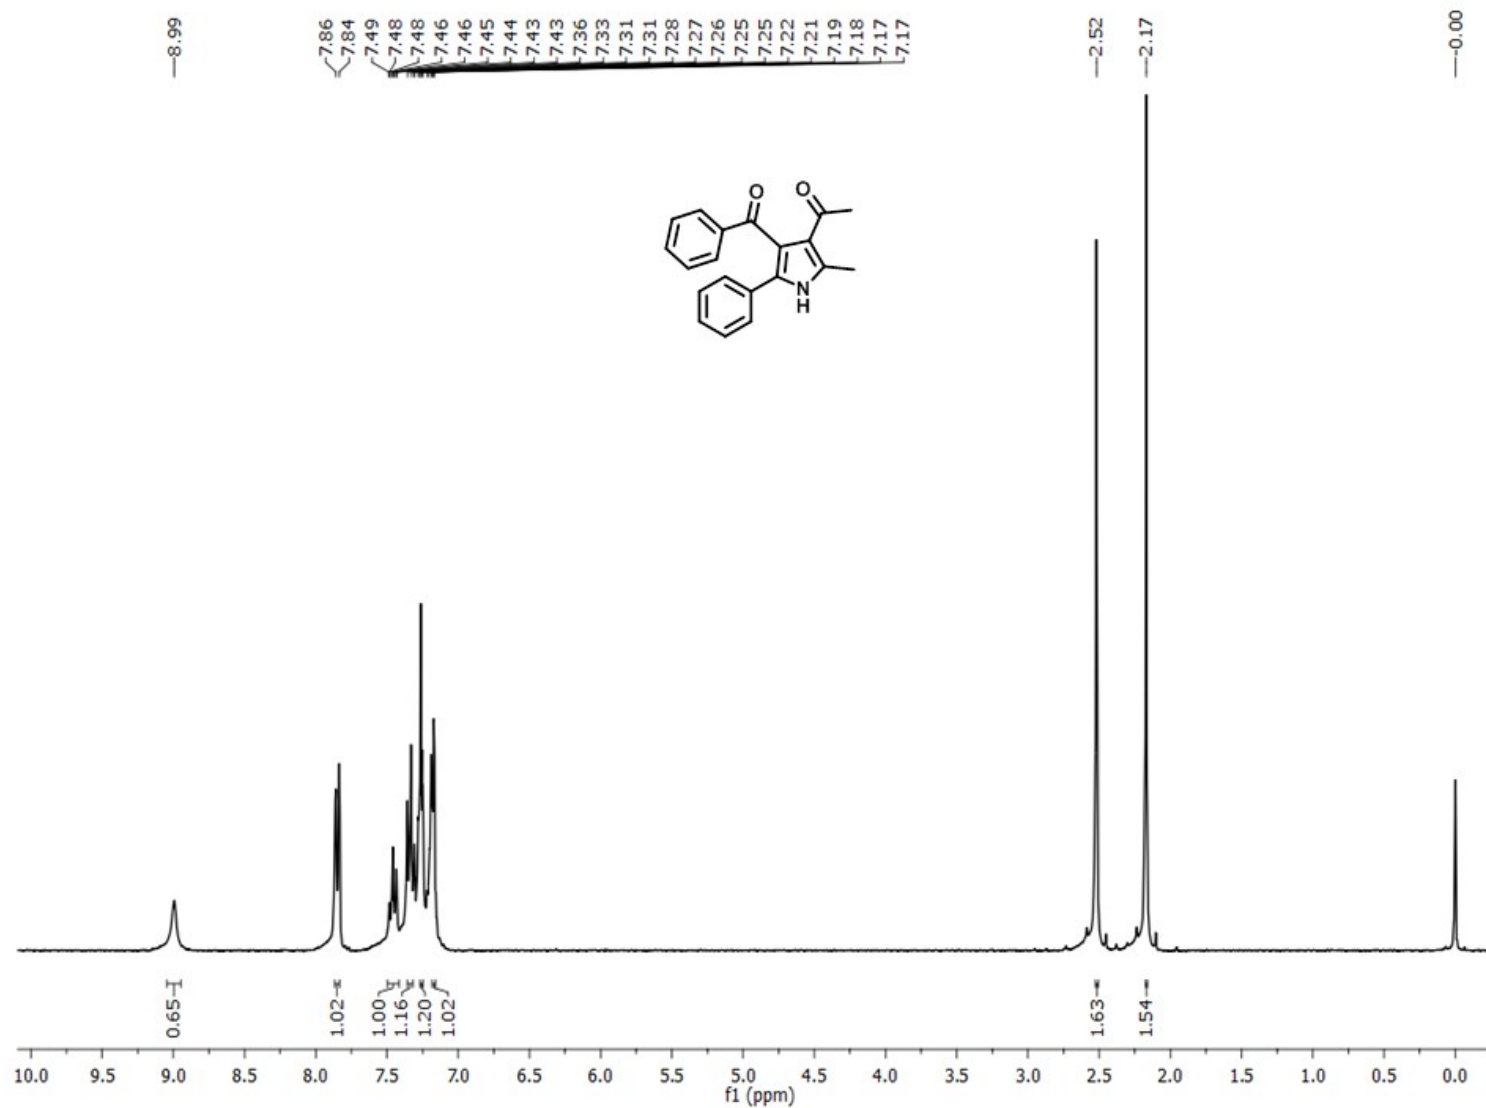

Figure 5. <sup>1</sup>H NMR spectrum of compound **2c**

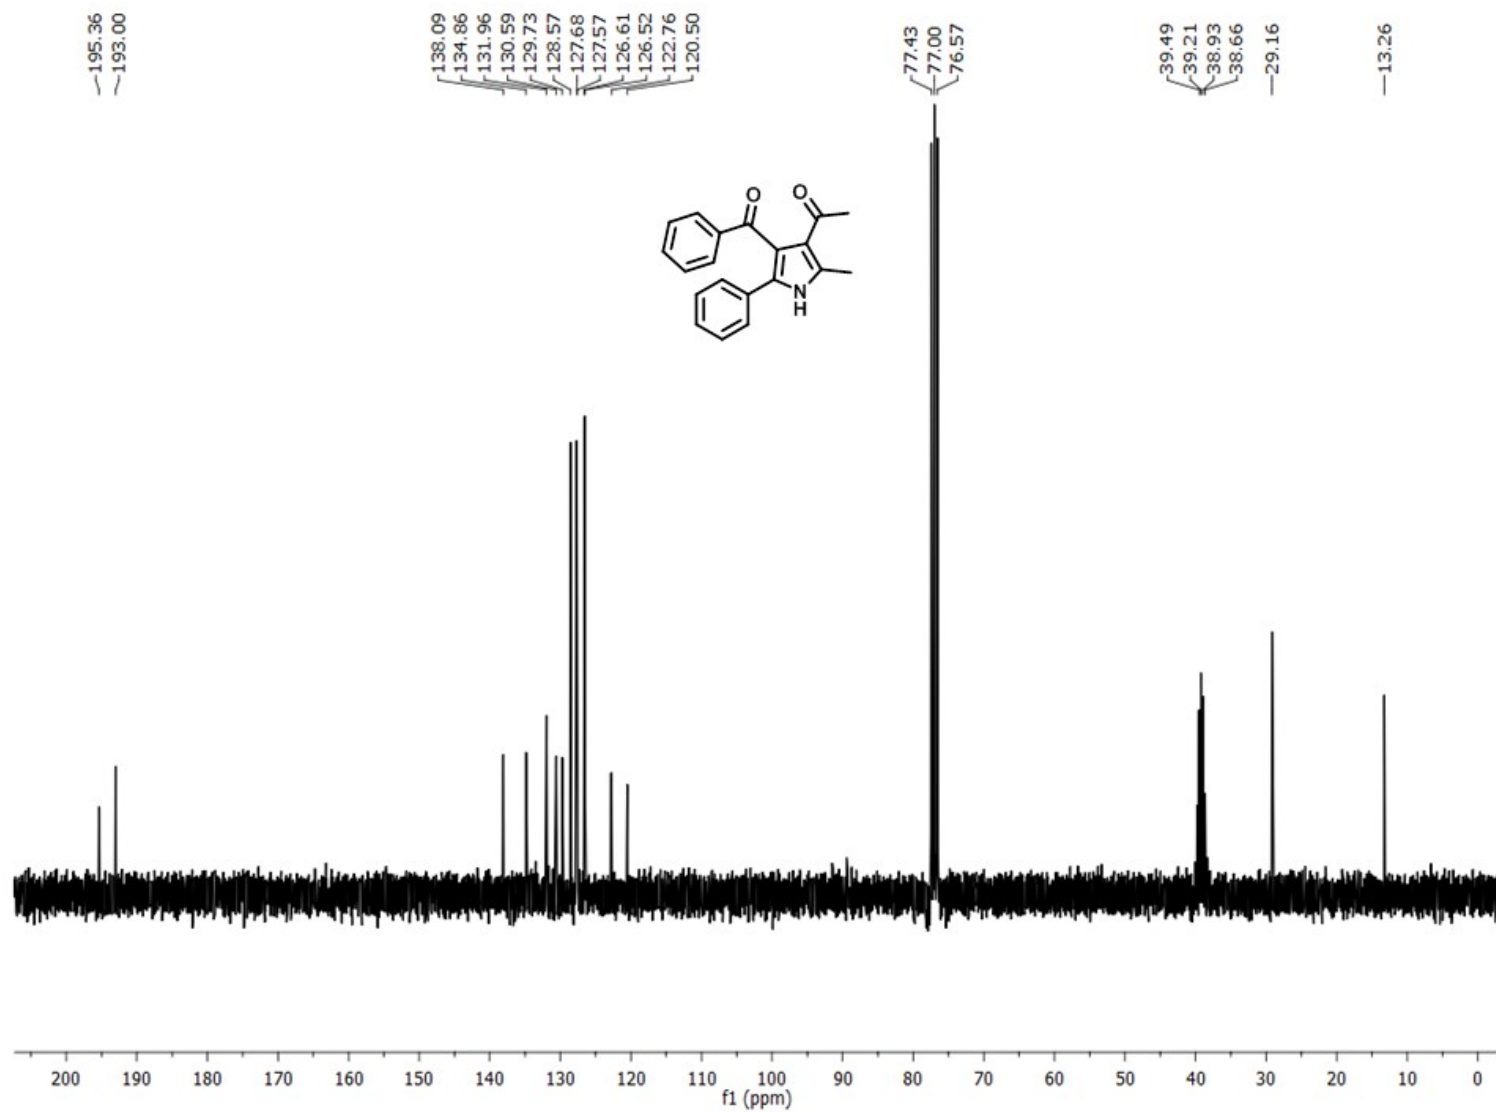

Figure 6. <sup>13</sup>C NMR spectrum of compound **2c**

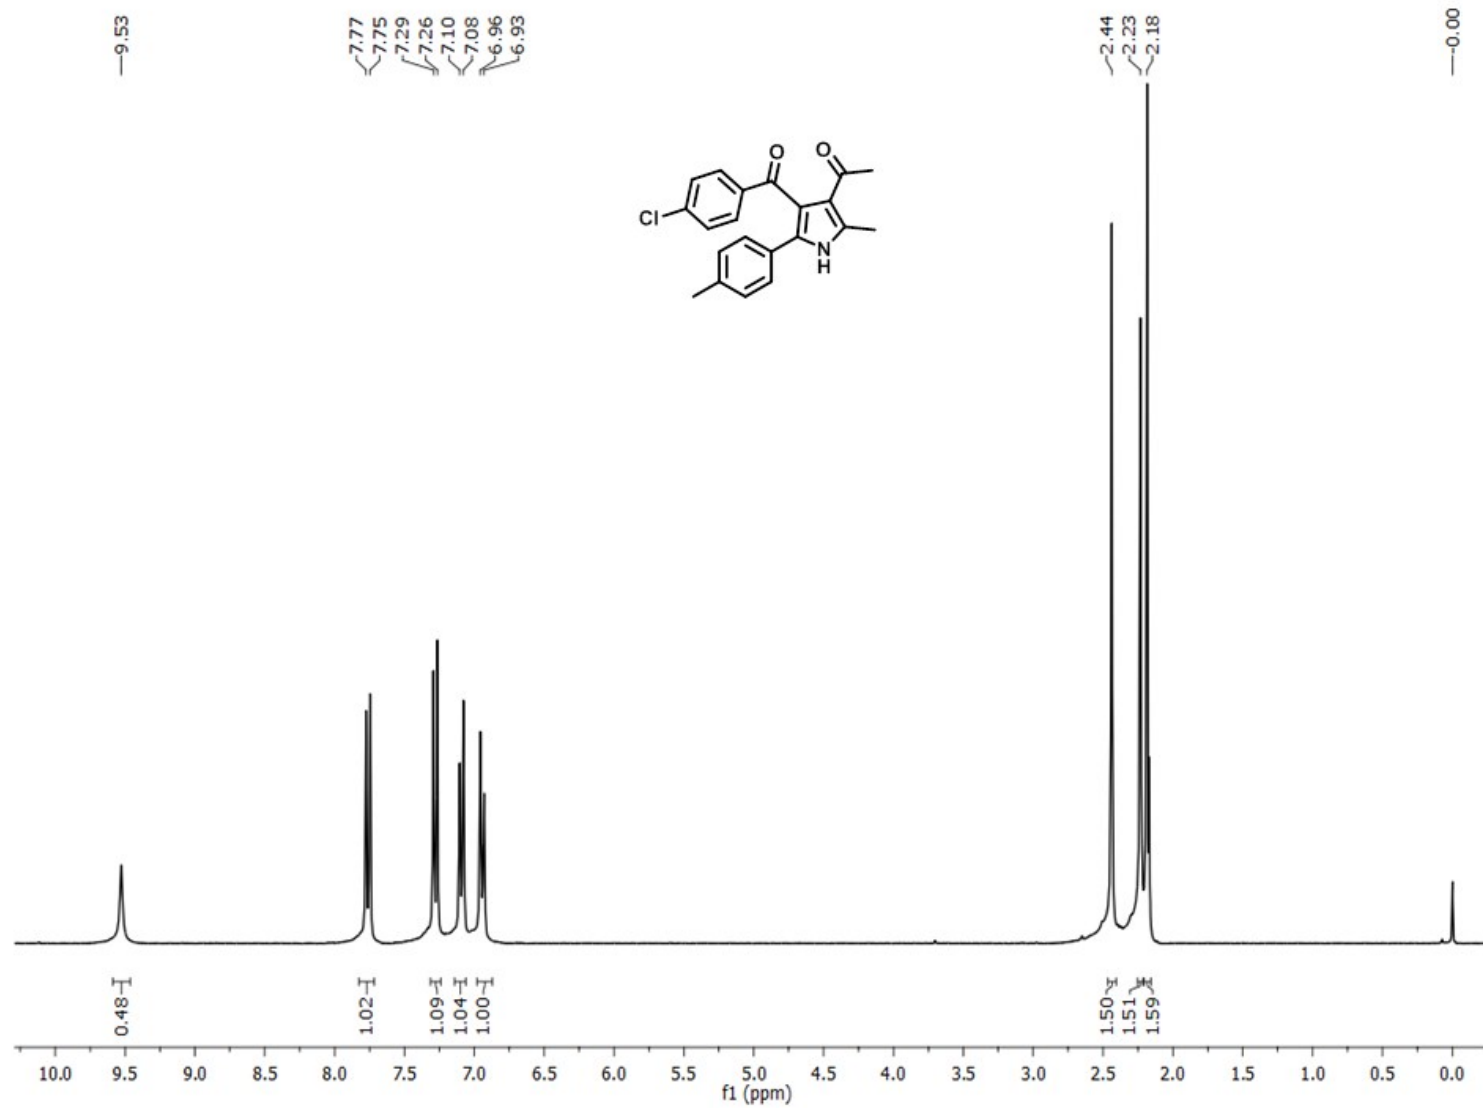

Figure 7. <sup>1</sup>H NMR spectrum of compound **2d**

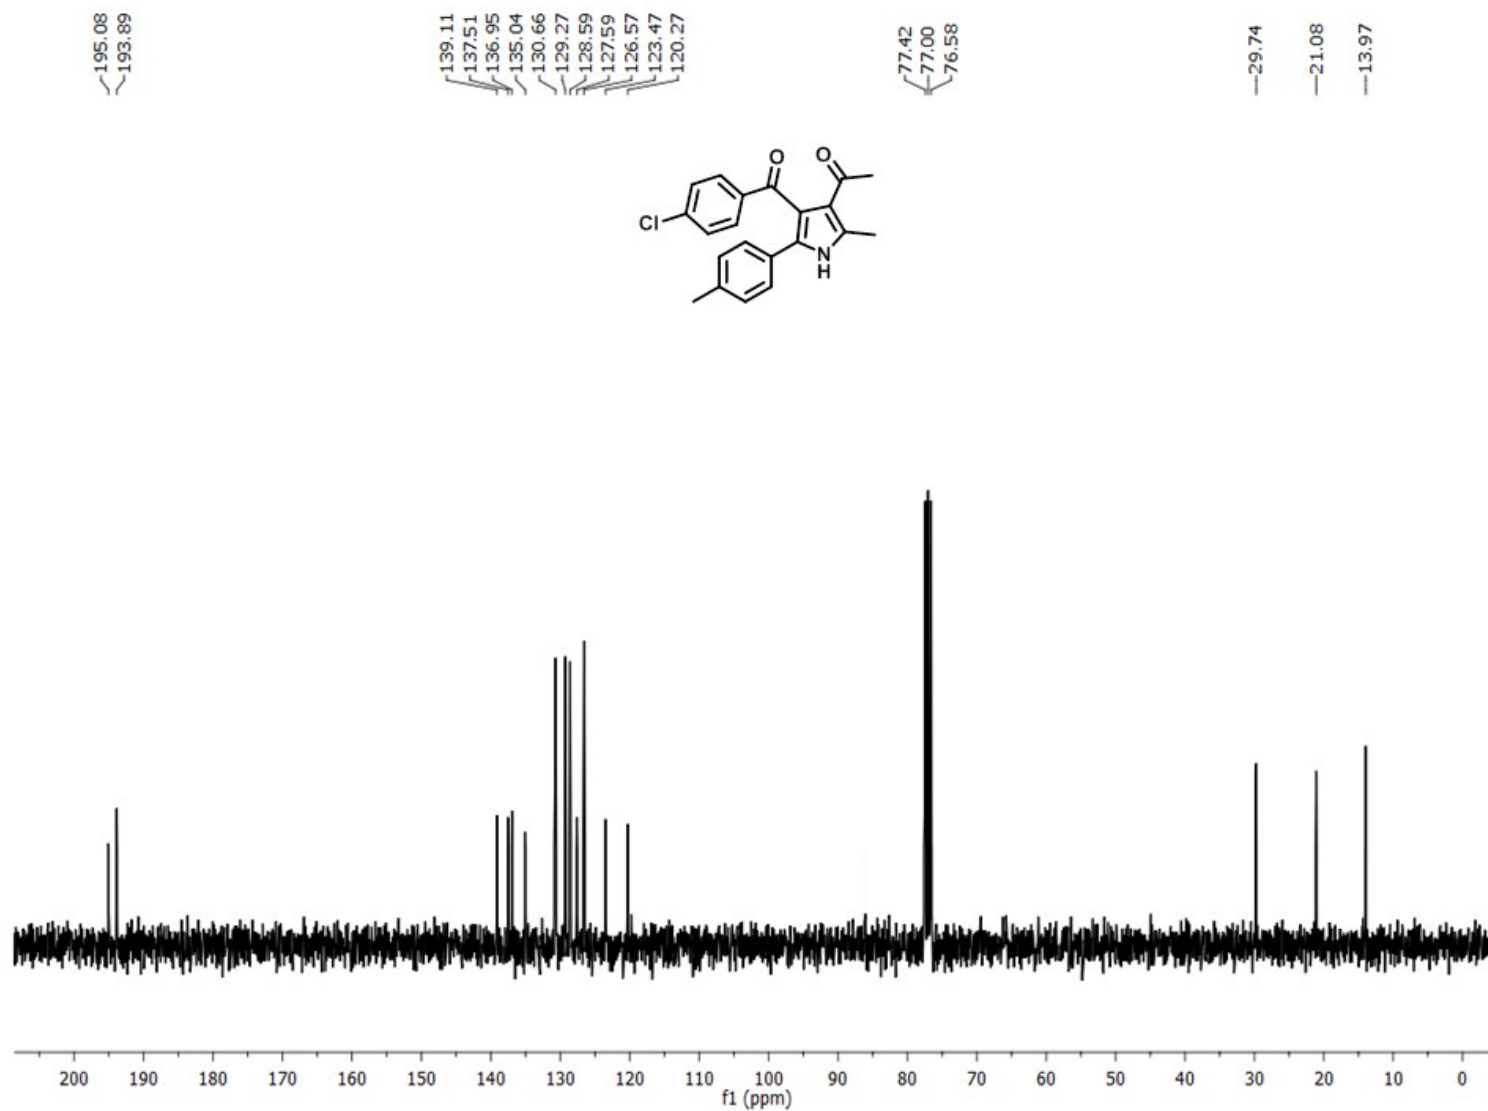

Figure 8. <sup>13</sup>C NMR spectrum of compound **2d**

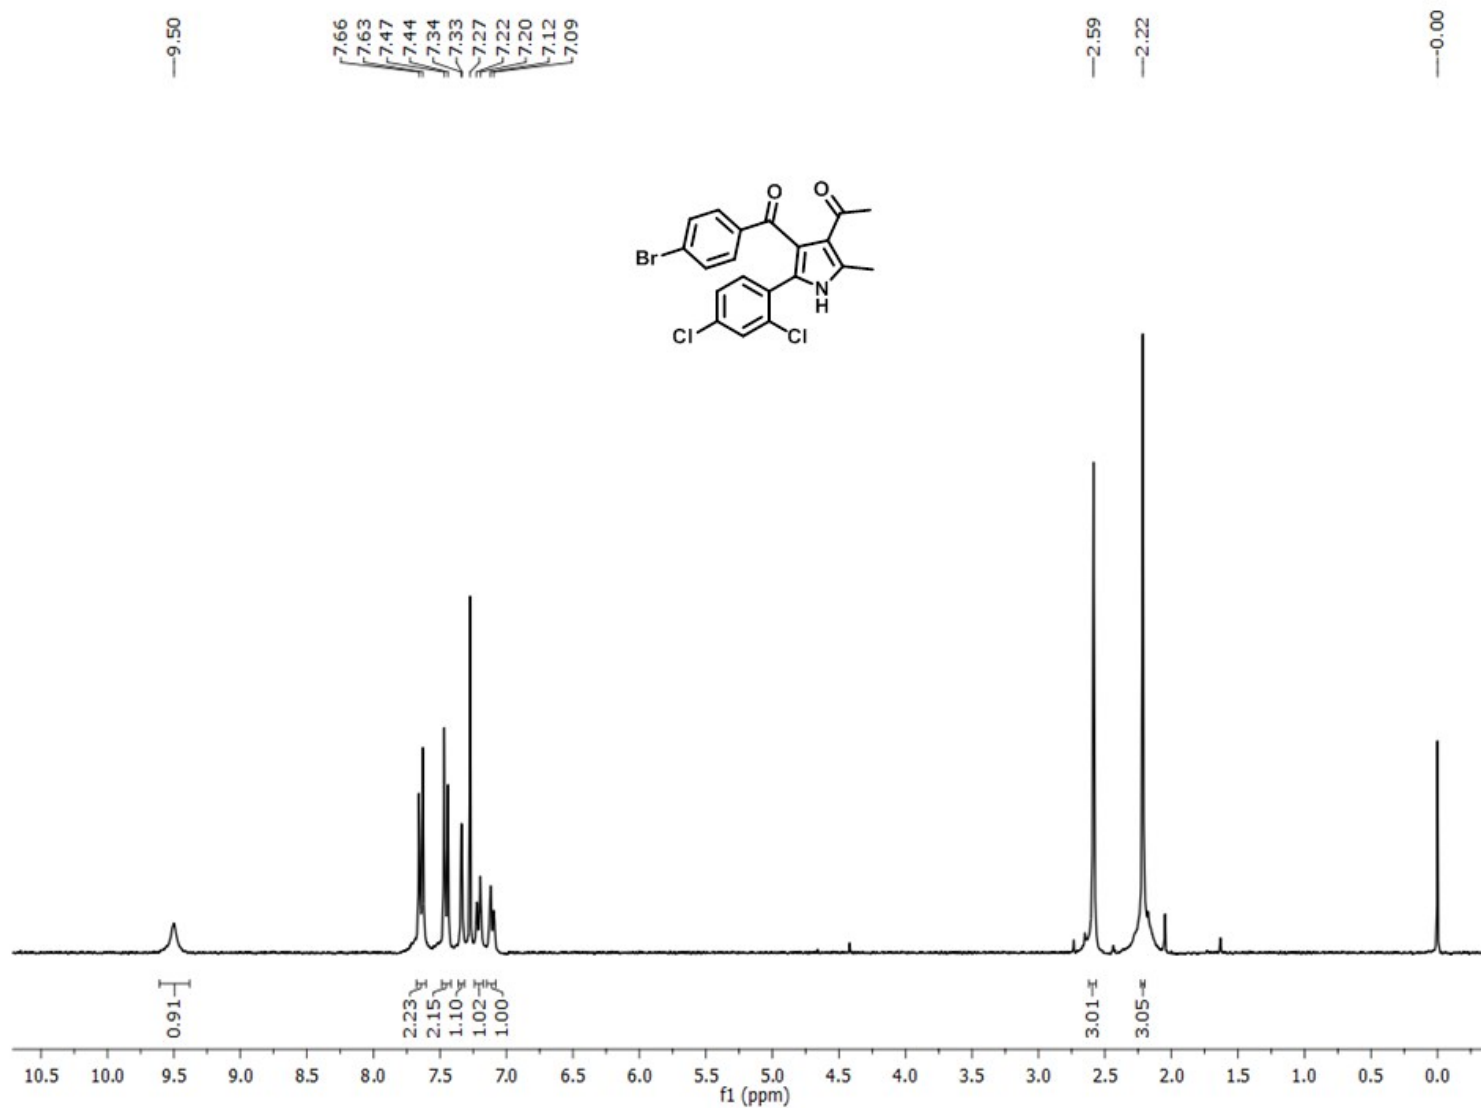

Figure 9. <sup>1</sup>H NMR spectrum of compound **2e**



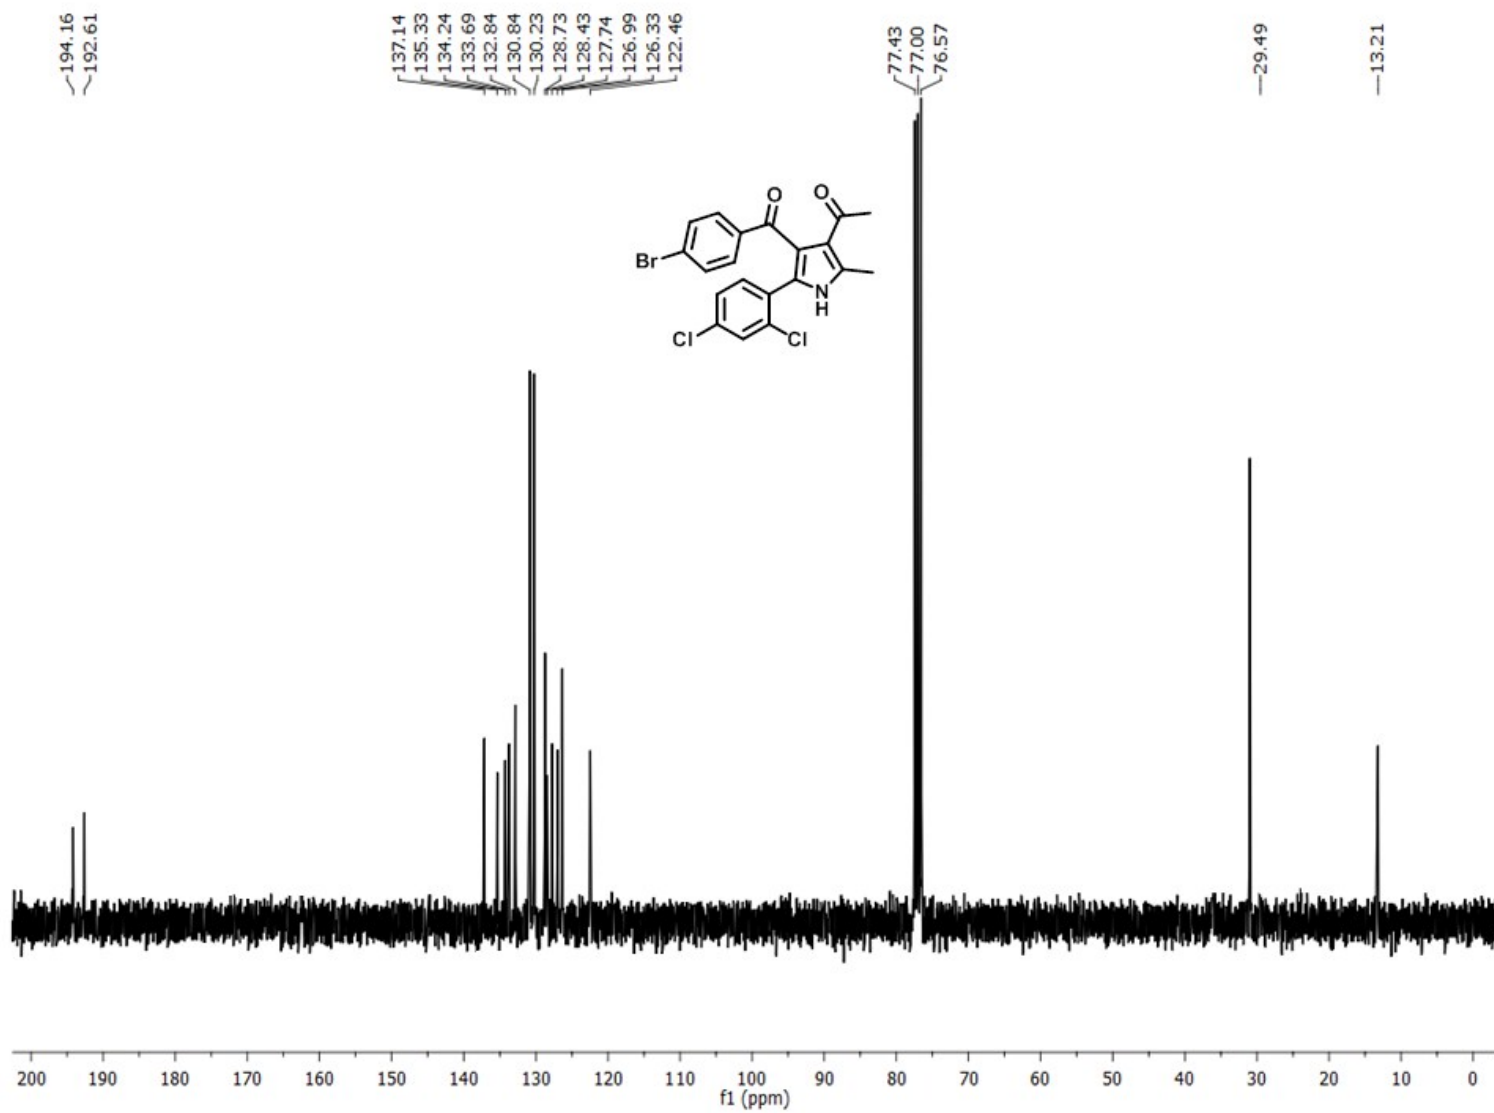

Figure 10. <sup>13</sup>C NMR spectrum of compound 2e

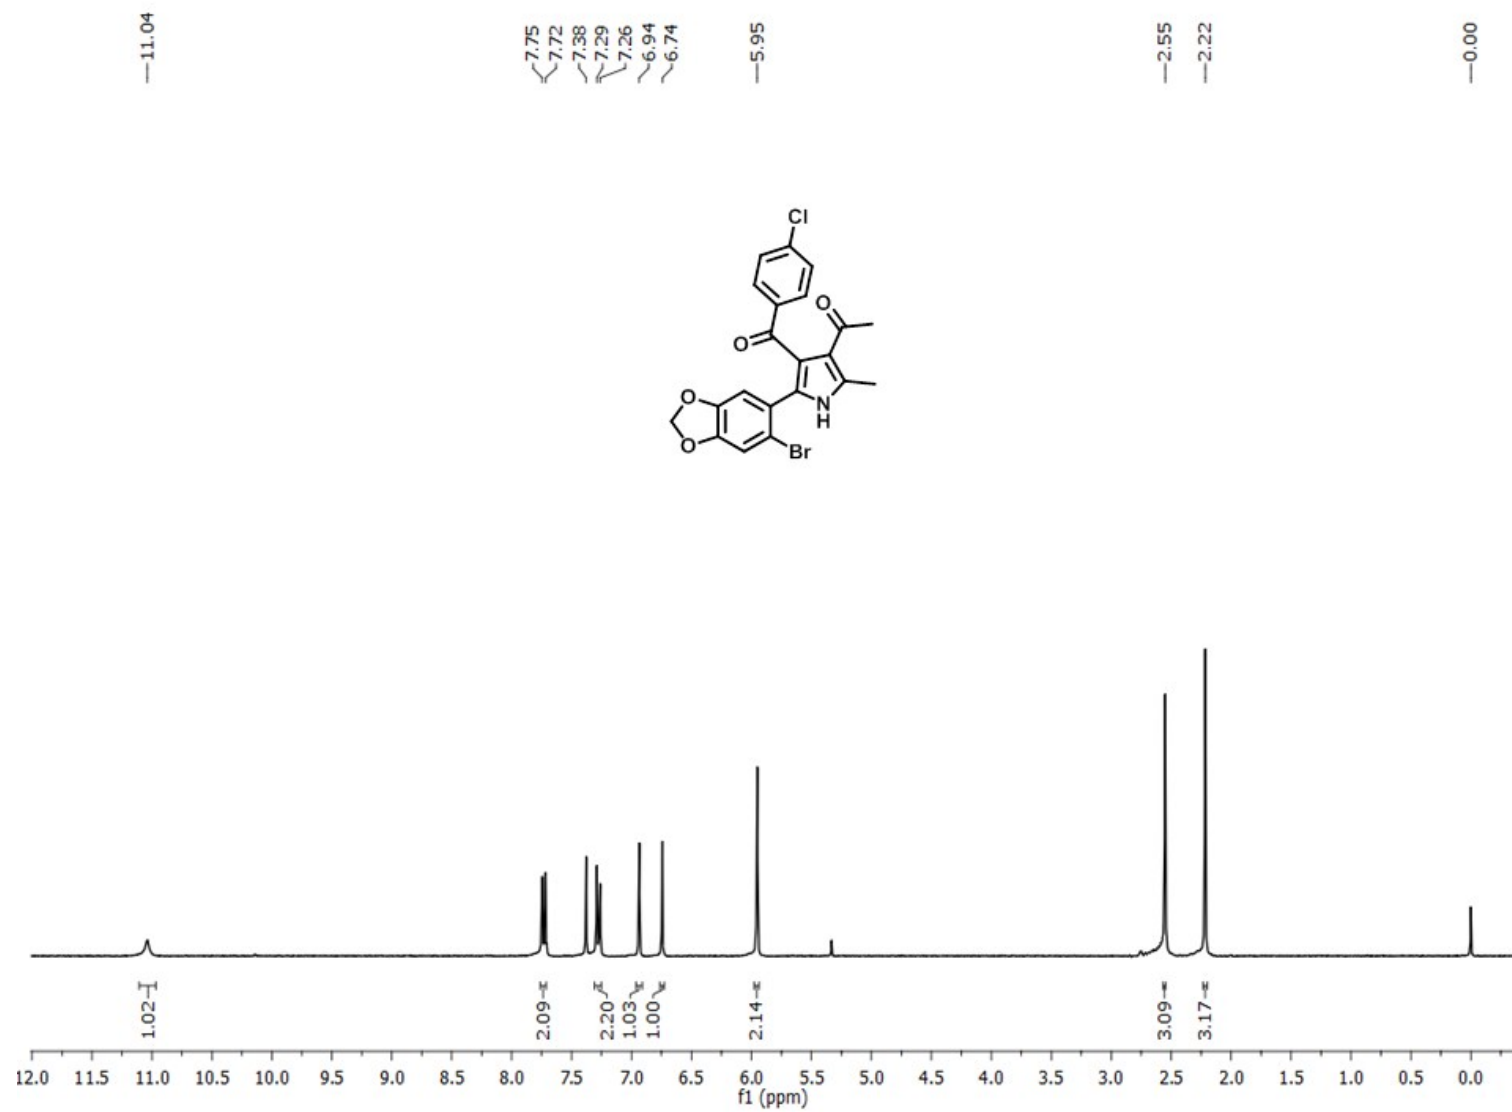

Figure 11. <sup>1</sup>H NMR spectrum of compound **2f**

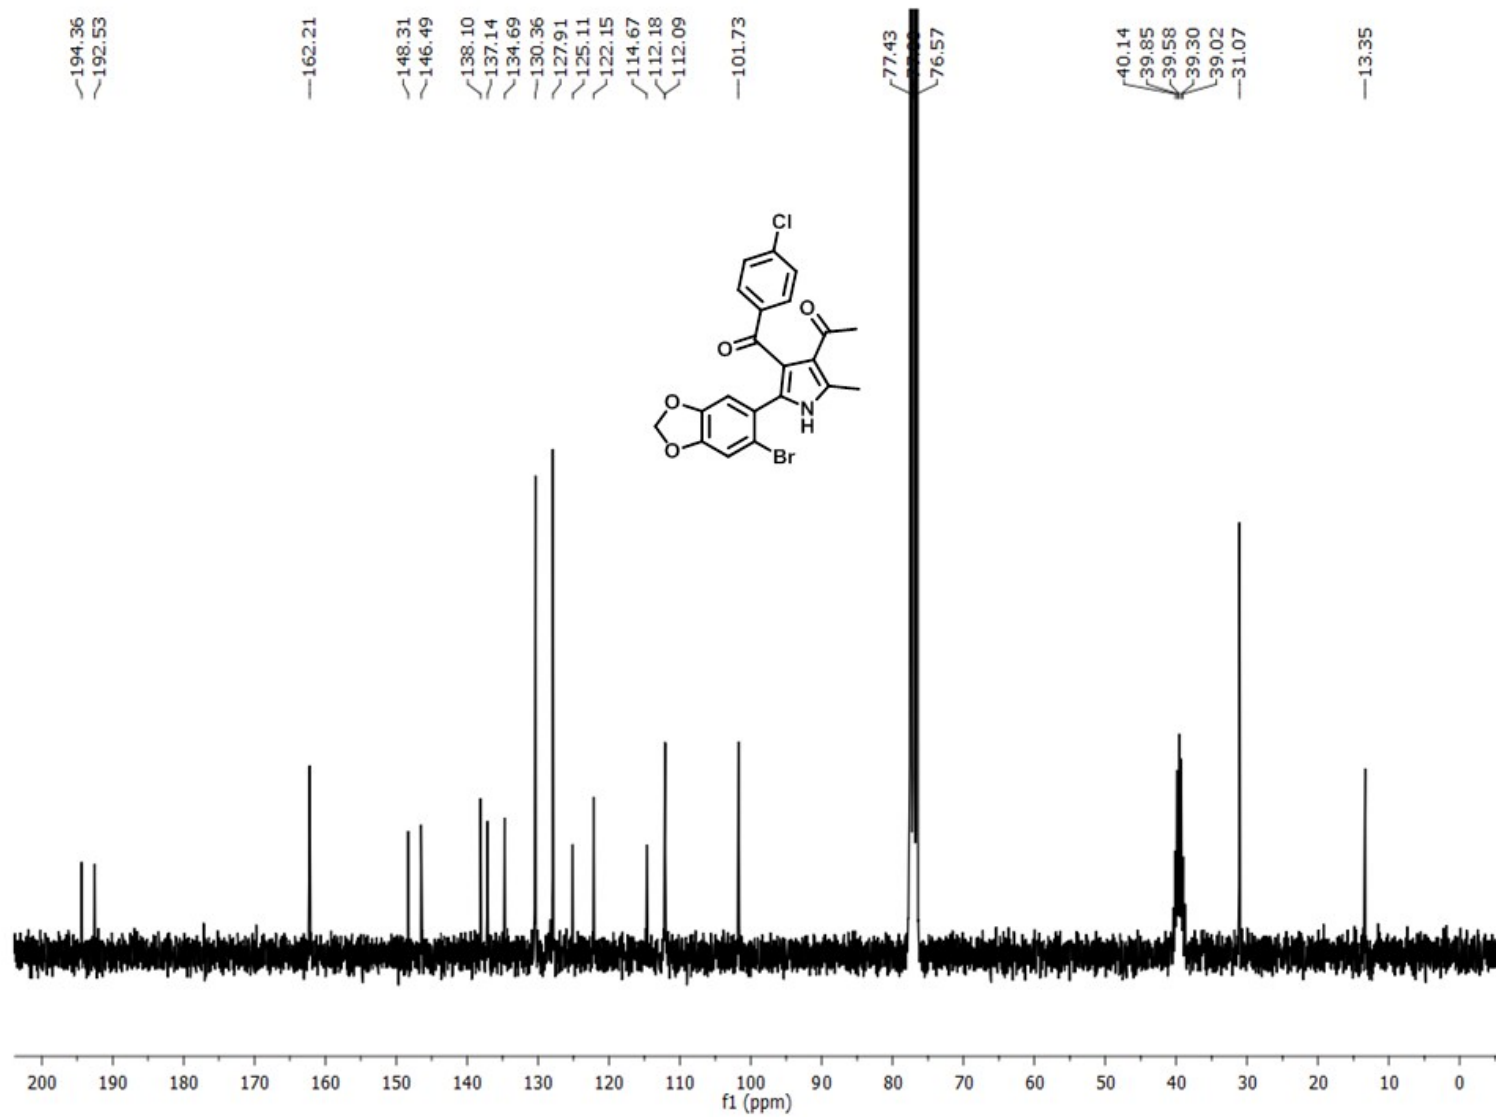

Figure 12. <sup>13</sup>C NMR spectrum of compound **2f**

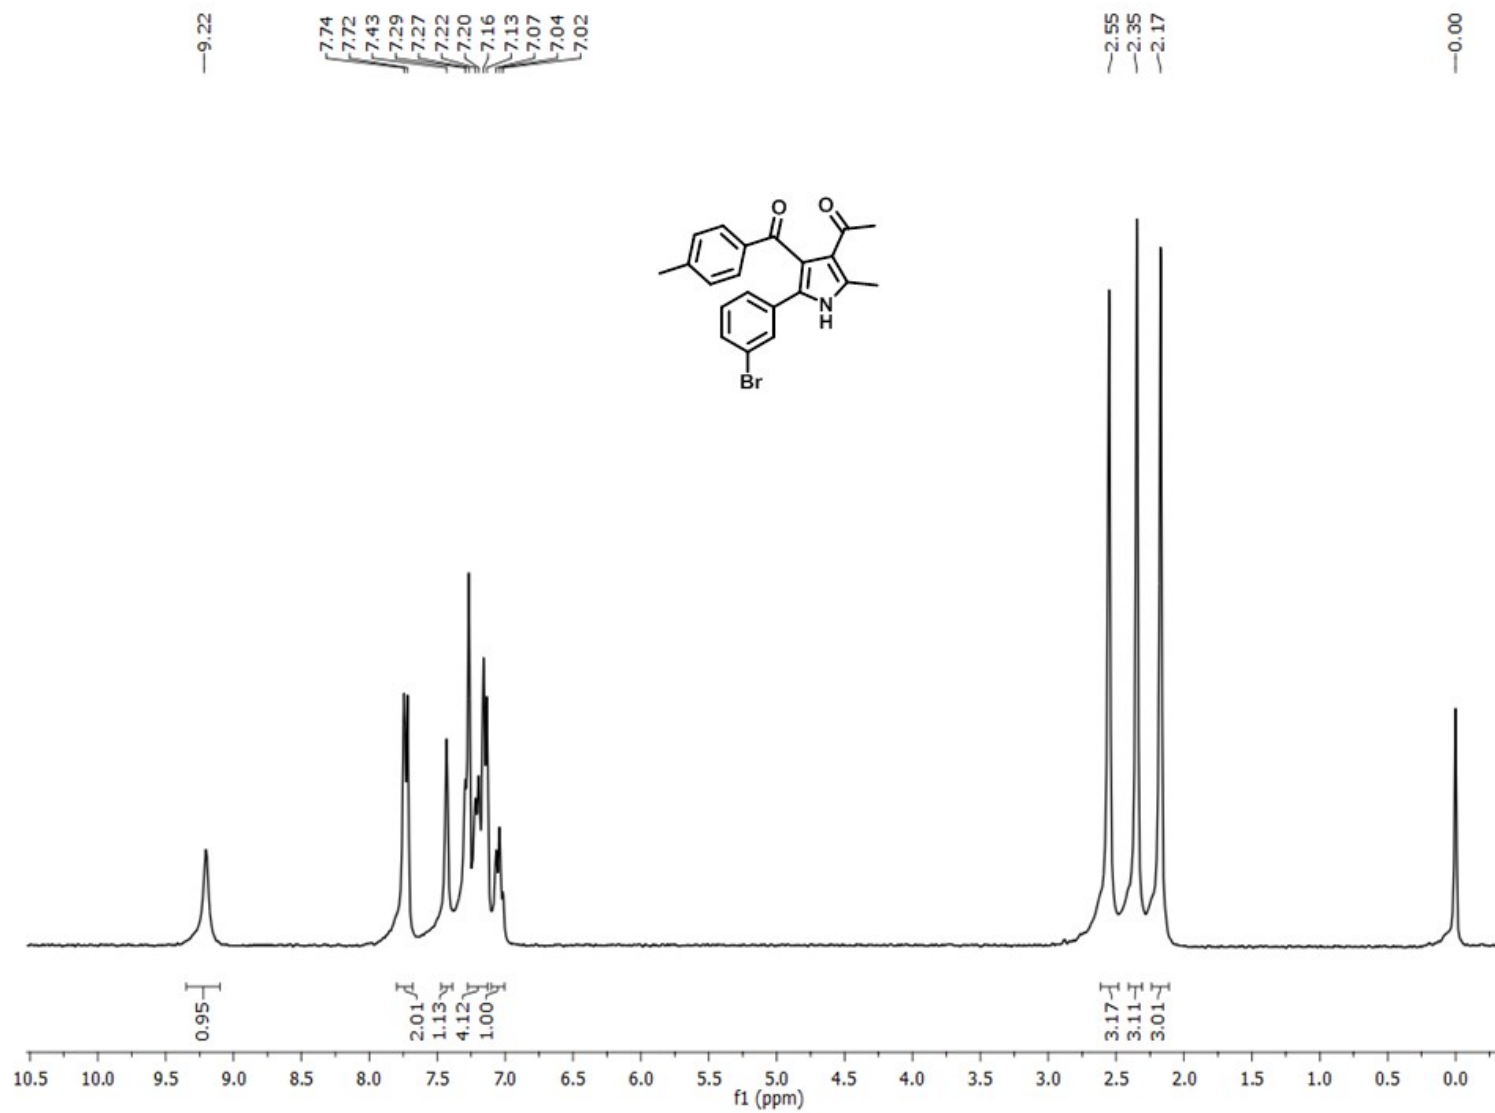

Figure 13. <sup>1</sup>H NMR spectrum of compound **2g**

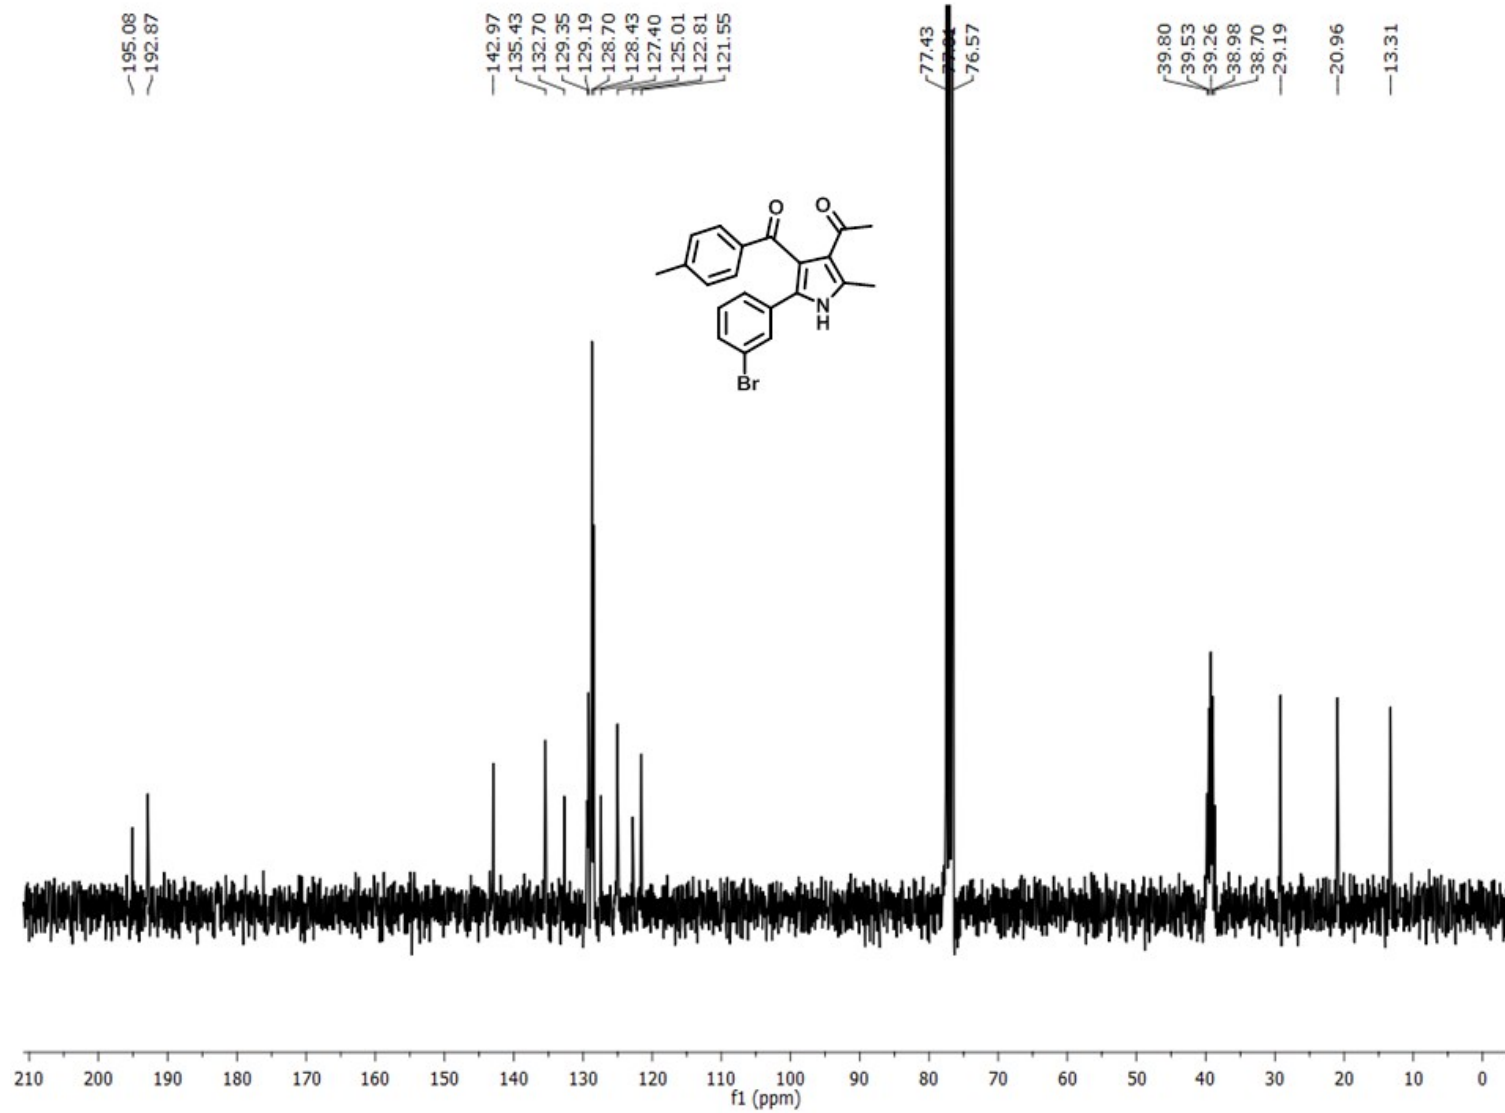

Figure 14.  $^{13}\text{C}$  NMR spectrum of compound **2g**

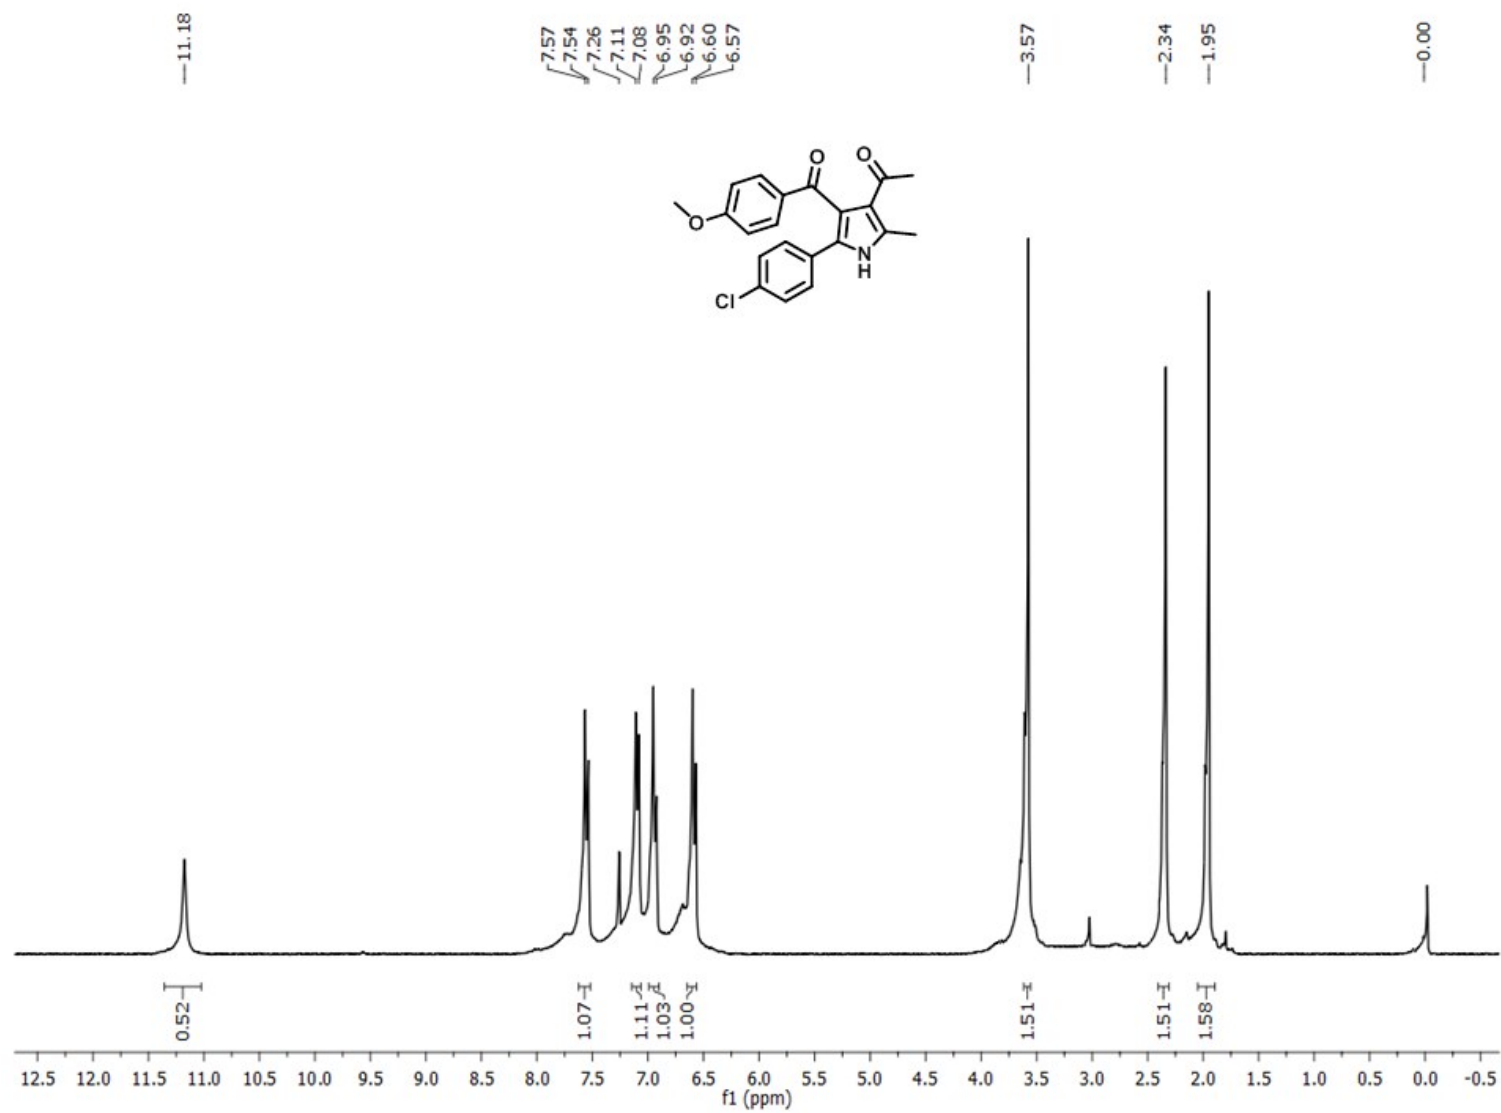

Figure 15. <sup>1</sup>H NMR spectrum of compound **2h**

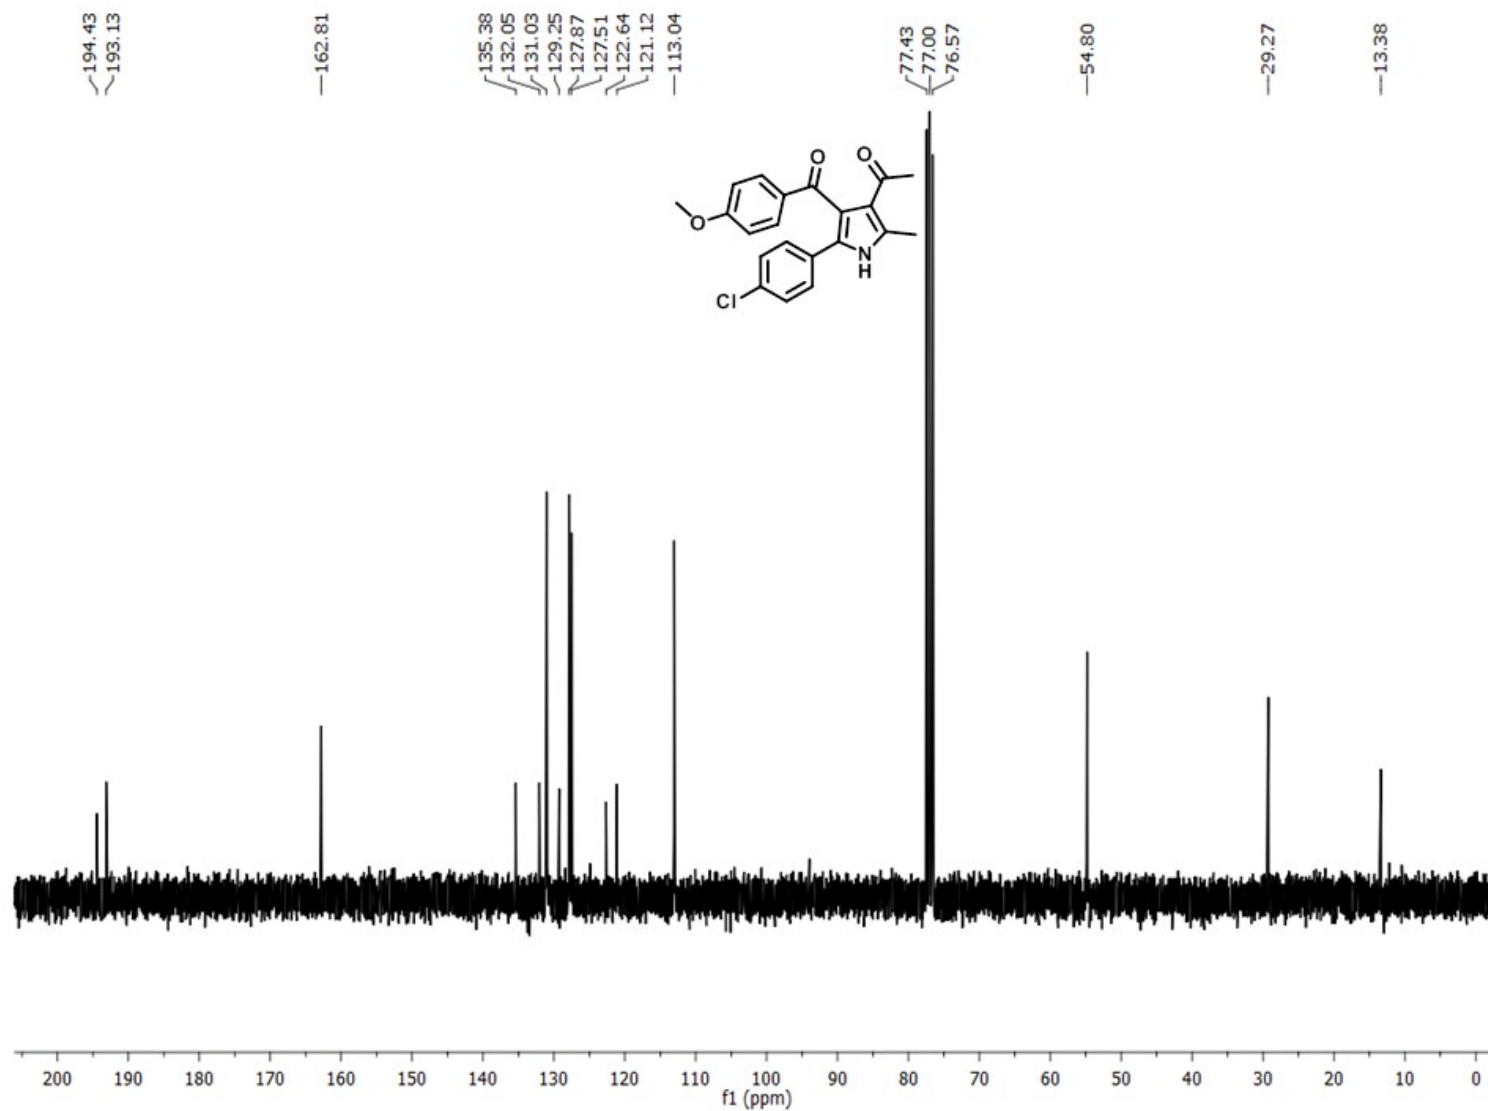

Figure 16. <sup>13</sup>C NMR spectrum of compound **2h**

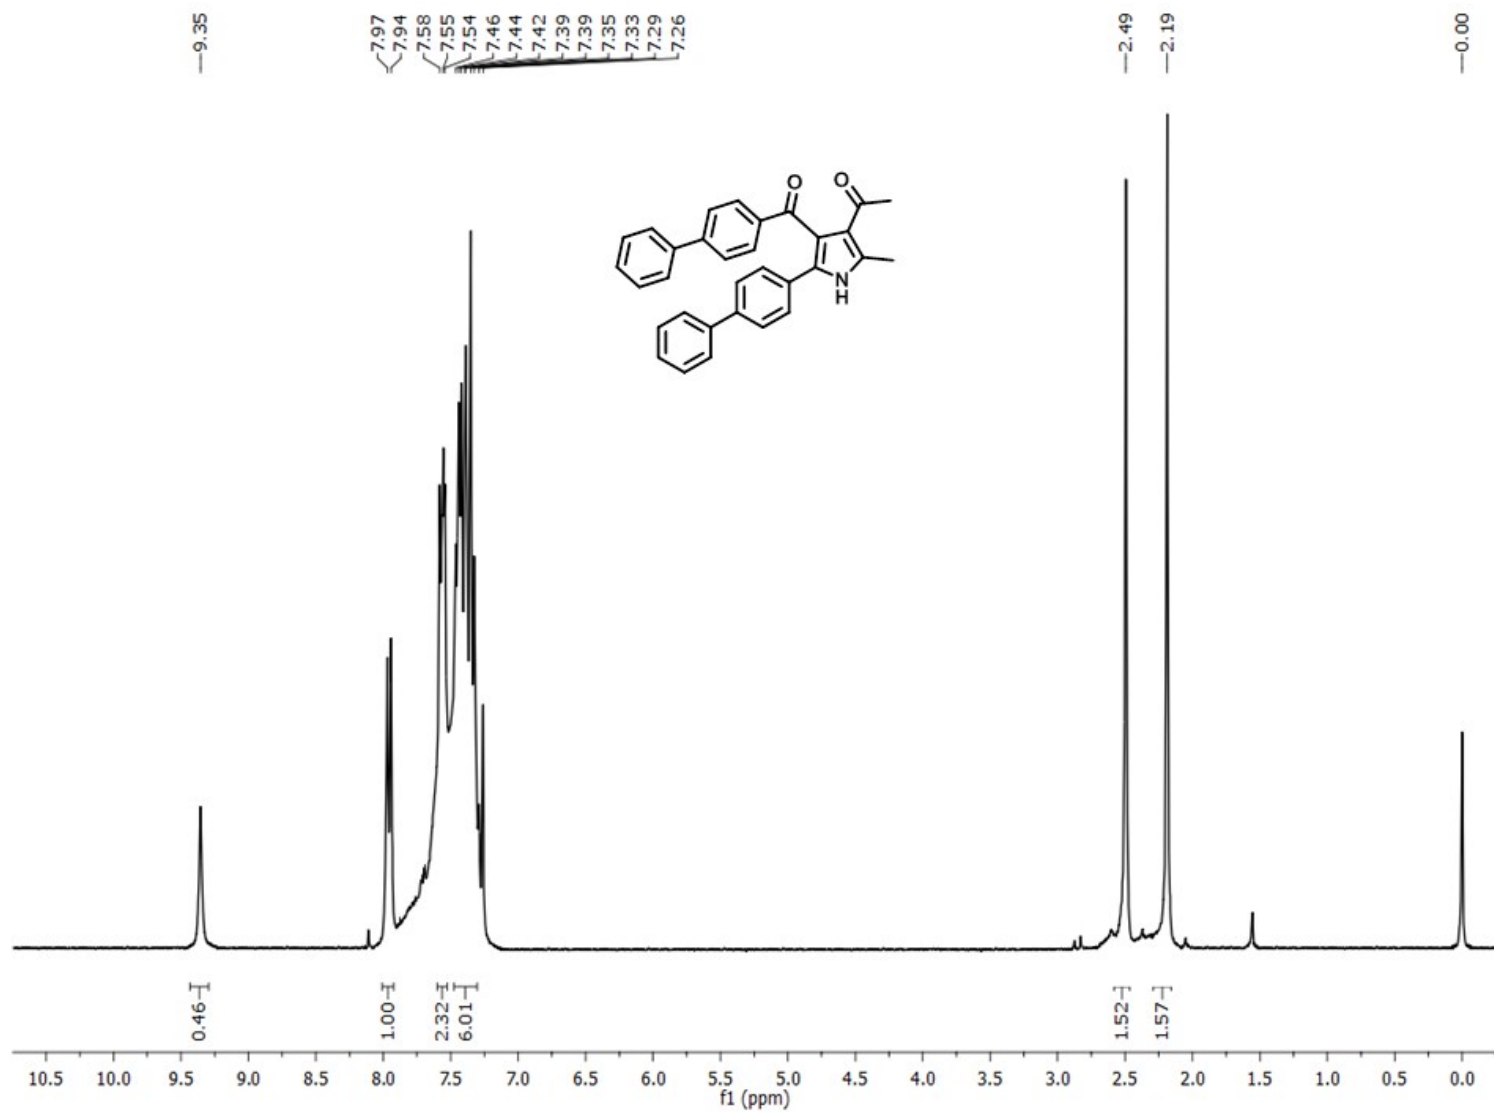

Figure 17. <sup>1</sup>H NMR spectrum of compound **2i**



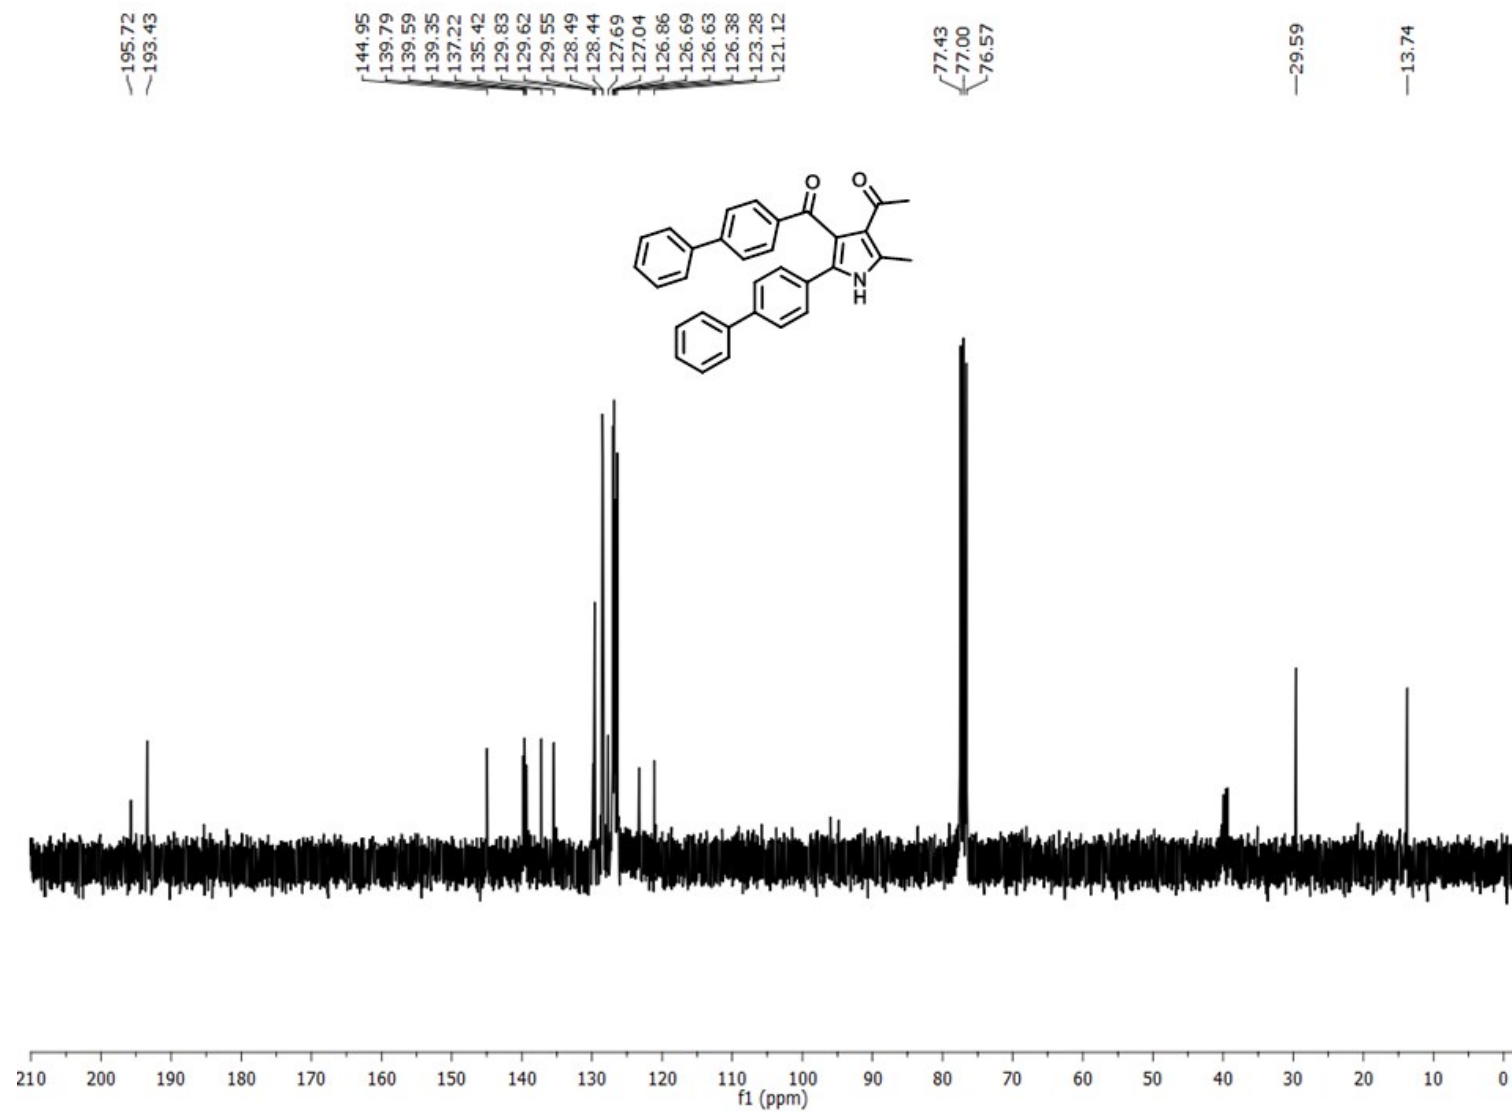

Figure 18.  $^{13}\text{C}$  NMR spectrum of compound **2i**

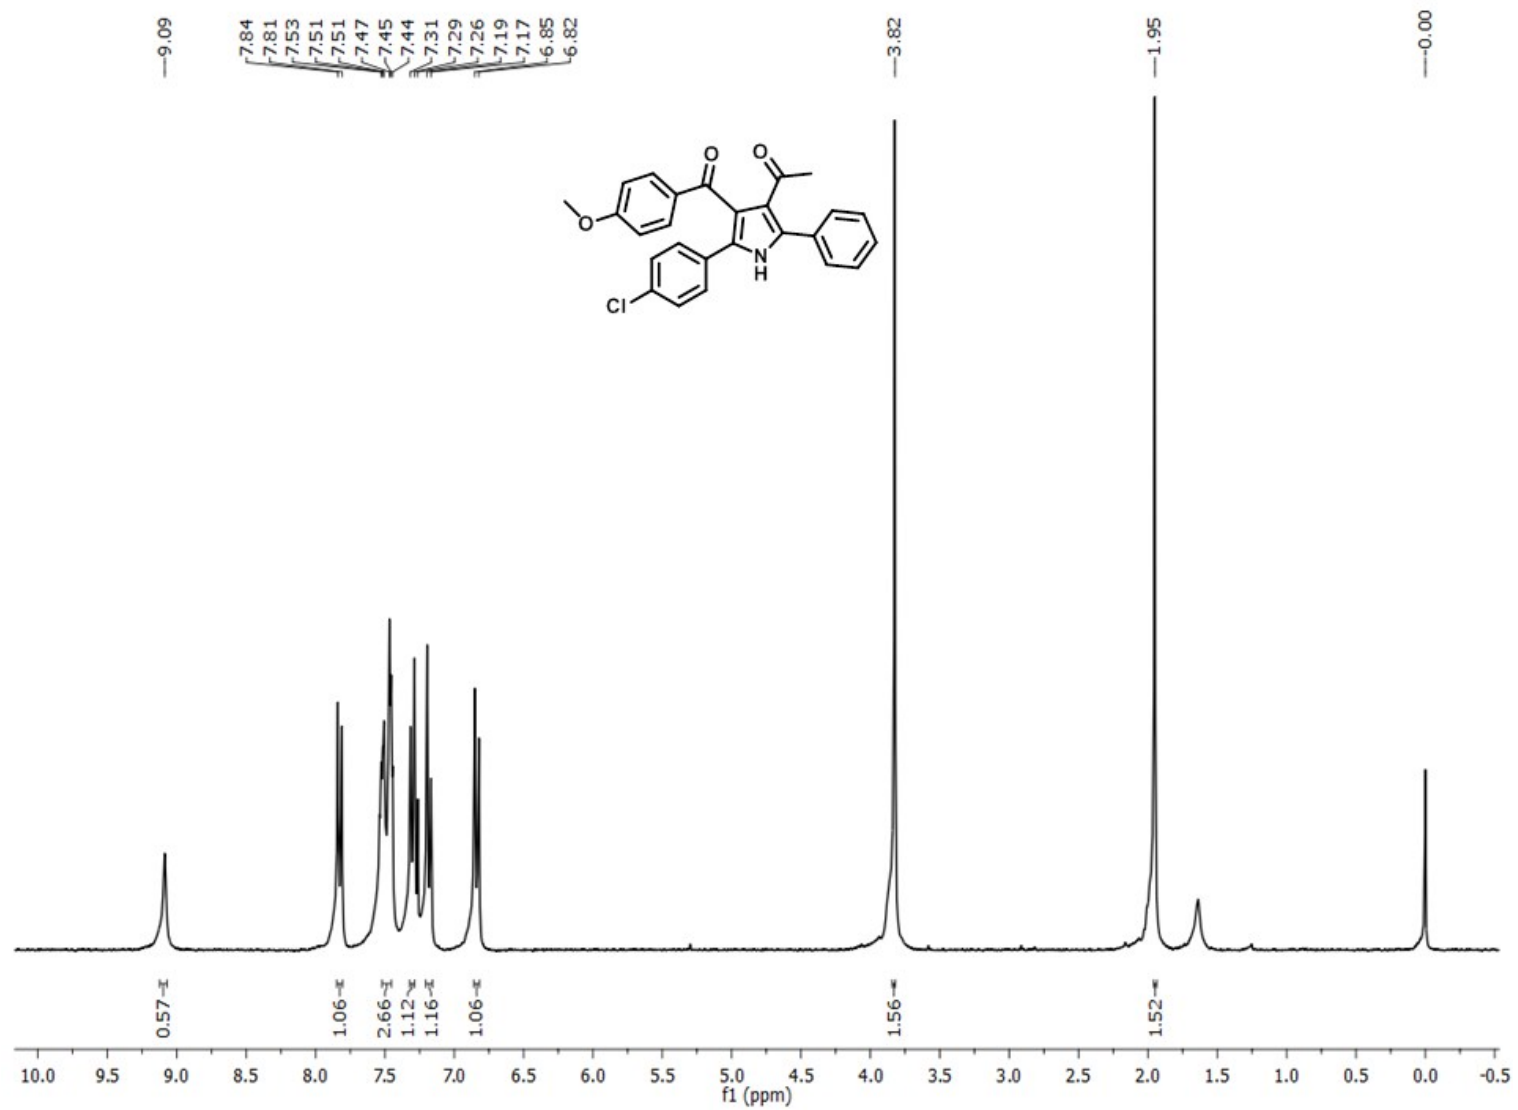

Figure 19. <sup>1</sup>H NMR spectrum of compound **2j**

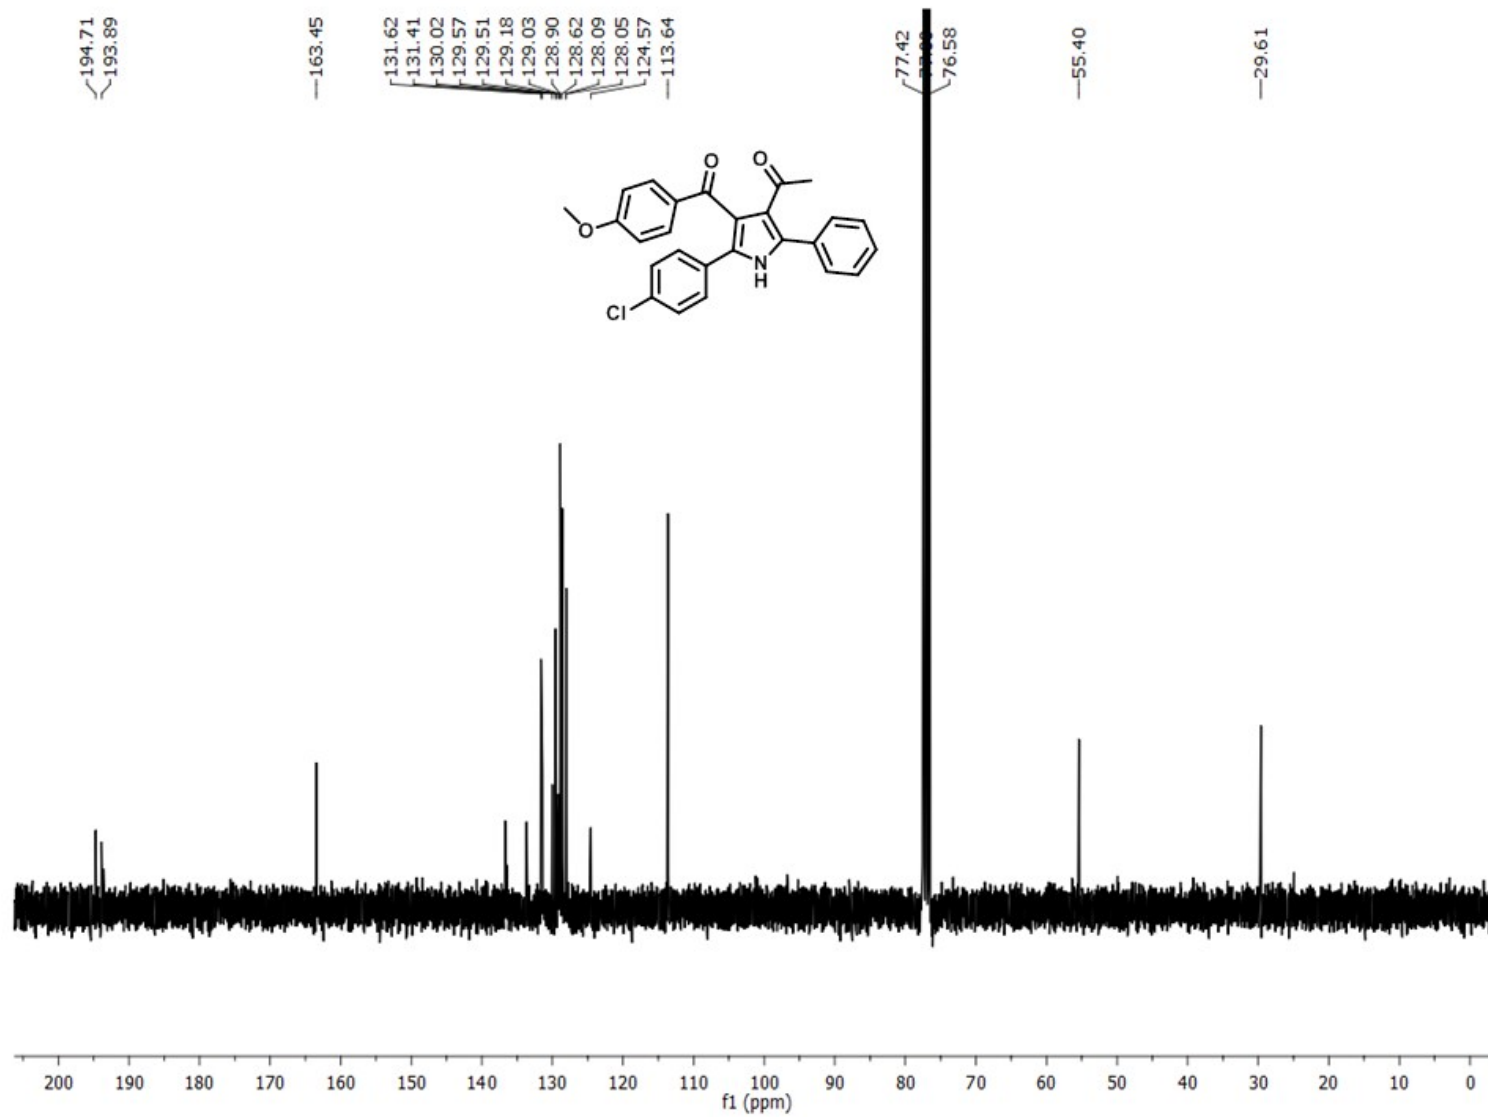

Figure 20. <sup>13</sup>C NMR spectrum of compound **2j**

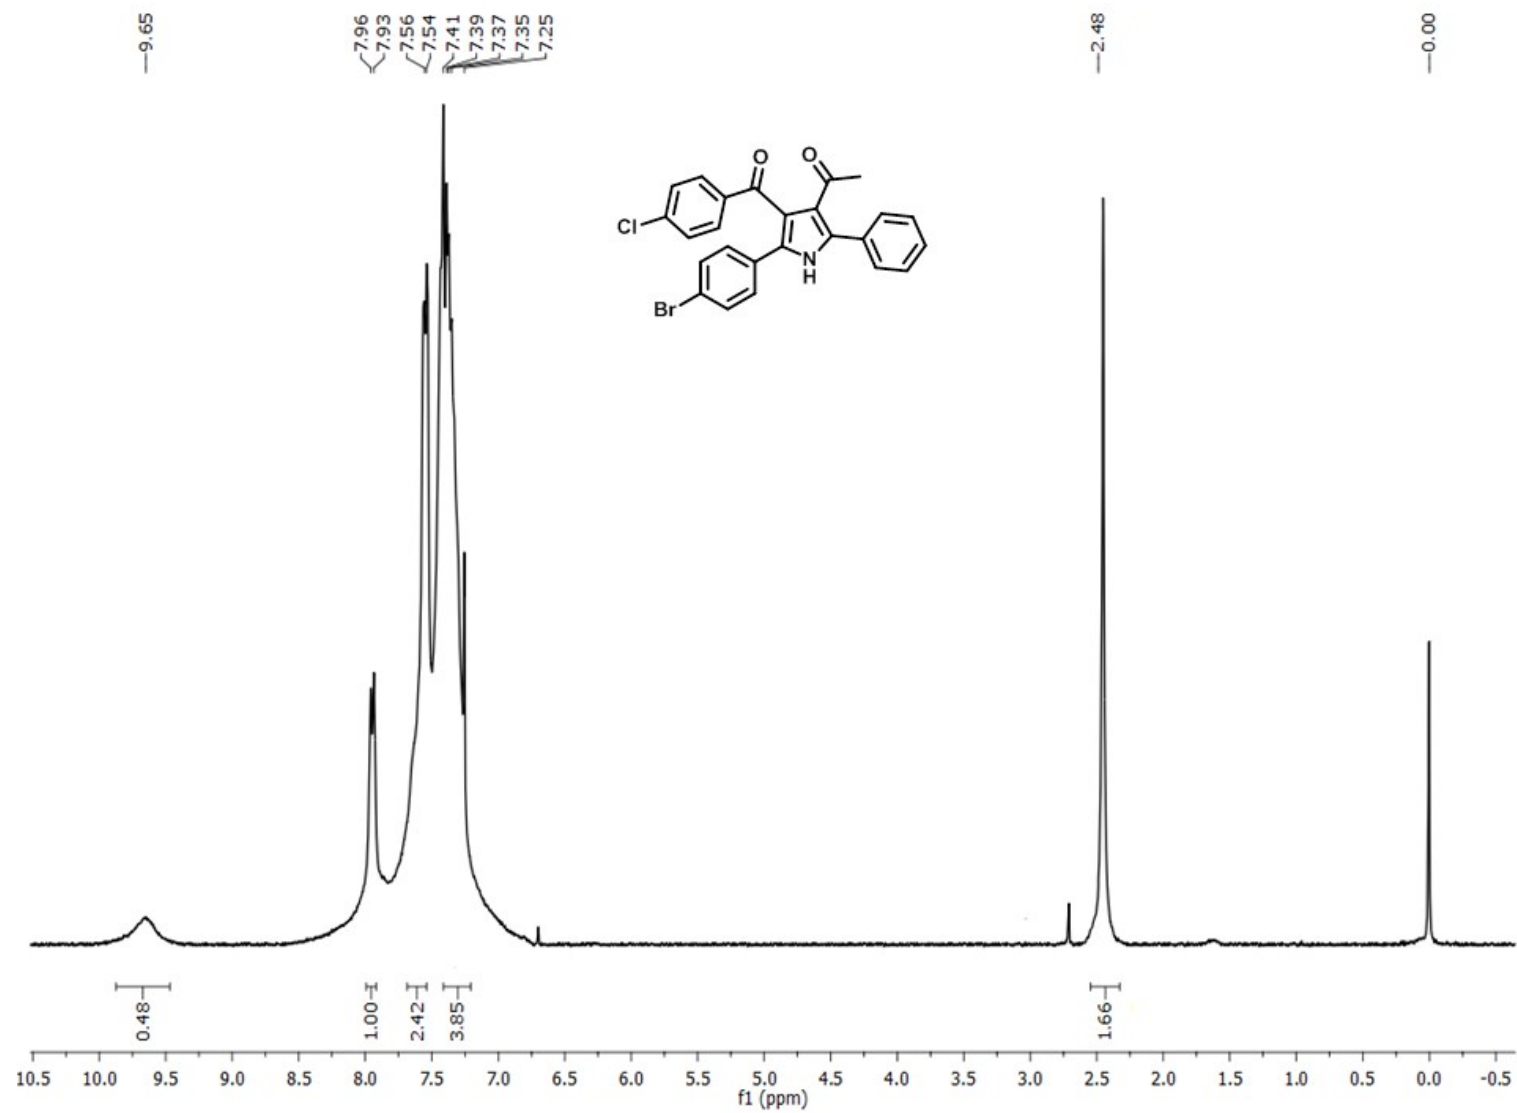

Figure 21. <sup>1</sup>H NMR spectrum of compound **2k**

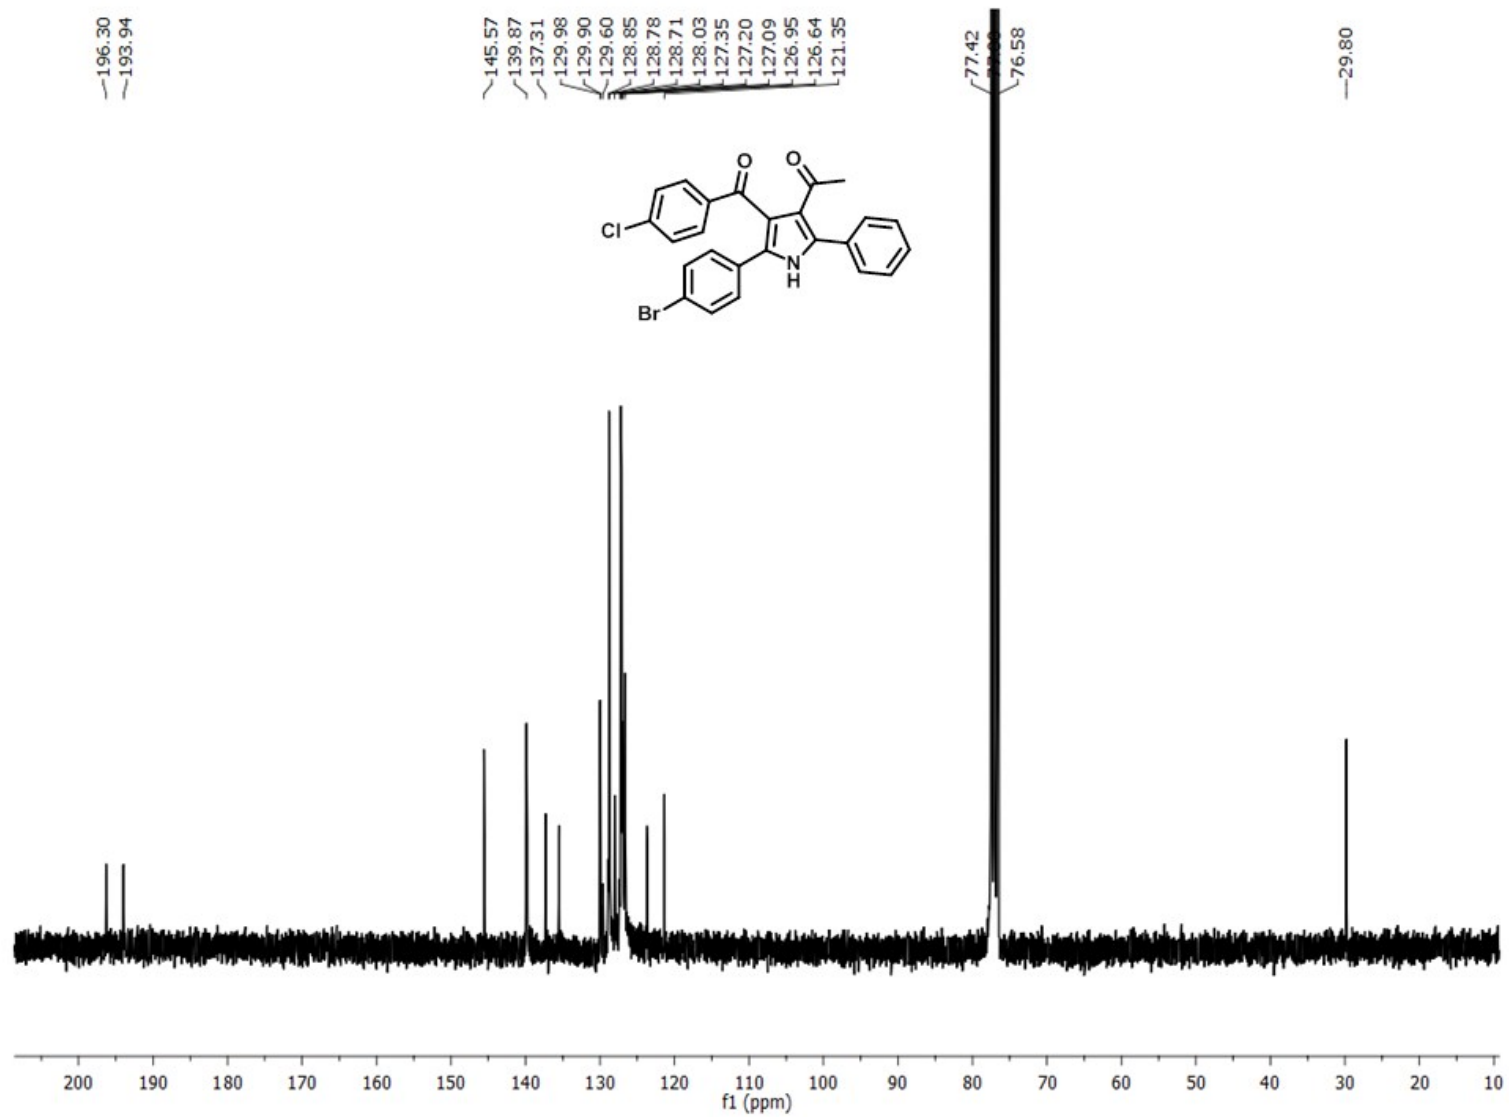

Figure 22. <sup>13</sup>C NMR spectrum of compound **2k**

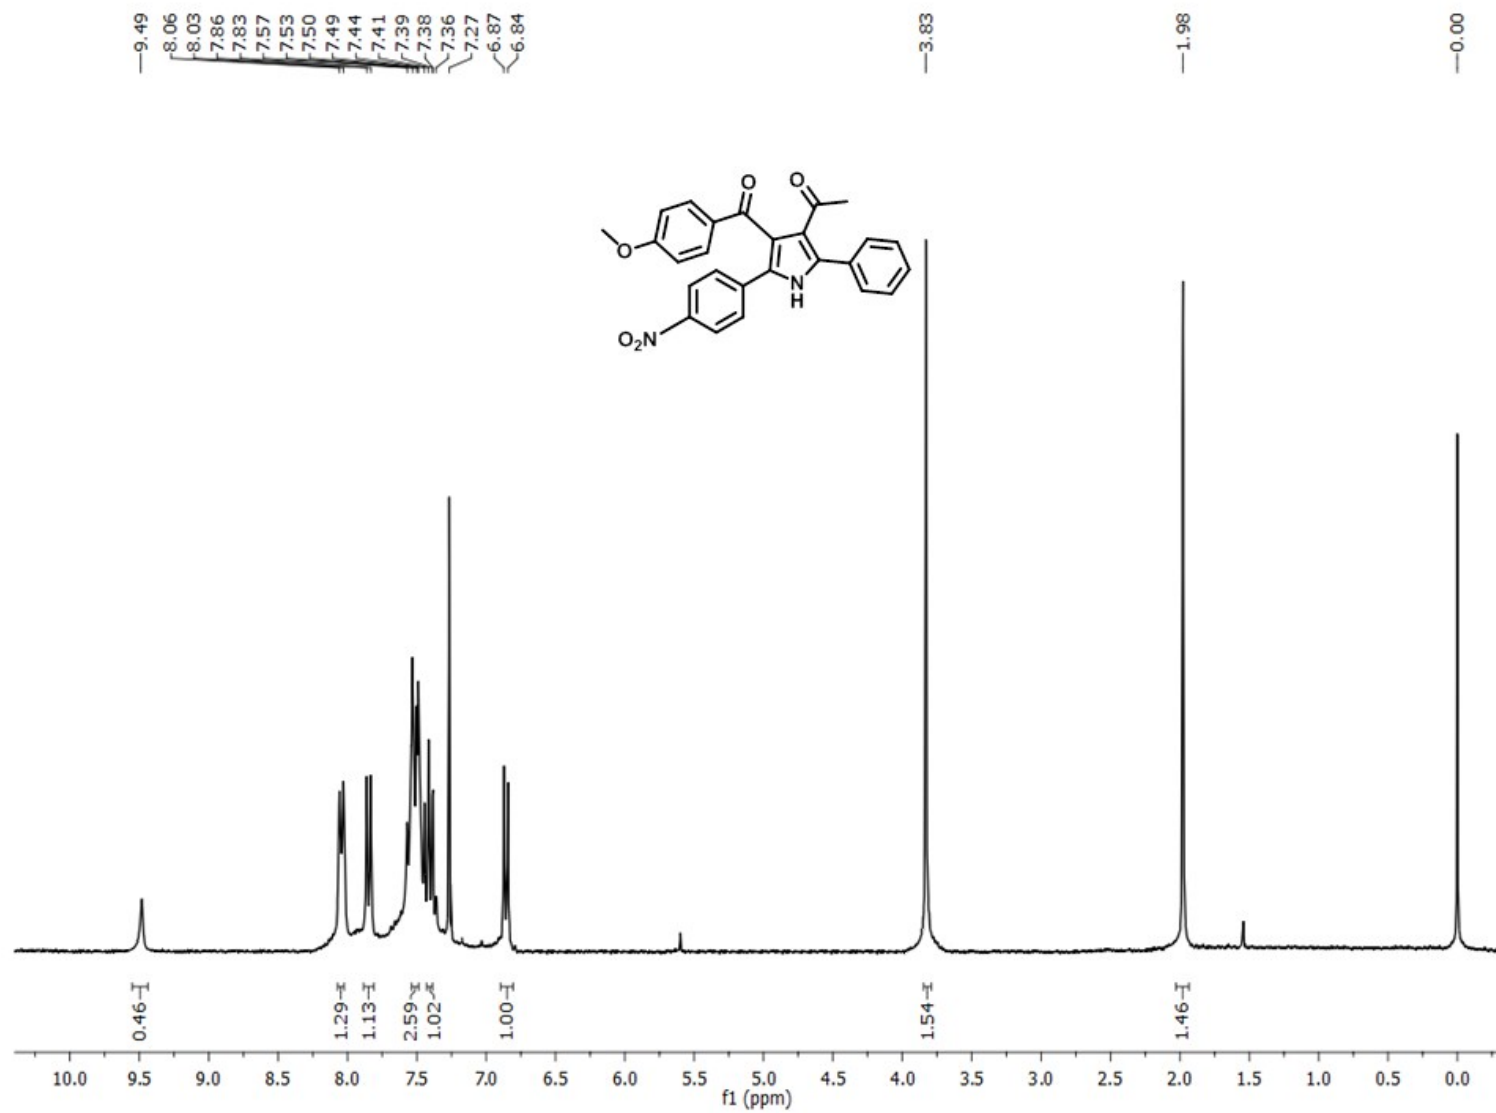

Figure 23. <sup>1</sup>H NMR spectrum of compound **21**

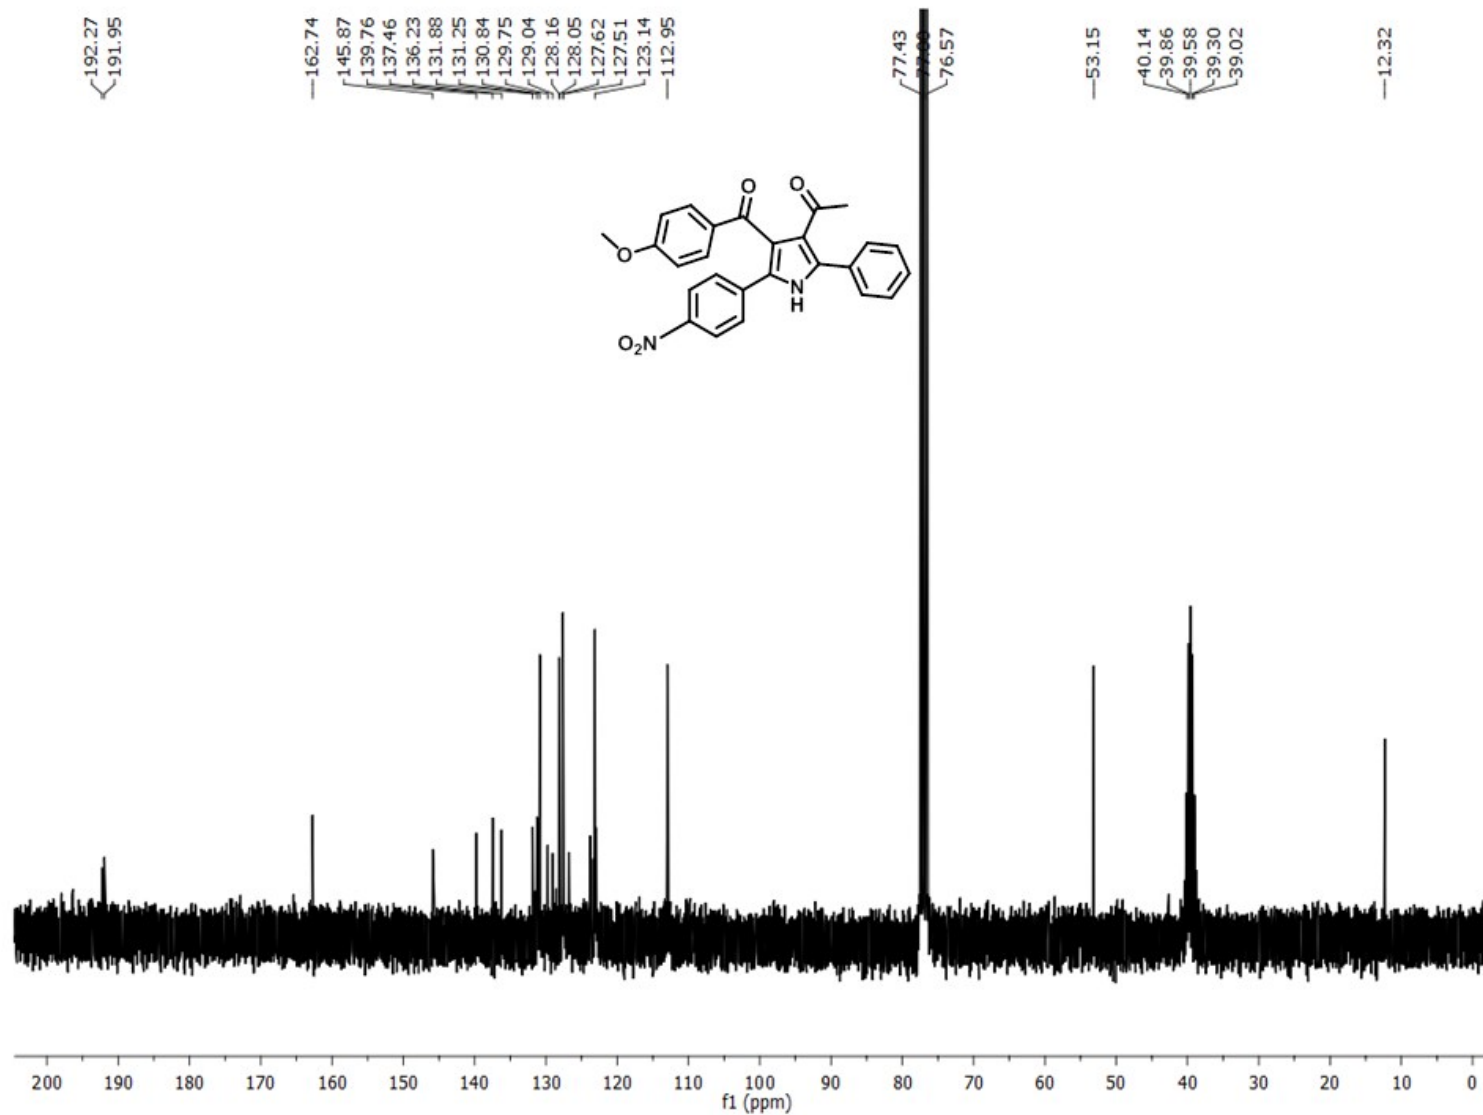

Figure 24. <sup>13</sup>C NMR spectrum of compound 21

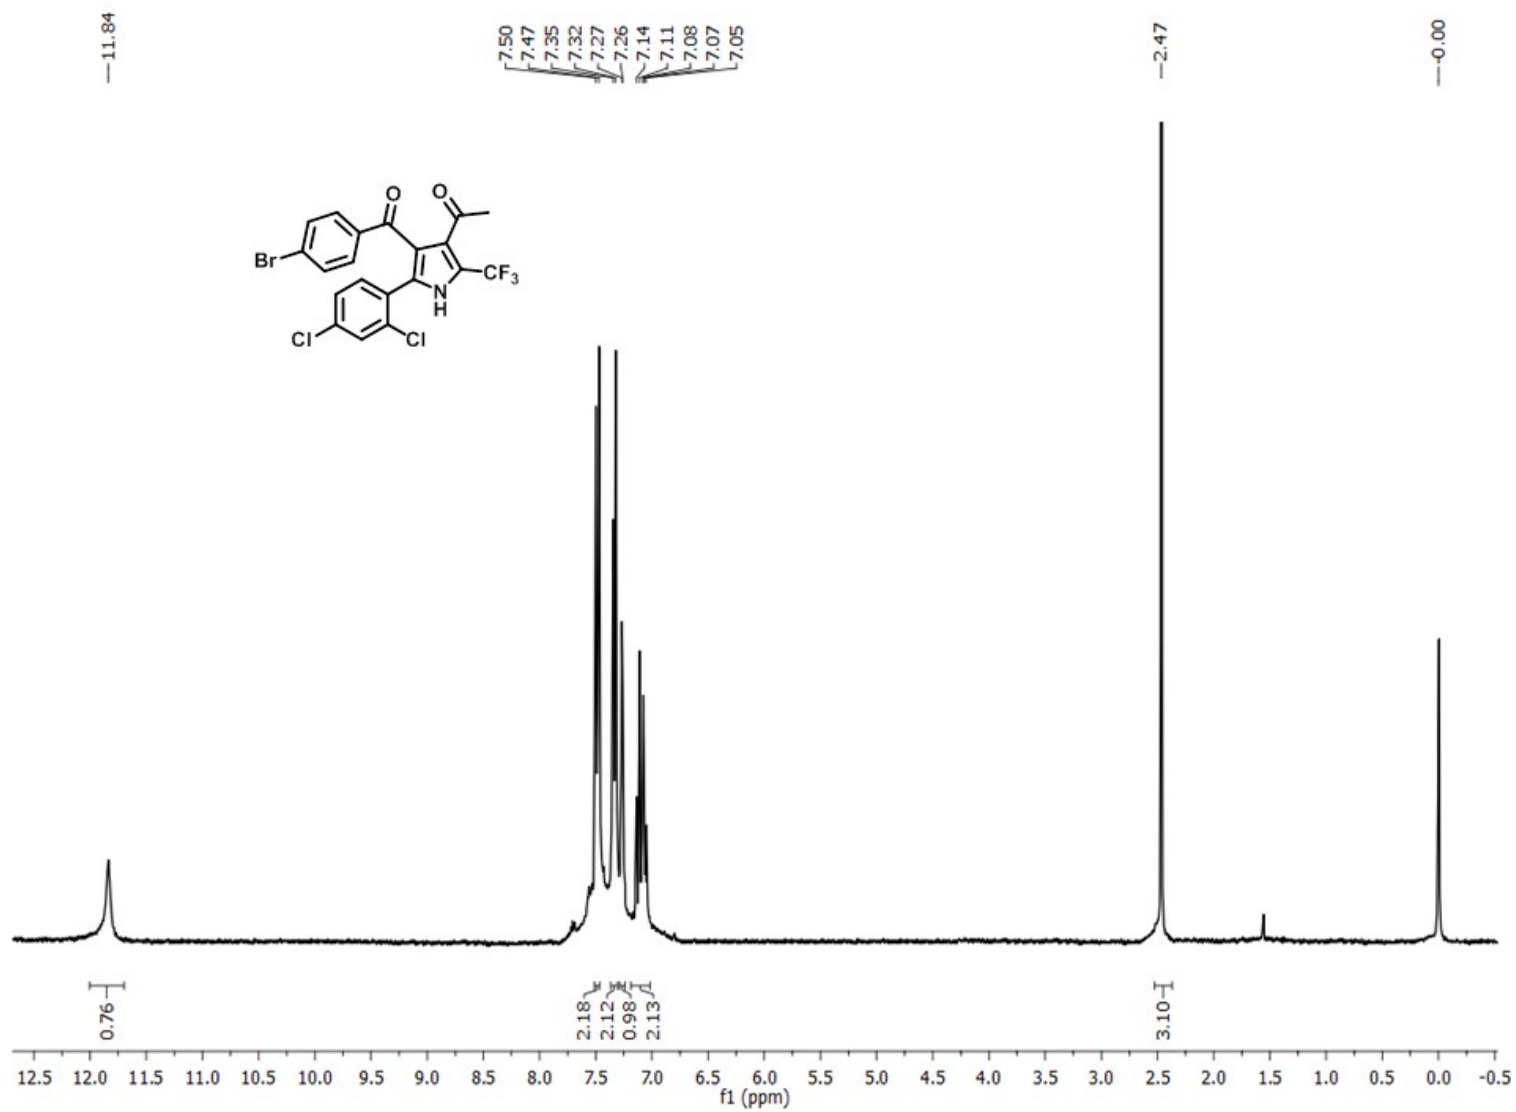

Figure 25.  $^1\text{H}$  NMR spectrum of compound **2m**



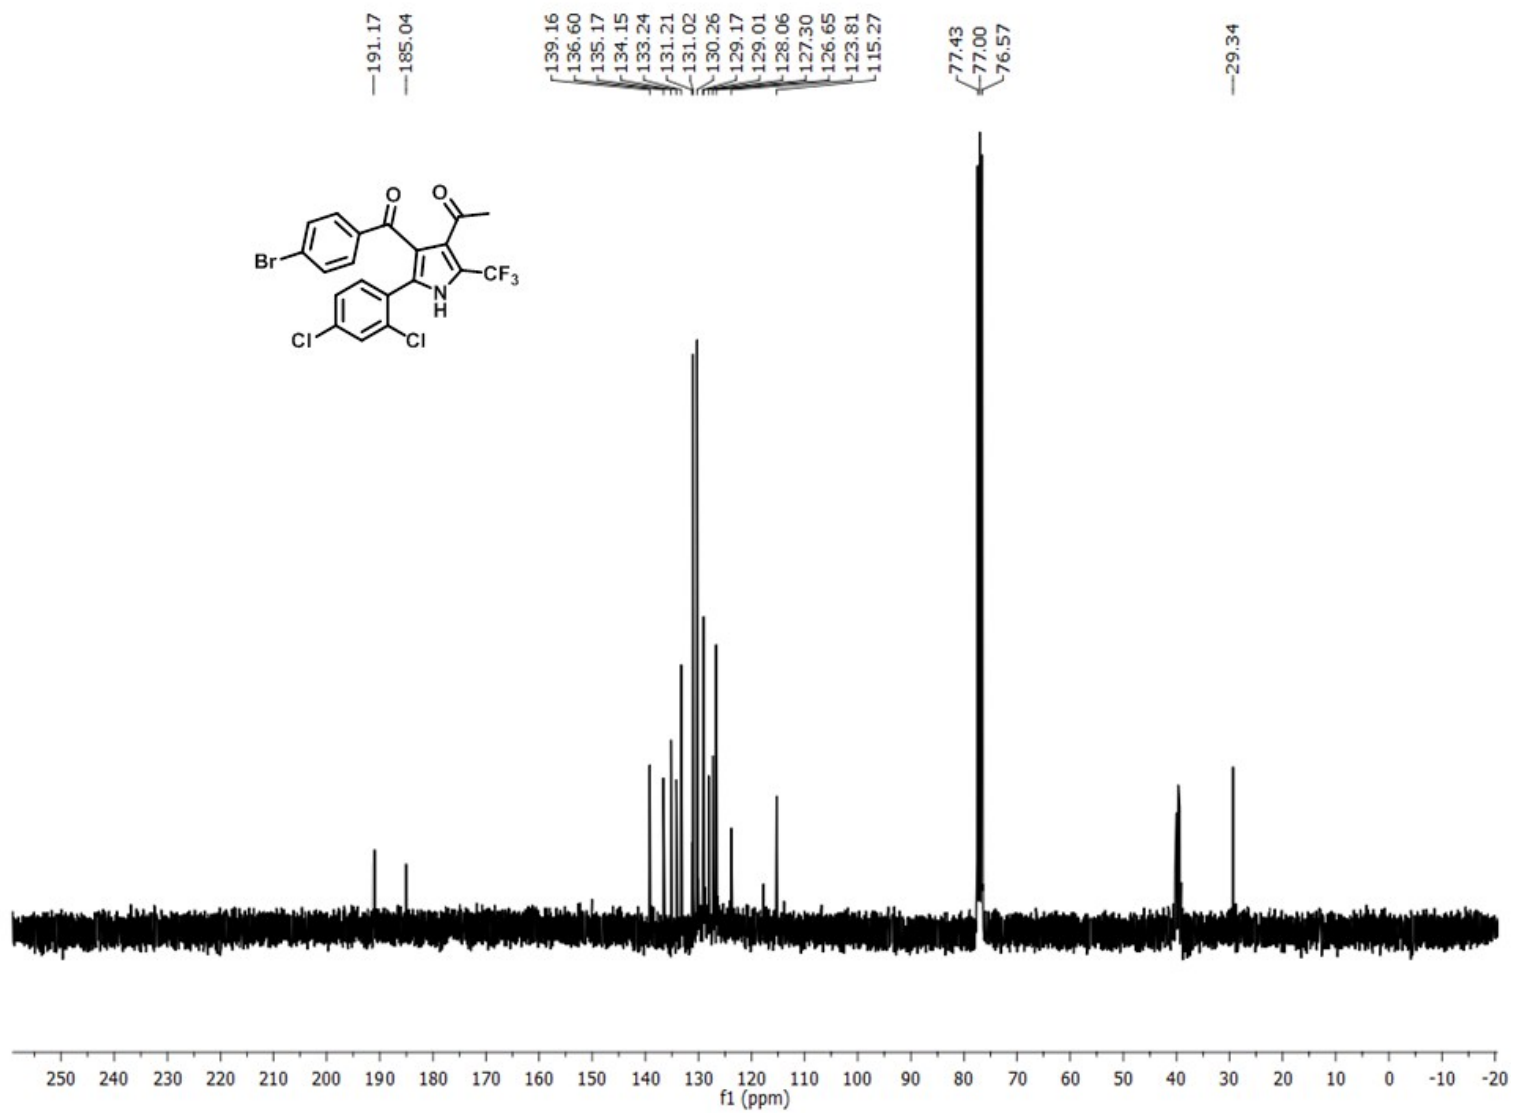

Figure 26.  $^{13}\text{C}$  NMR spectrum of compound **2m**

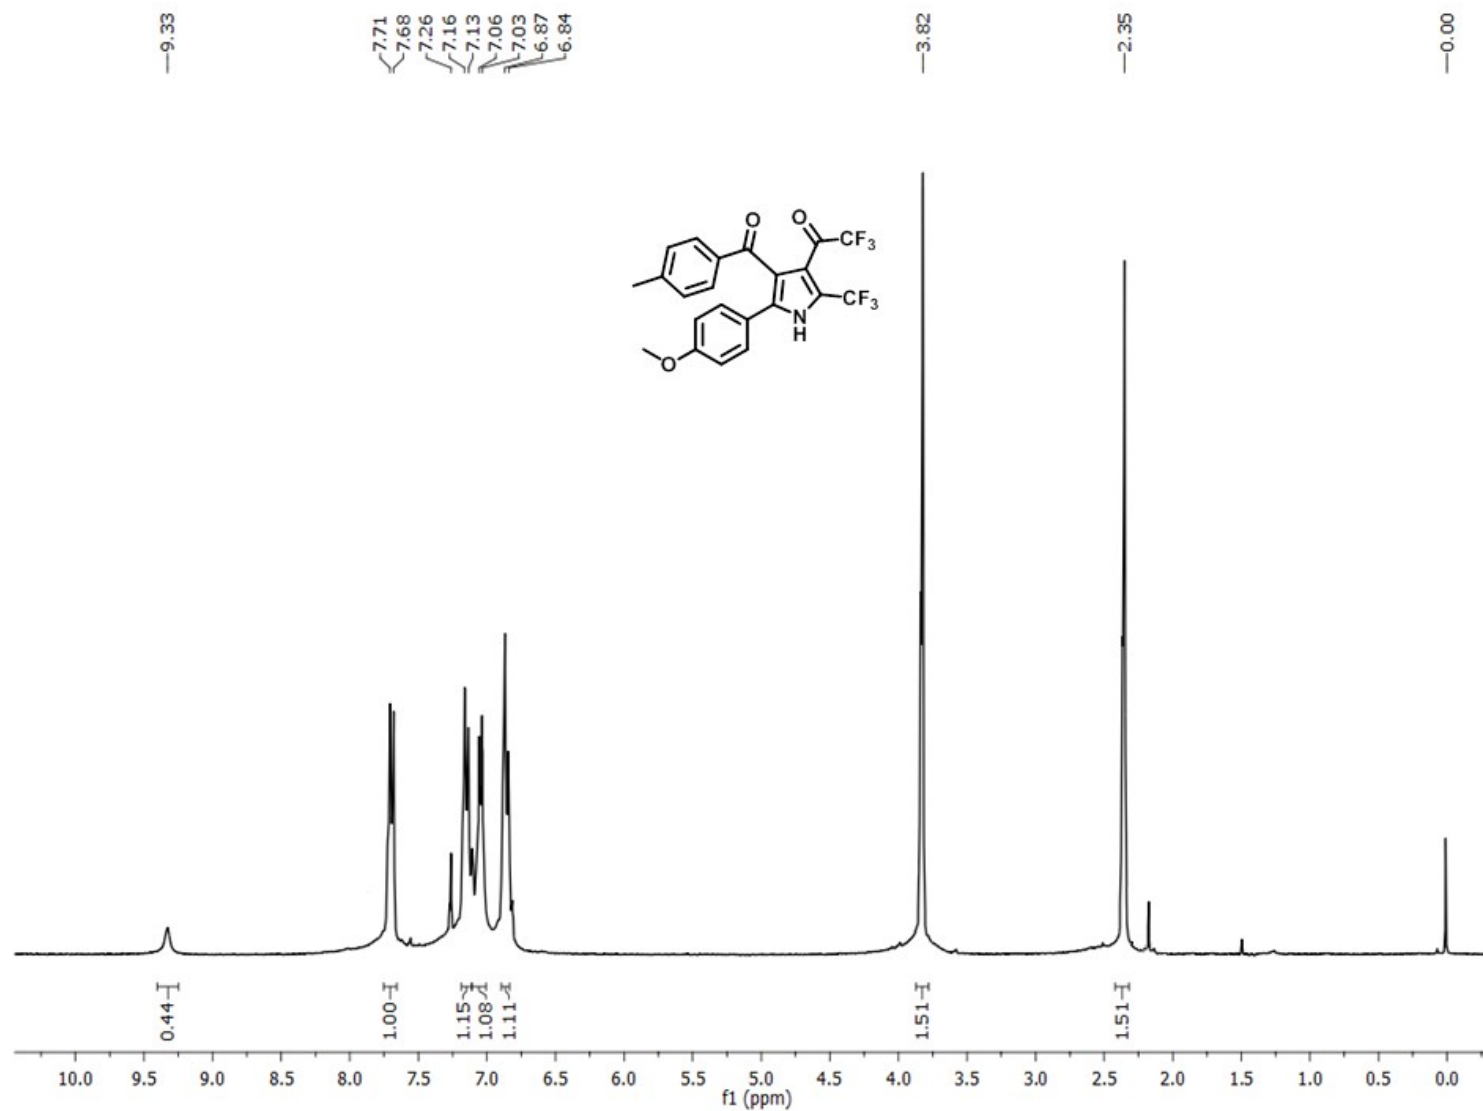

Figure 27.  $^1\text{H}$  NMR spectrum of compound **2n**

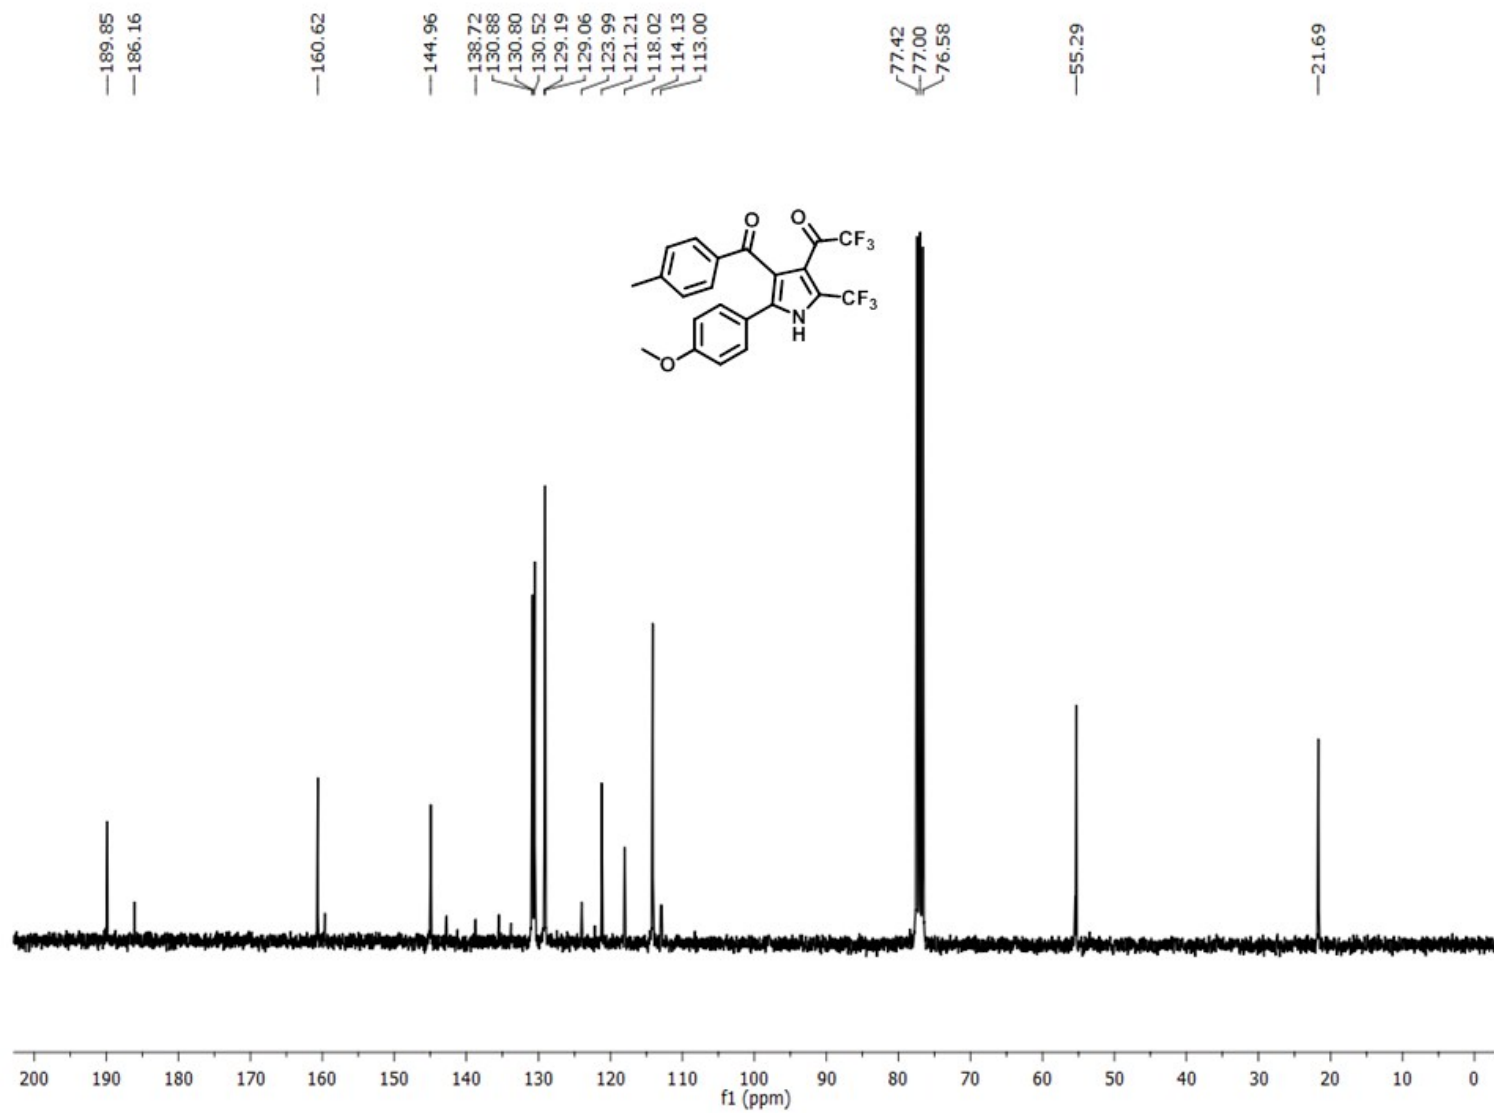

Figure 28. <sup>13</sup>C NMR spectrum of compound **2n**

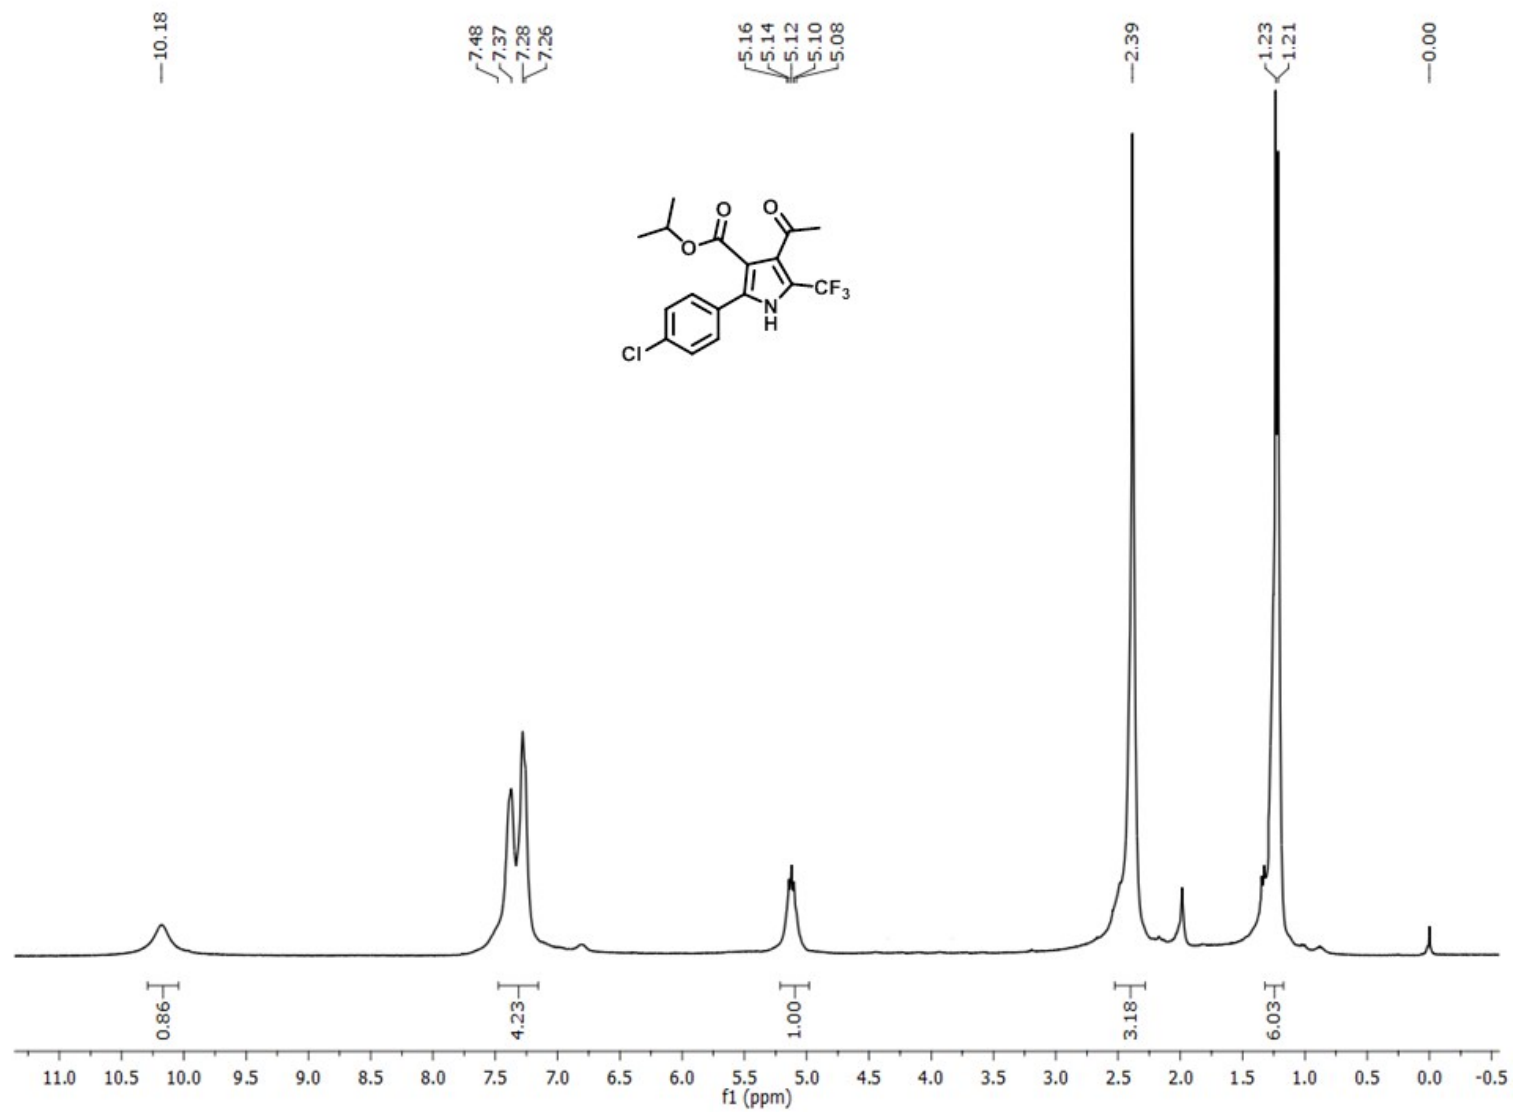

Figure 29. <sup>1</sup>H NMR spectrum of compound **2o**

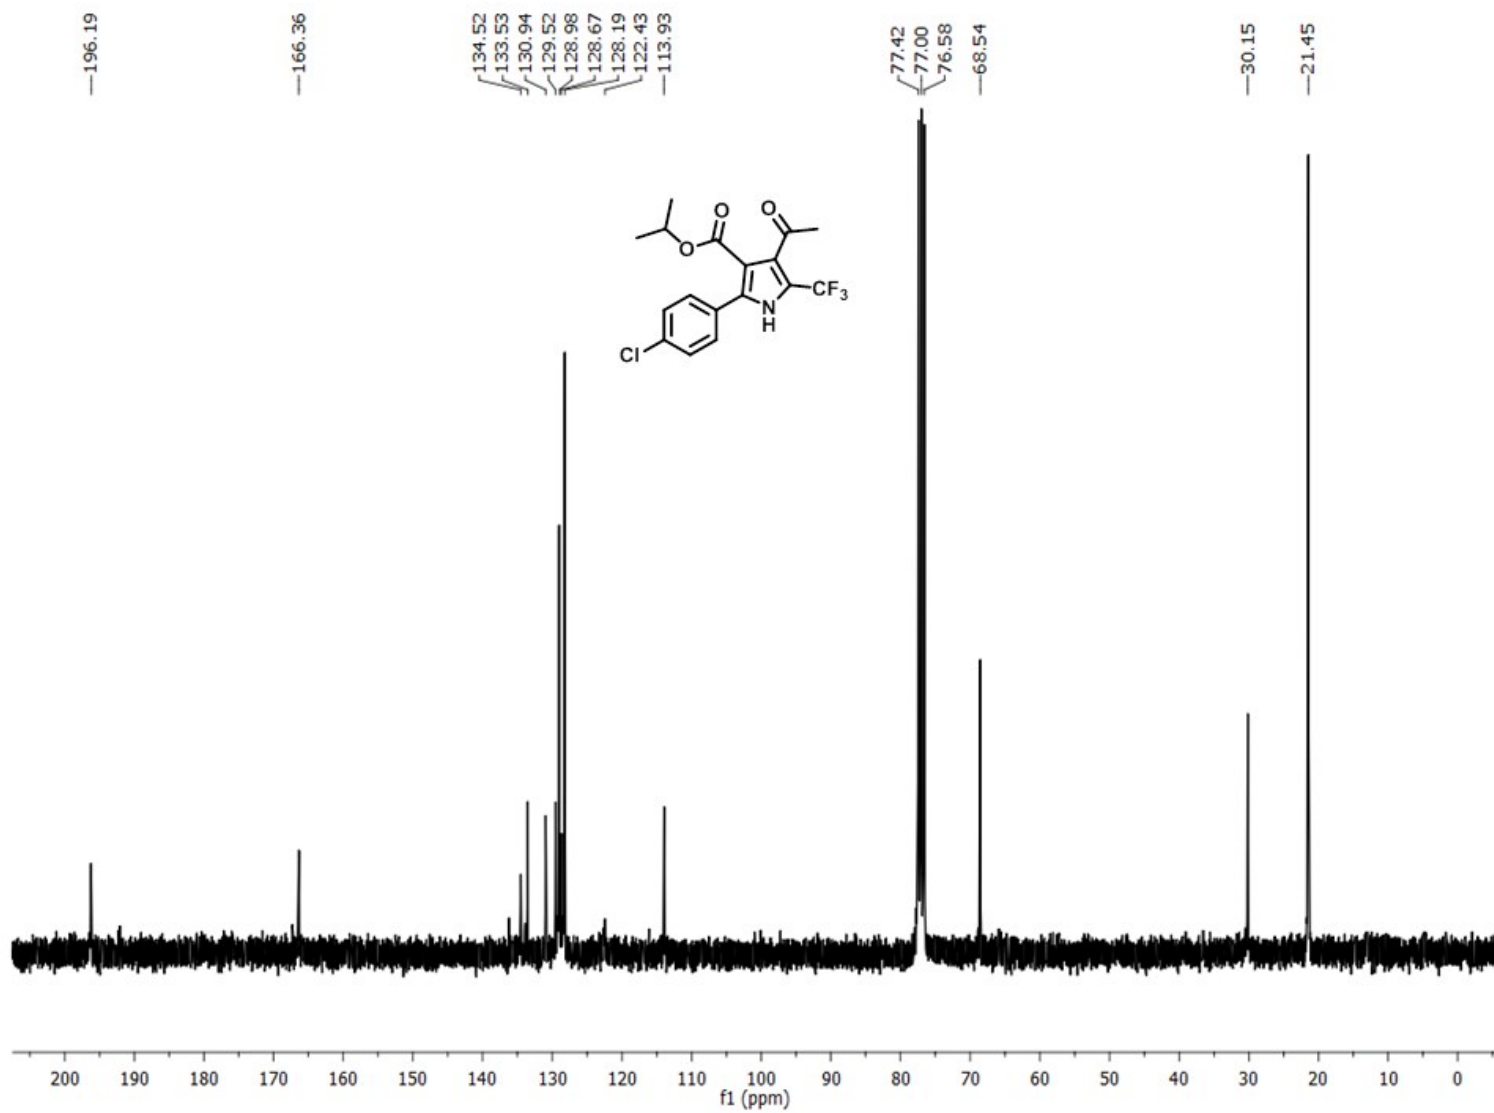

Figure 30. <sup>13</sup>C NMR spectrum of compound **2o**

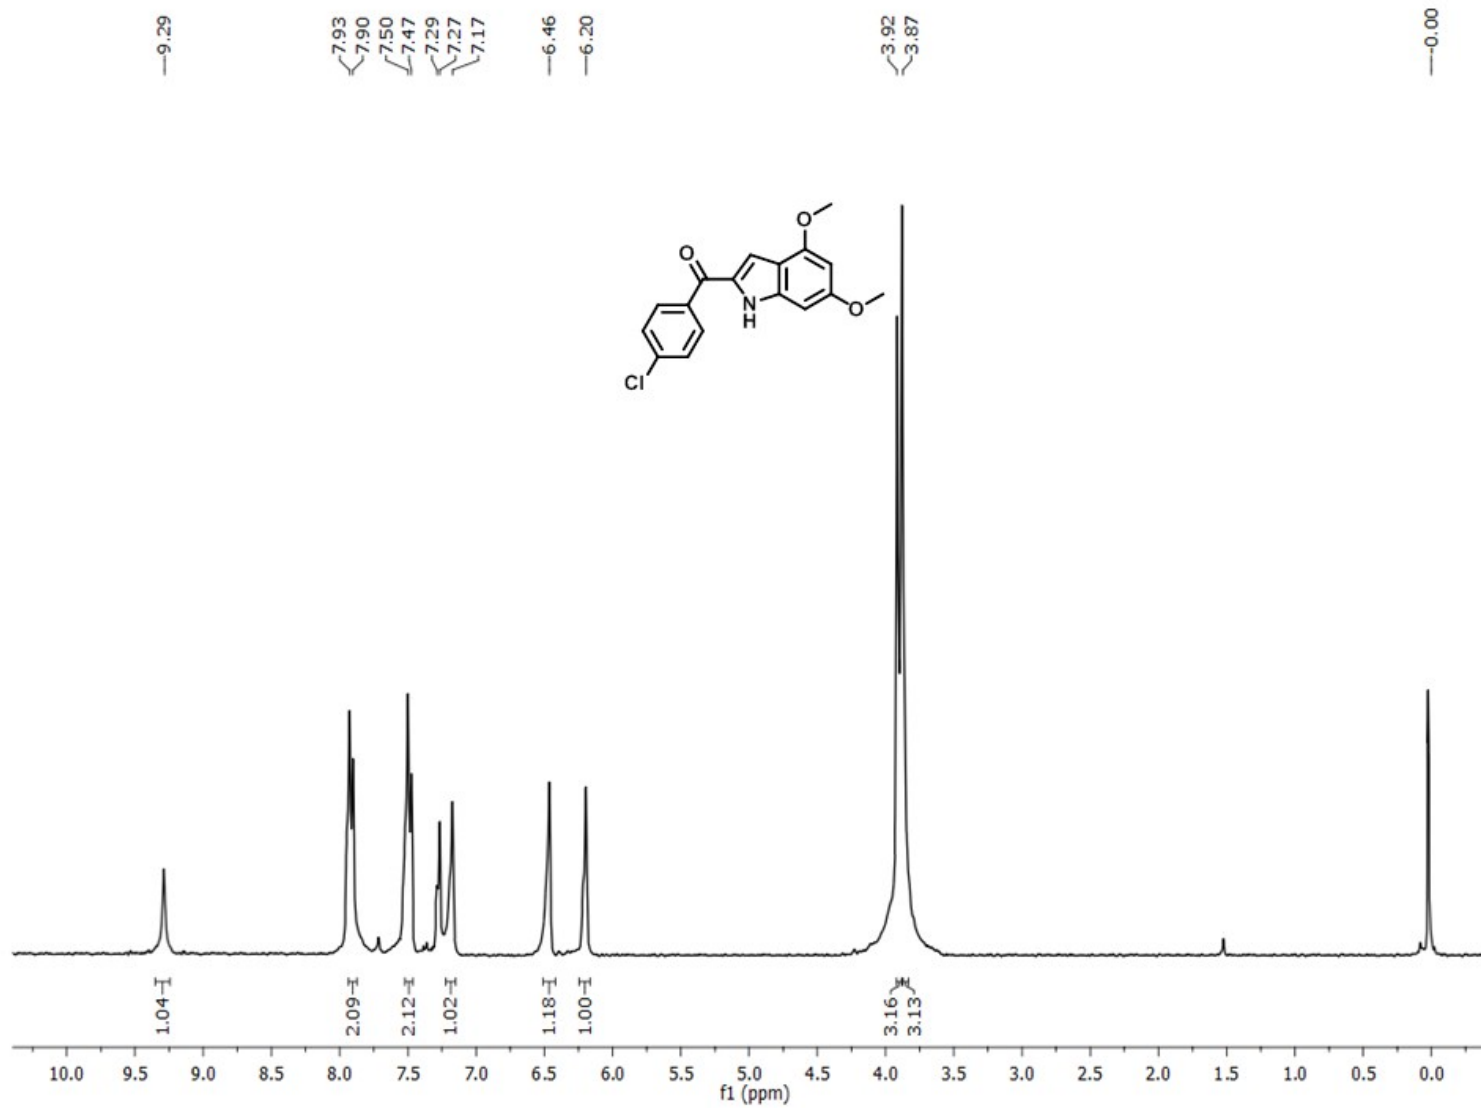

Figure 31. <sup>1</sup>H NMR spectrum of compound **3a**

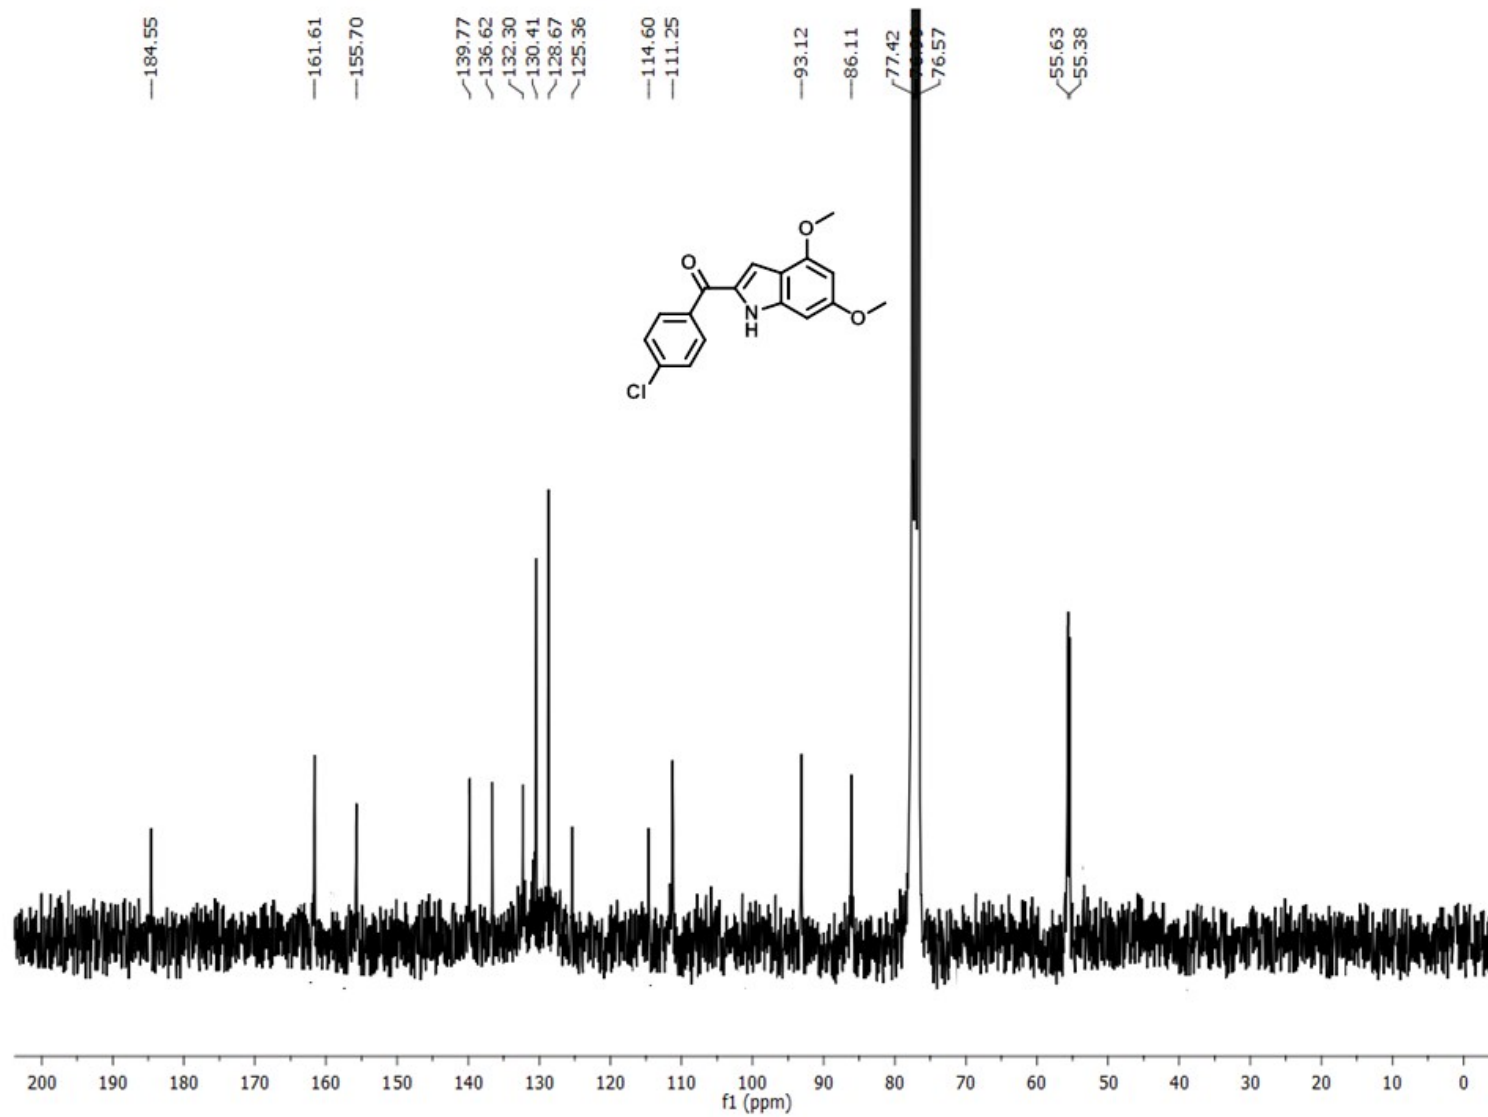

Figure 32. <sup>13</sup>C NMR spectrum of compound **3a**

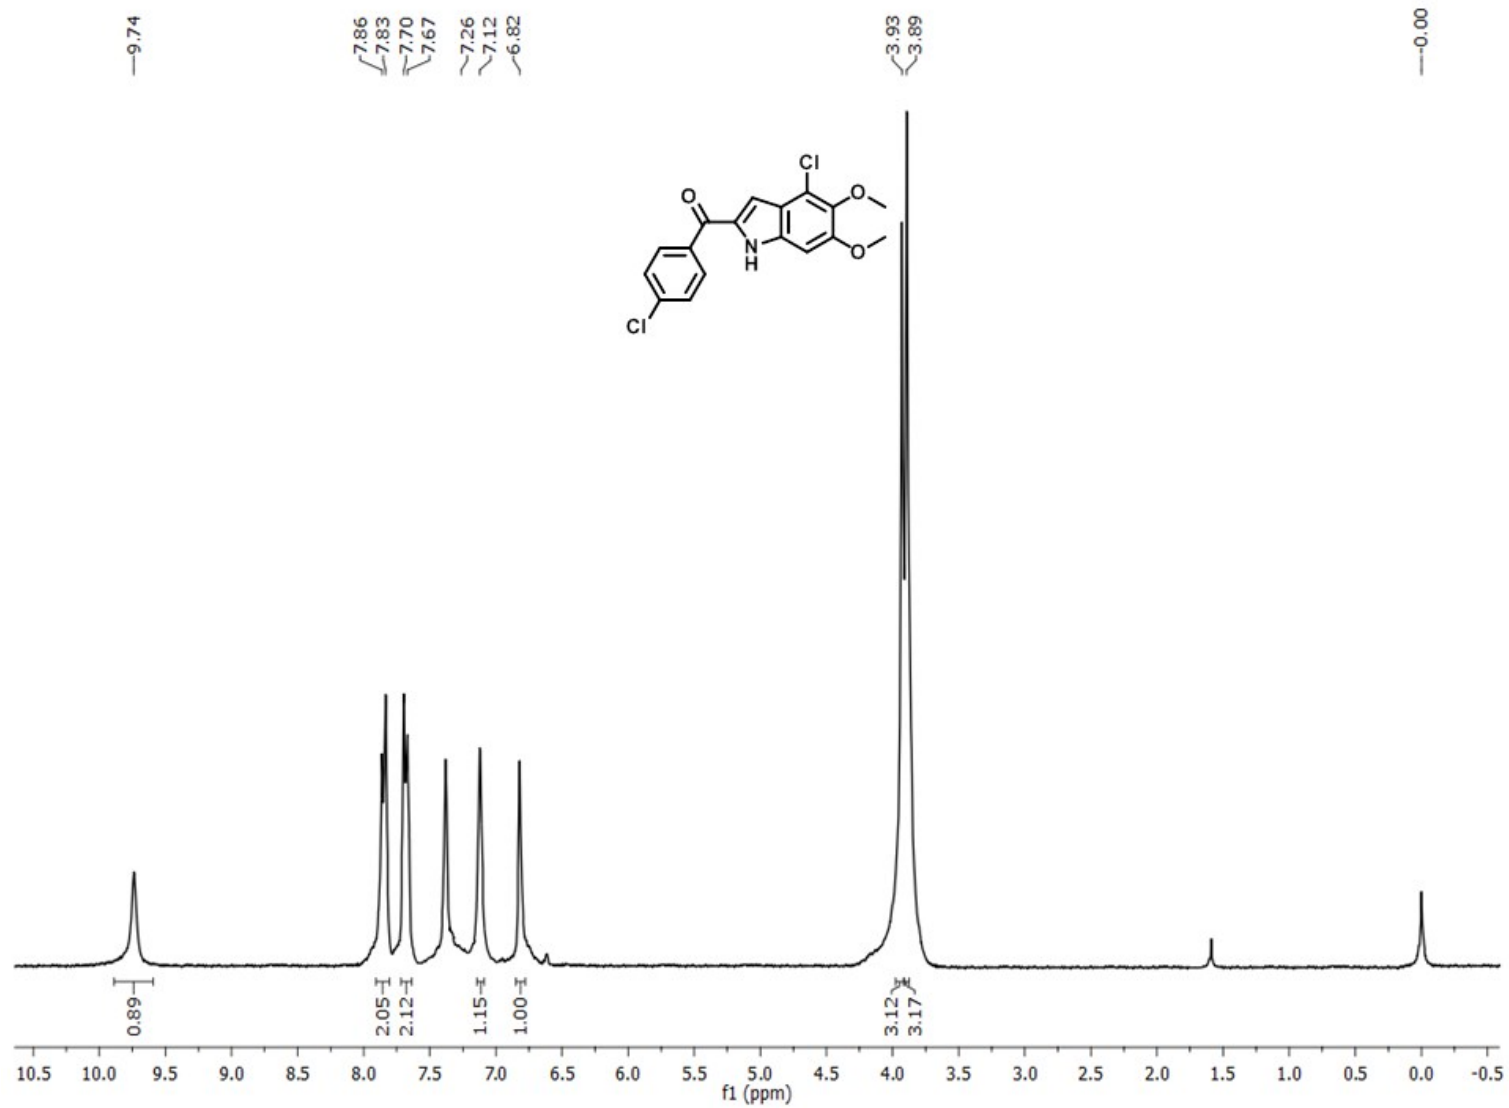

Figure 33. <sup>1</sup>H NMR spectrum of compound **3b**



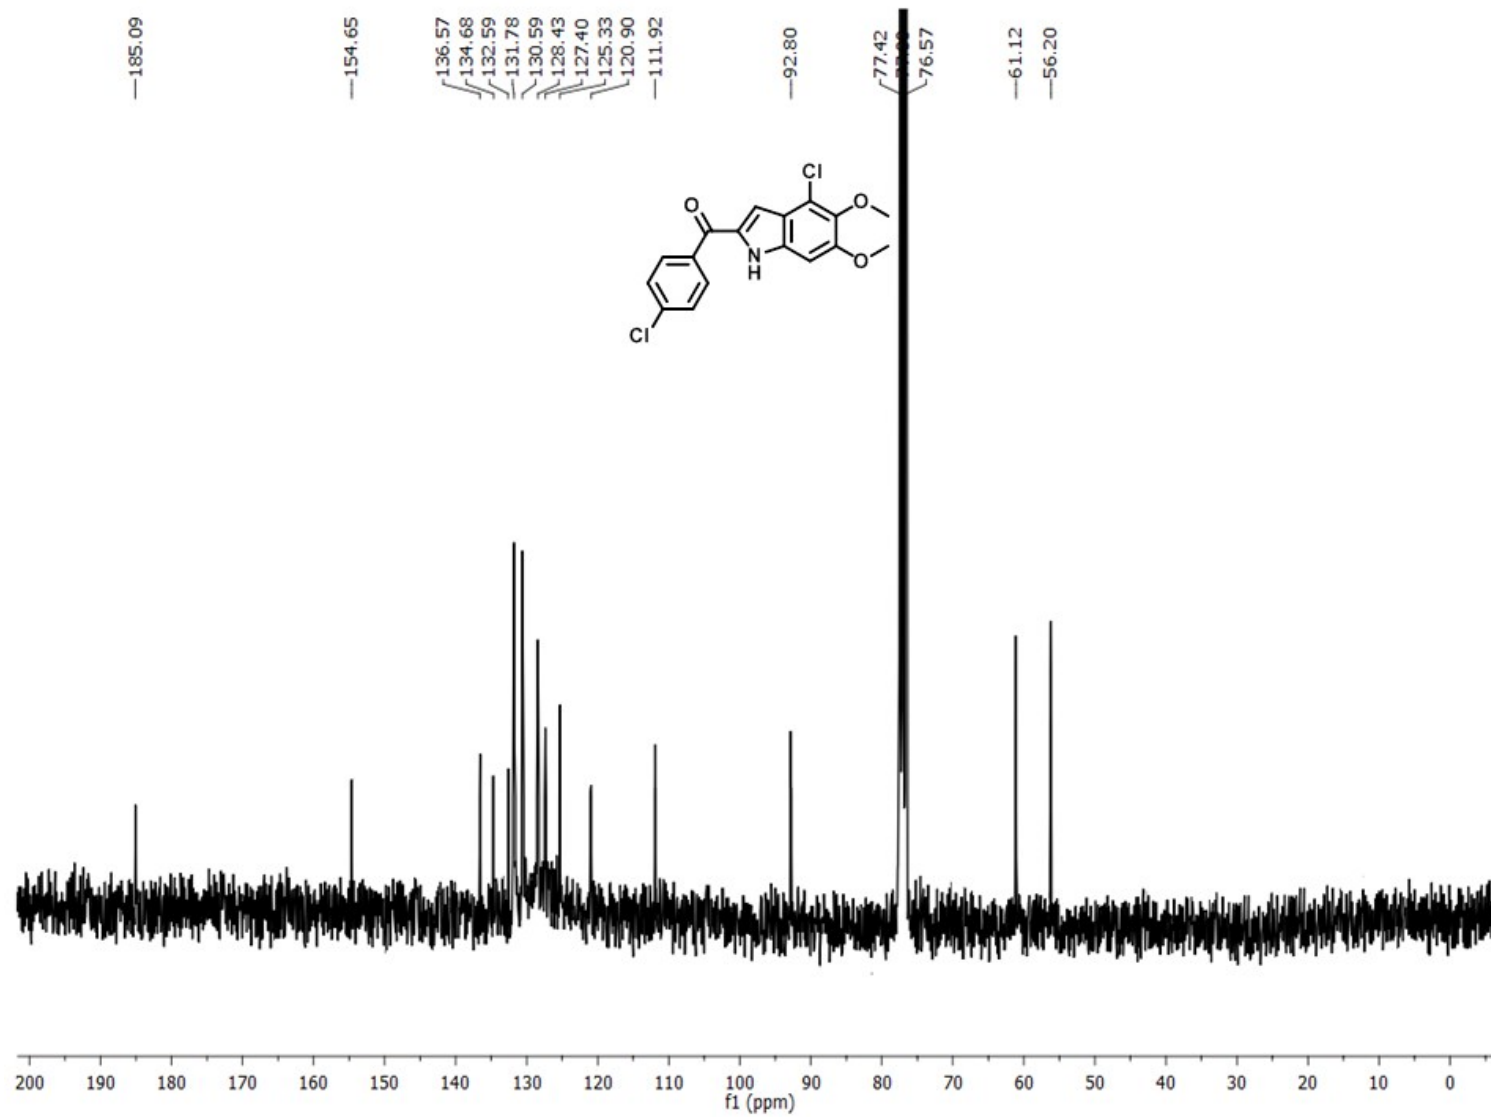

Figure 34. <sup>13</sup>C NMR spectrum of compound **3b**

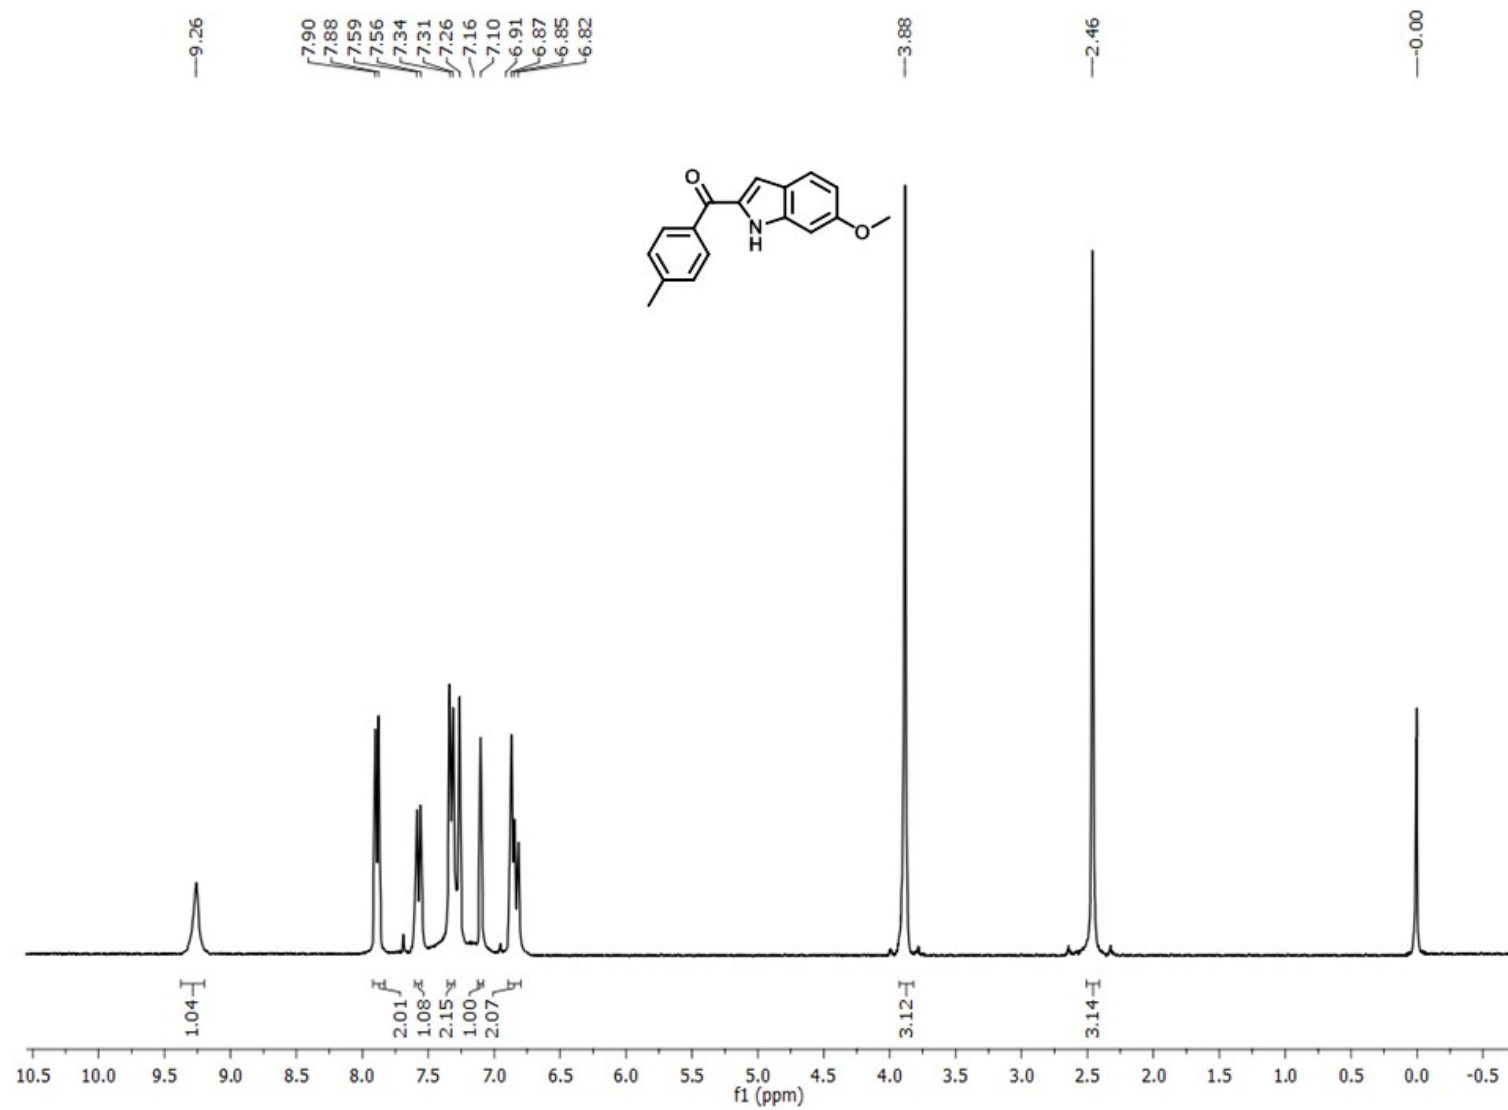

Figure 35. <sup>1</sup>H NMR spectrum of compound **3c**

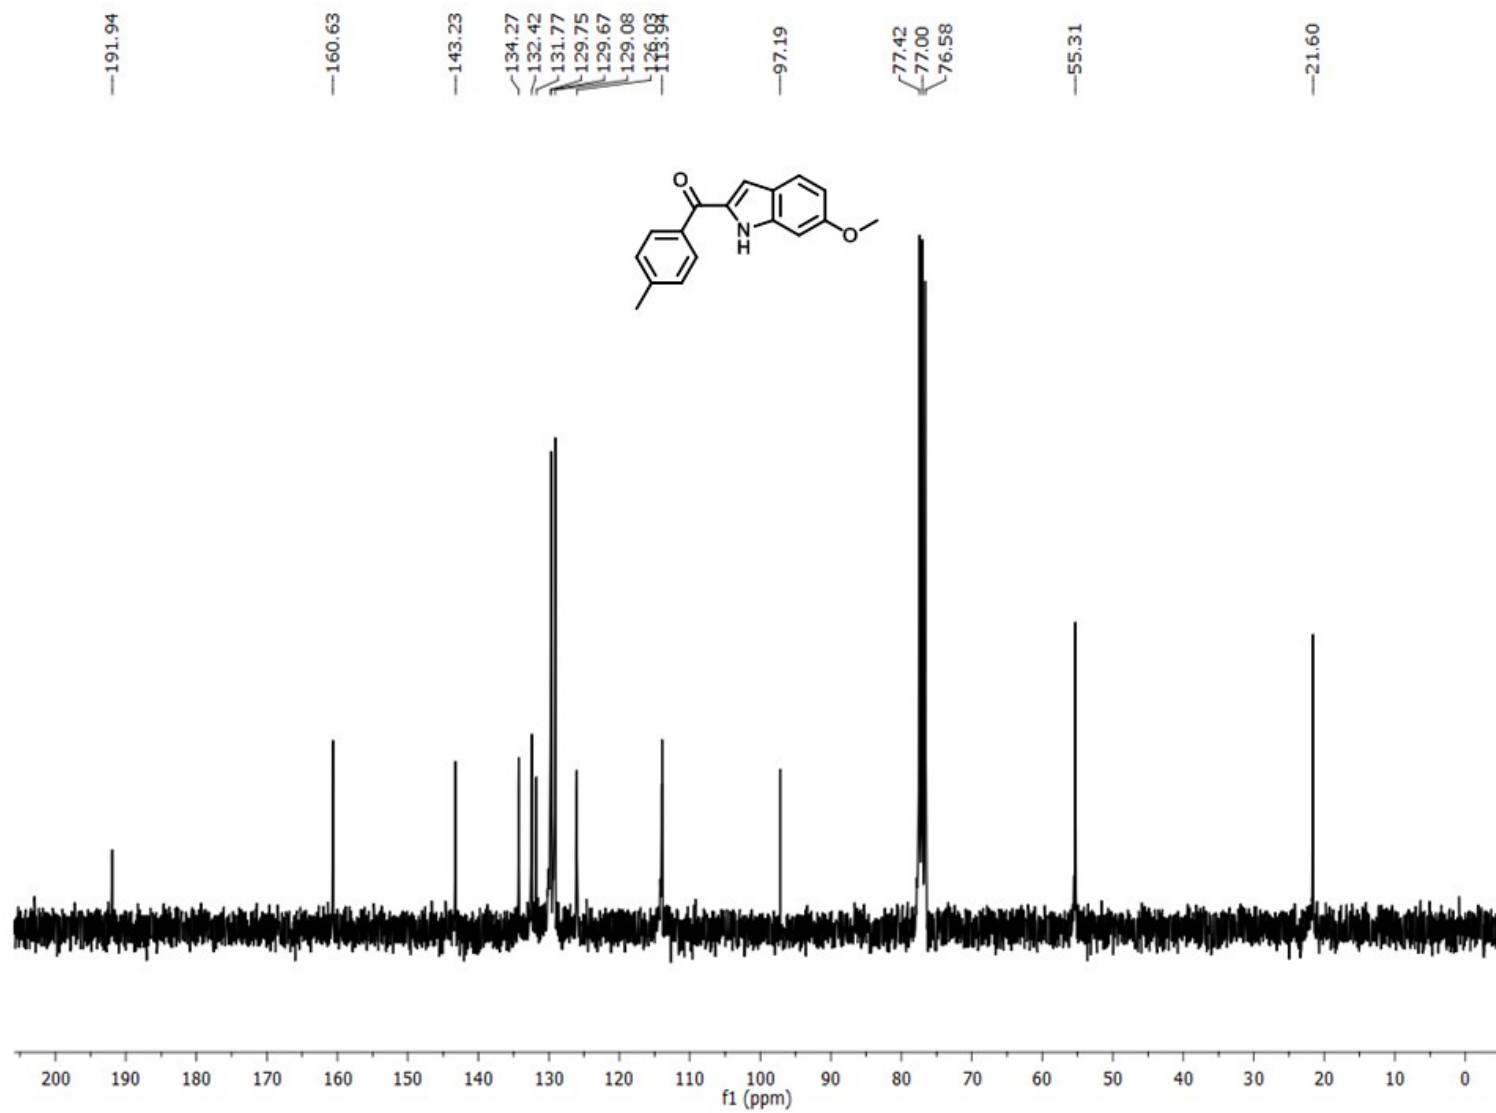

Figure 36. <sup>13</sup>C NMR spectrum of compound **3c**

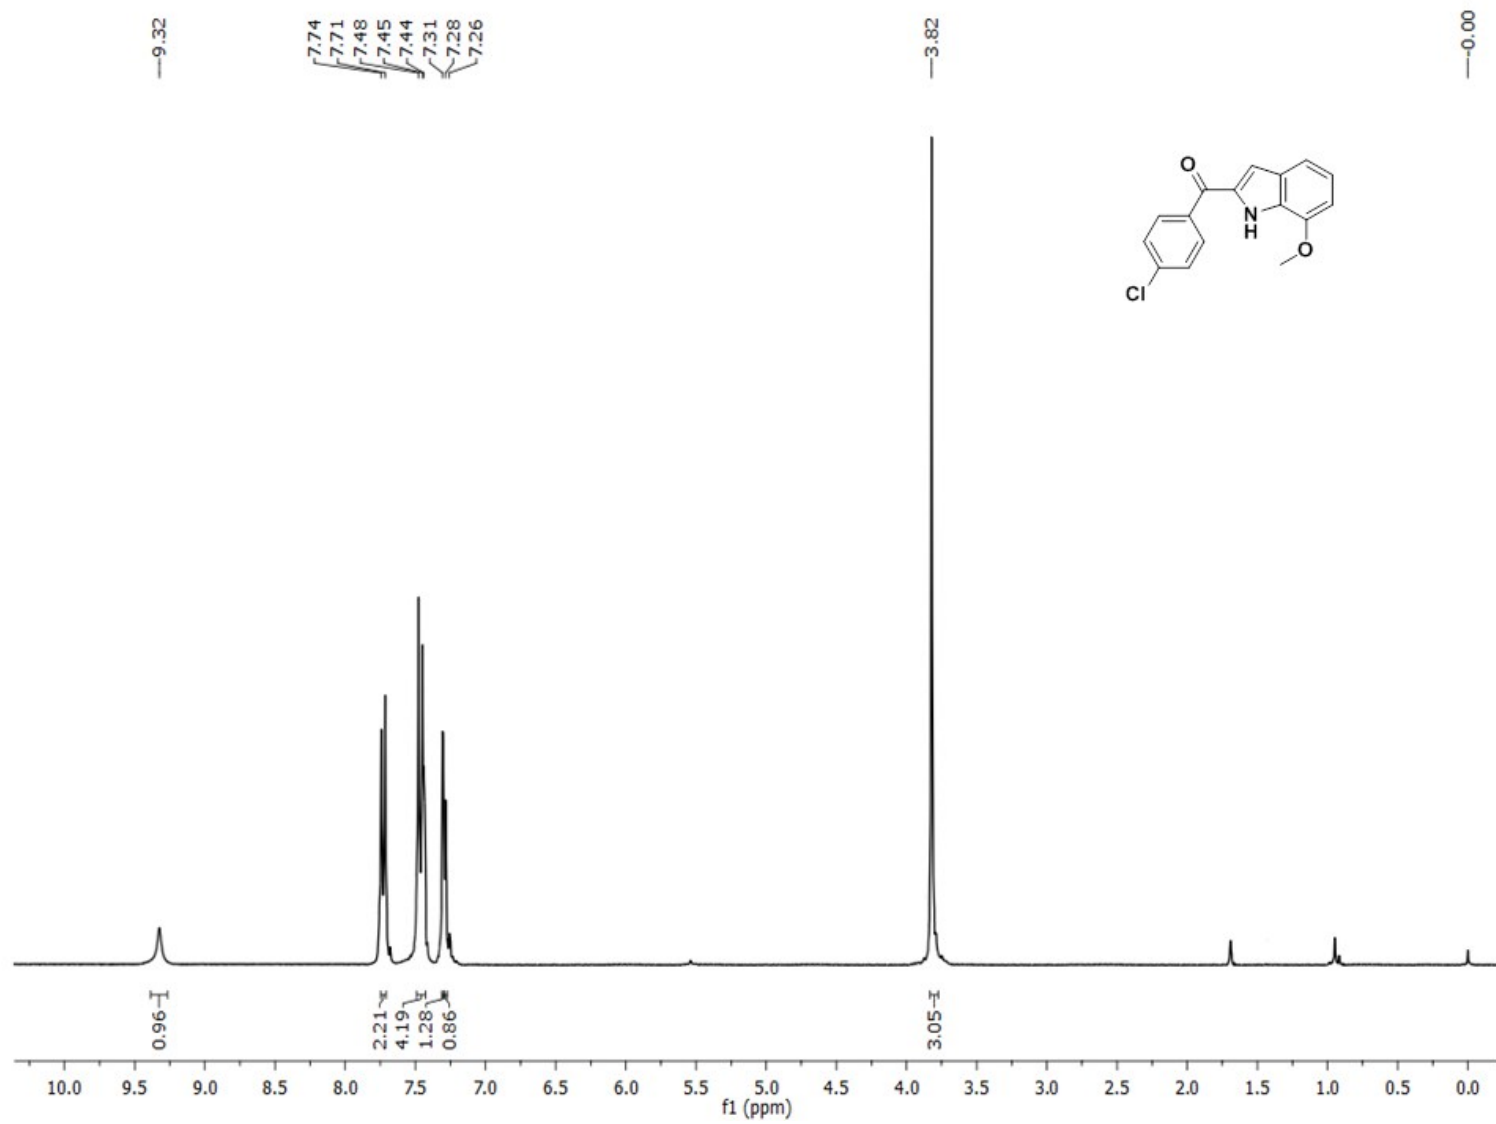

Figure 37. <sup>1</sup>H NMR spectrum of compound **3d**

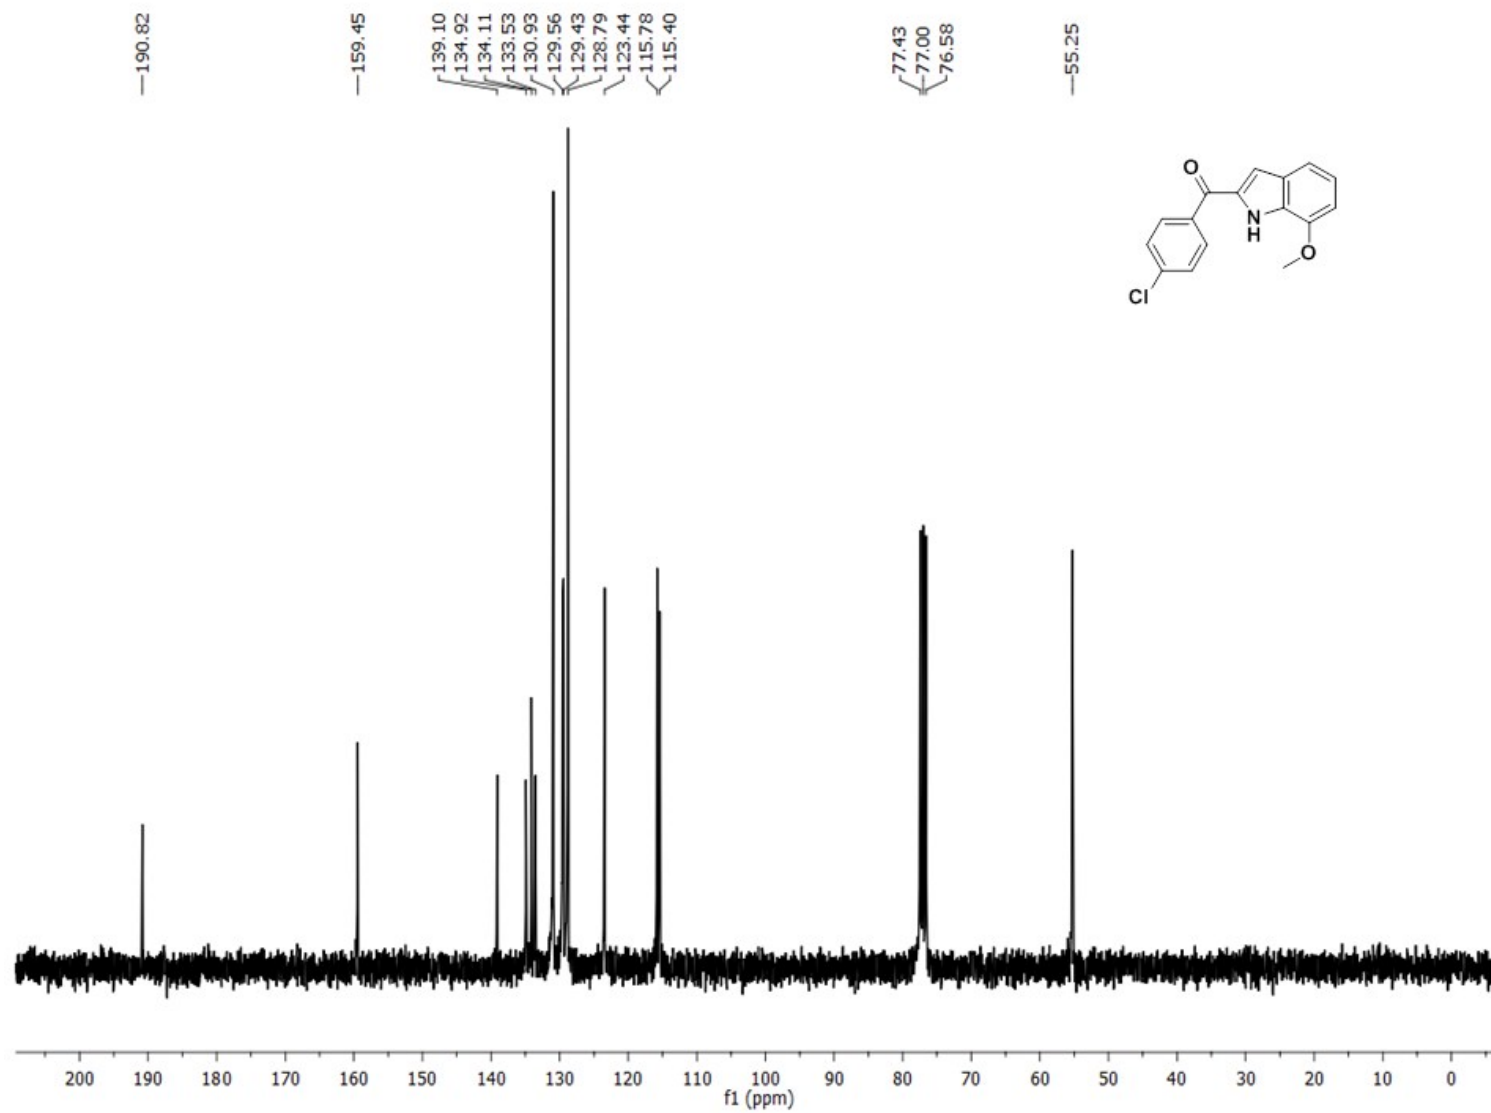

Figure 38. <sup>13</sup>C NMR spectrum of compound **3d**

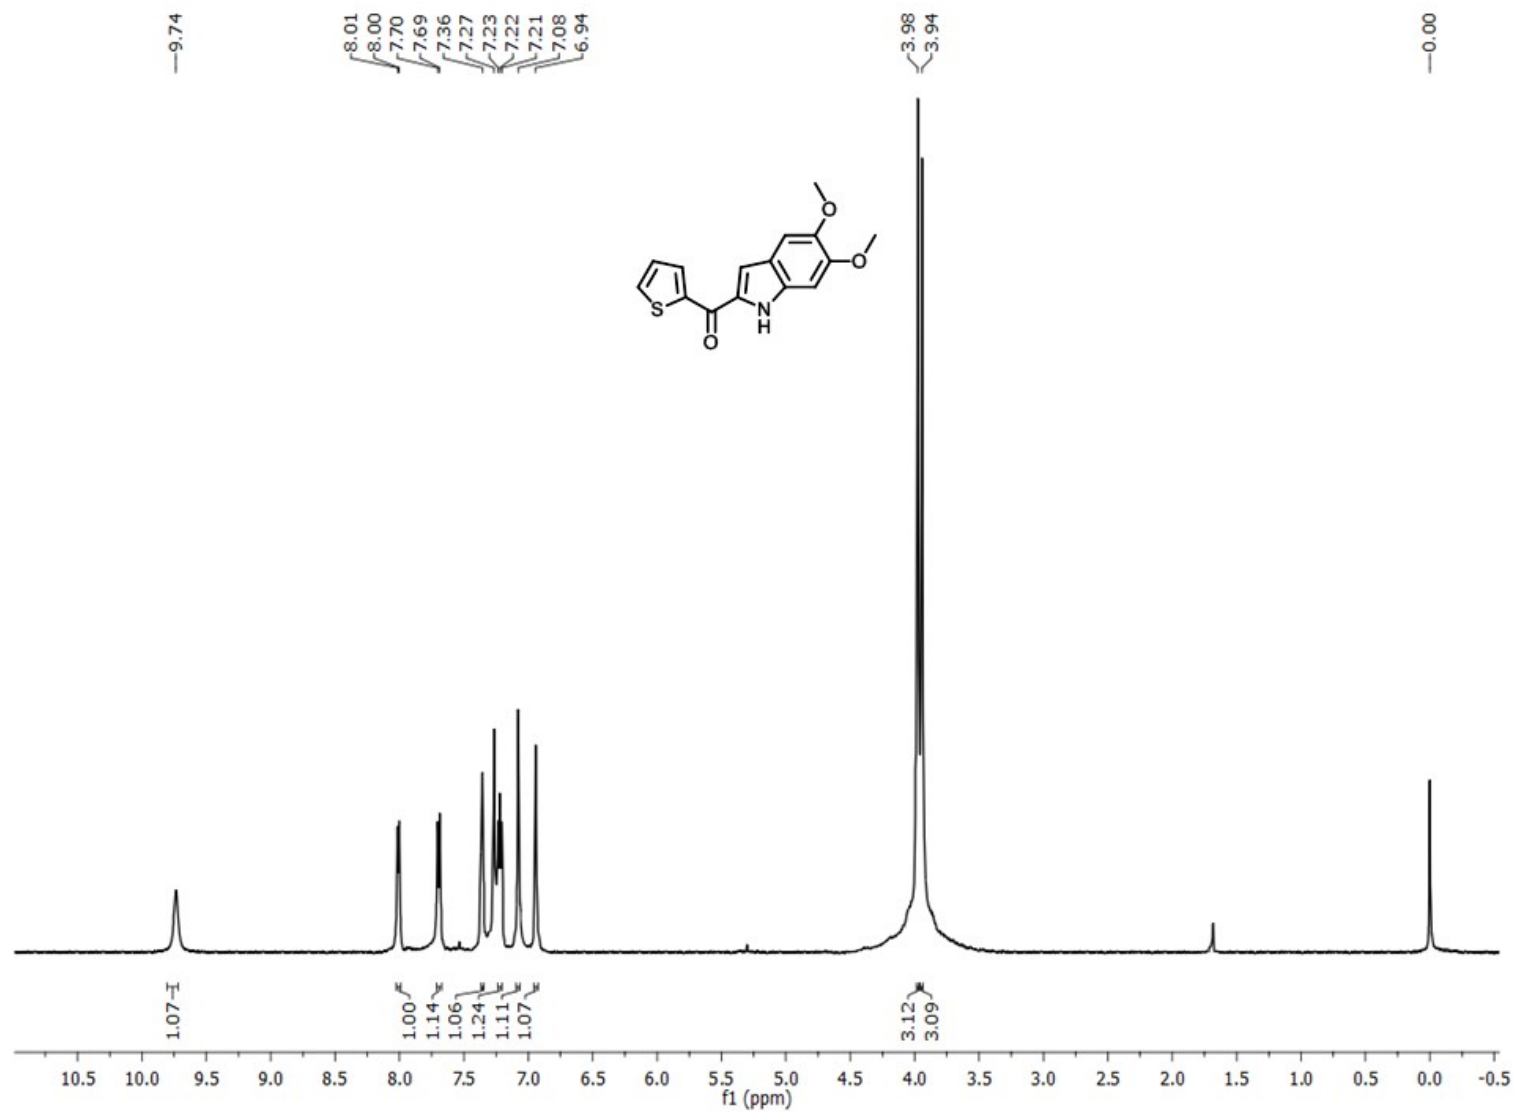

Figure 39. <sup>1</sup>H NMR spectrum of compound 3e

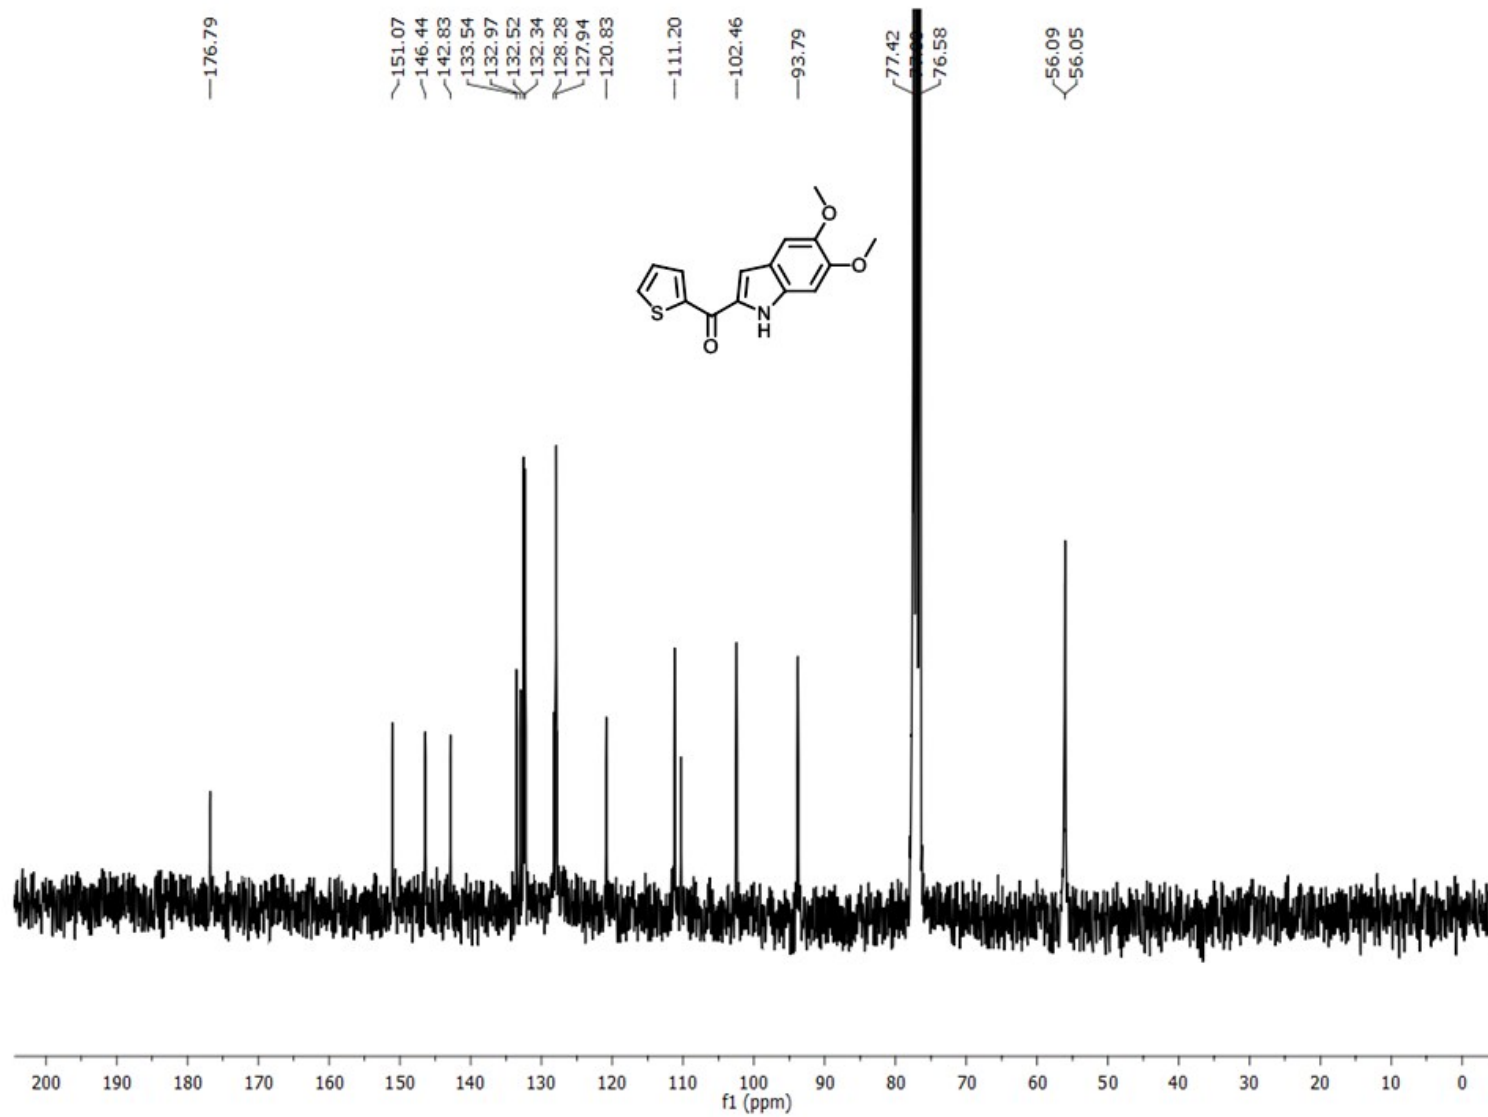

Figure 40. <sup>13</sup>C NMR spectrum of compound **3e**

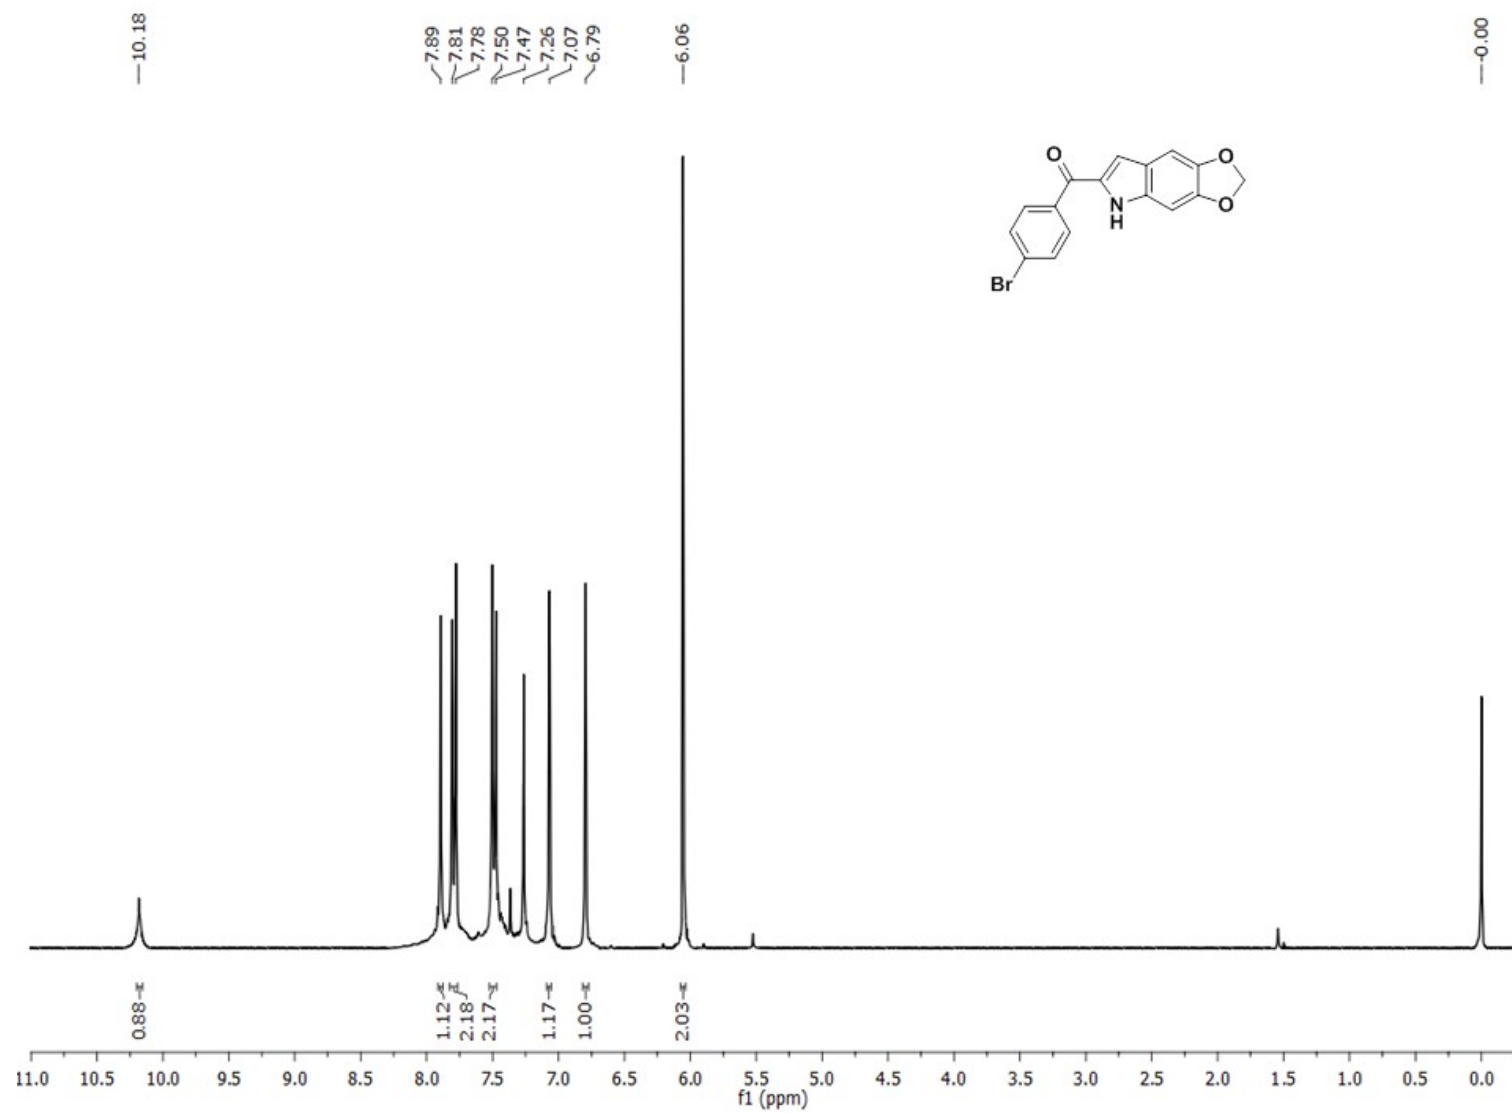

Figure 41.  $^1\text{H}$  NMR spectrum of compound **3f**



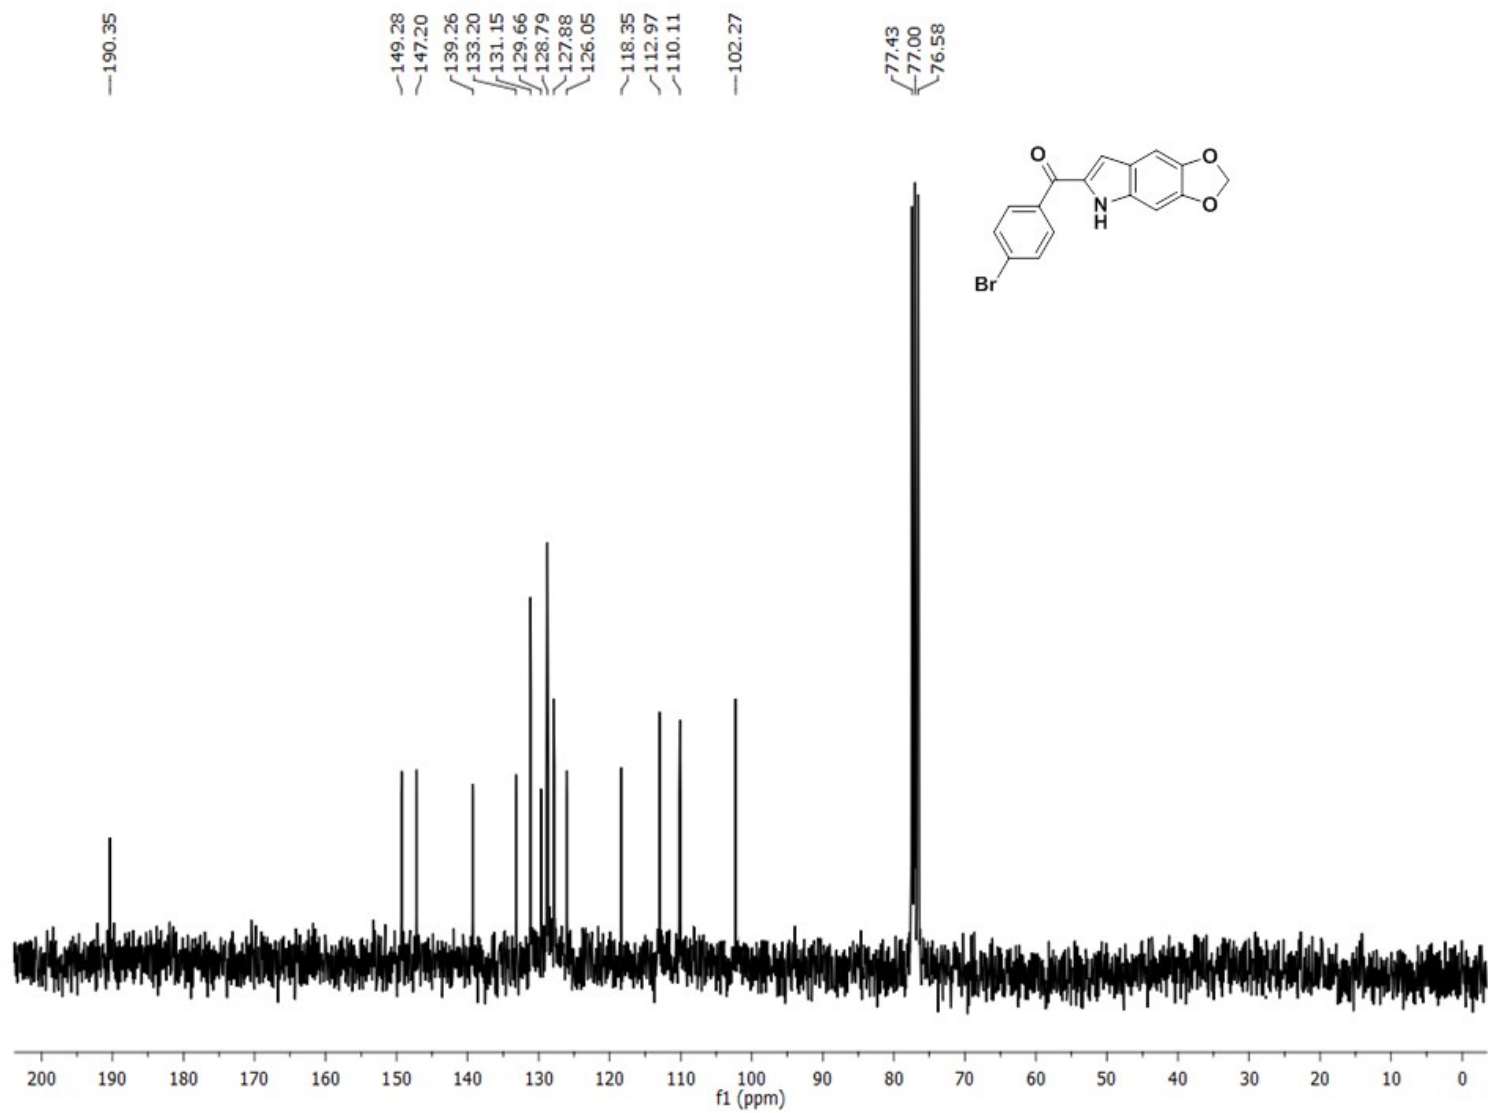

Figure 42. <sup>13</sup>C NMR spectrum of compound 3f

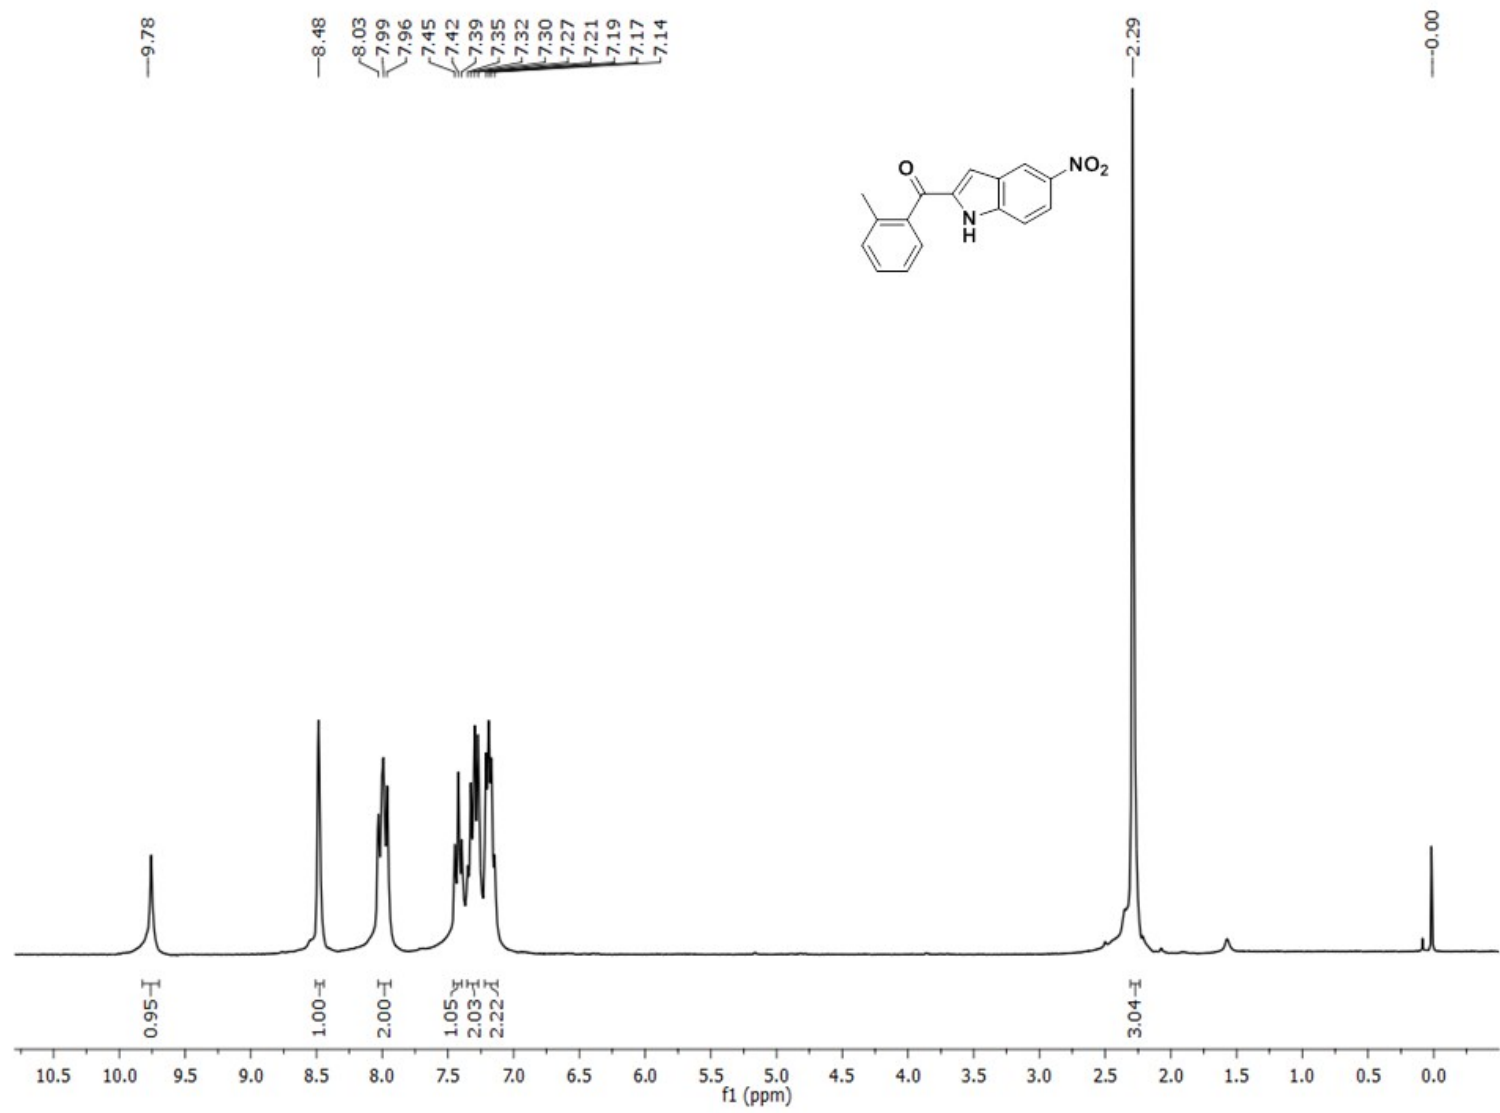

Figure 43. <sup>1</sup>H NMR spectrum of compound **3g**

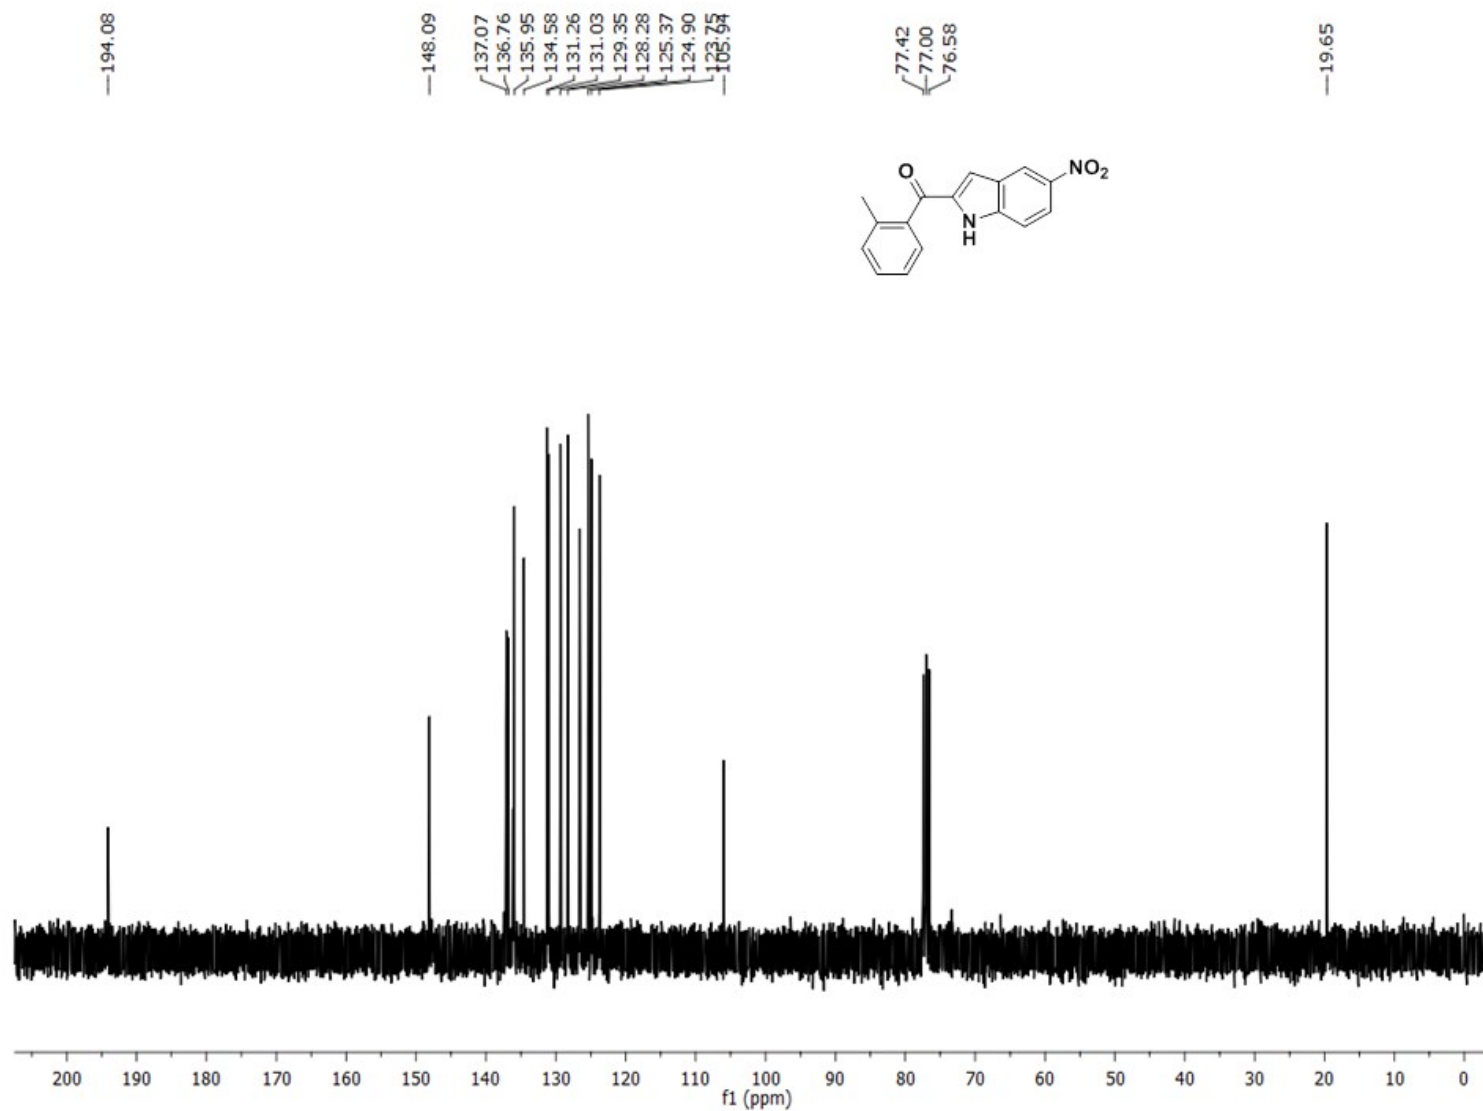

Figure 44.  $^{13}\text{C}$  NMR spectrum of compound **3g**

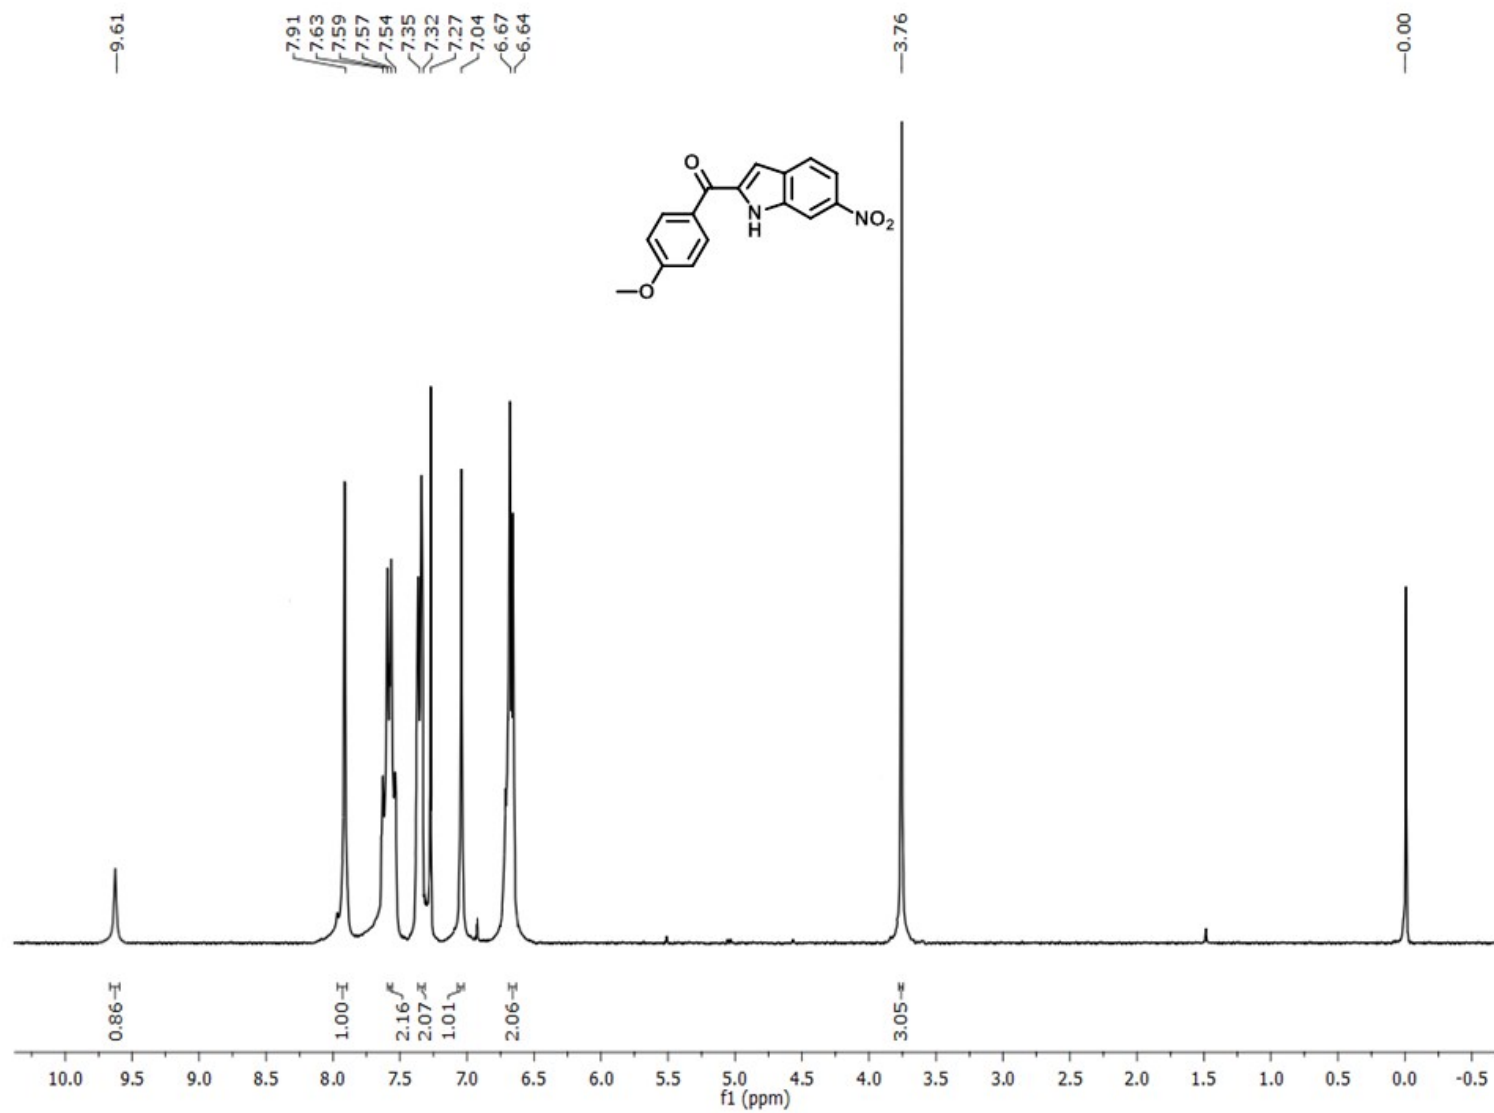

Figure 45.  $^1\text{H}$  NMR spectrum of compound **3h**

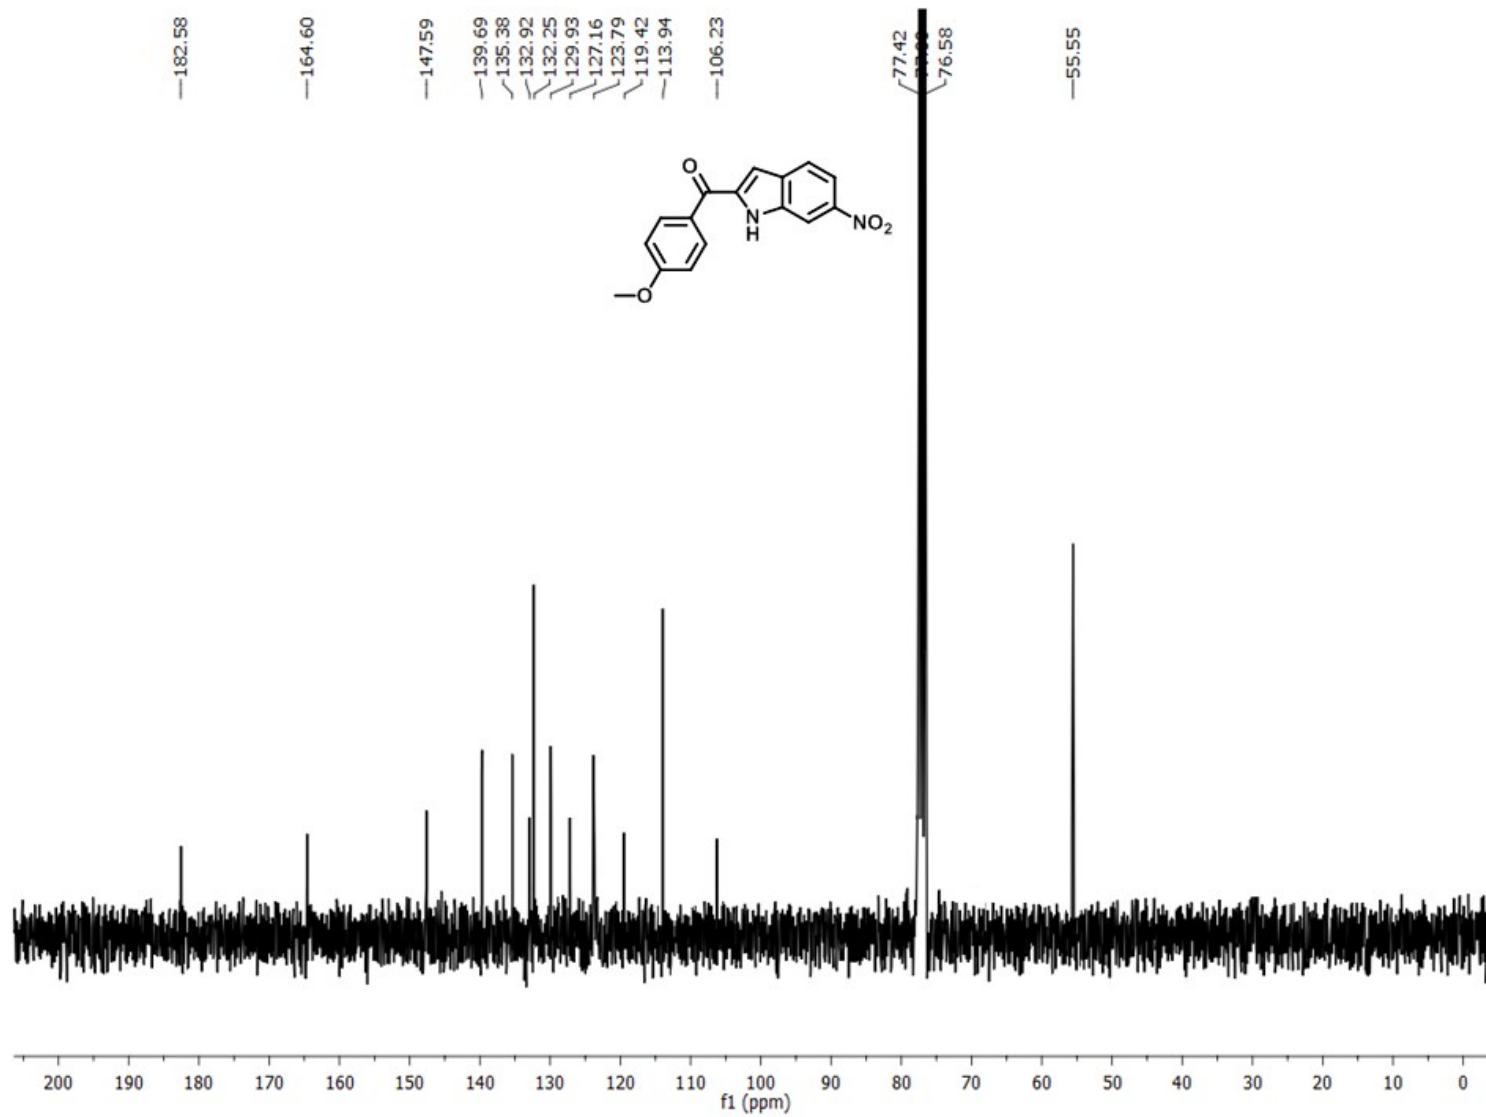

Figure 46. <sup>13</sup>C NMR spectrum of compound **3h**

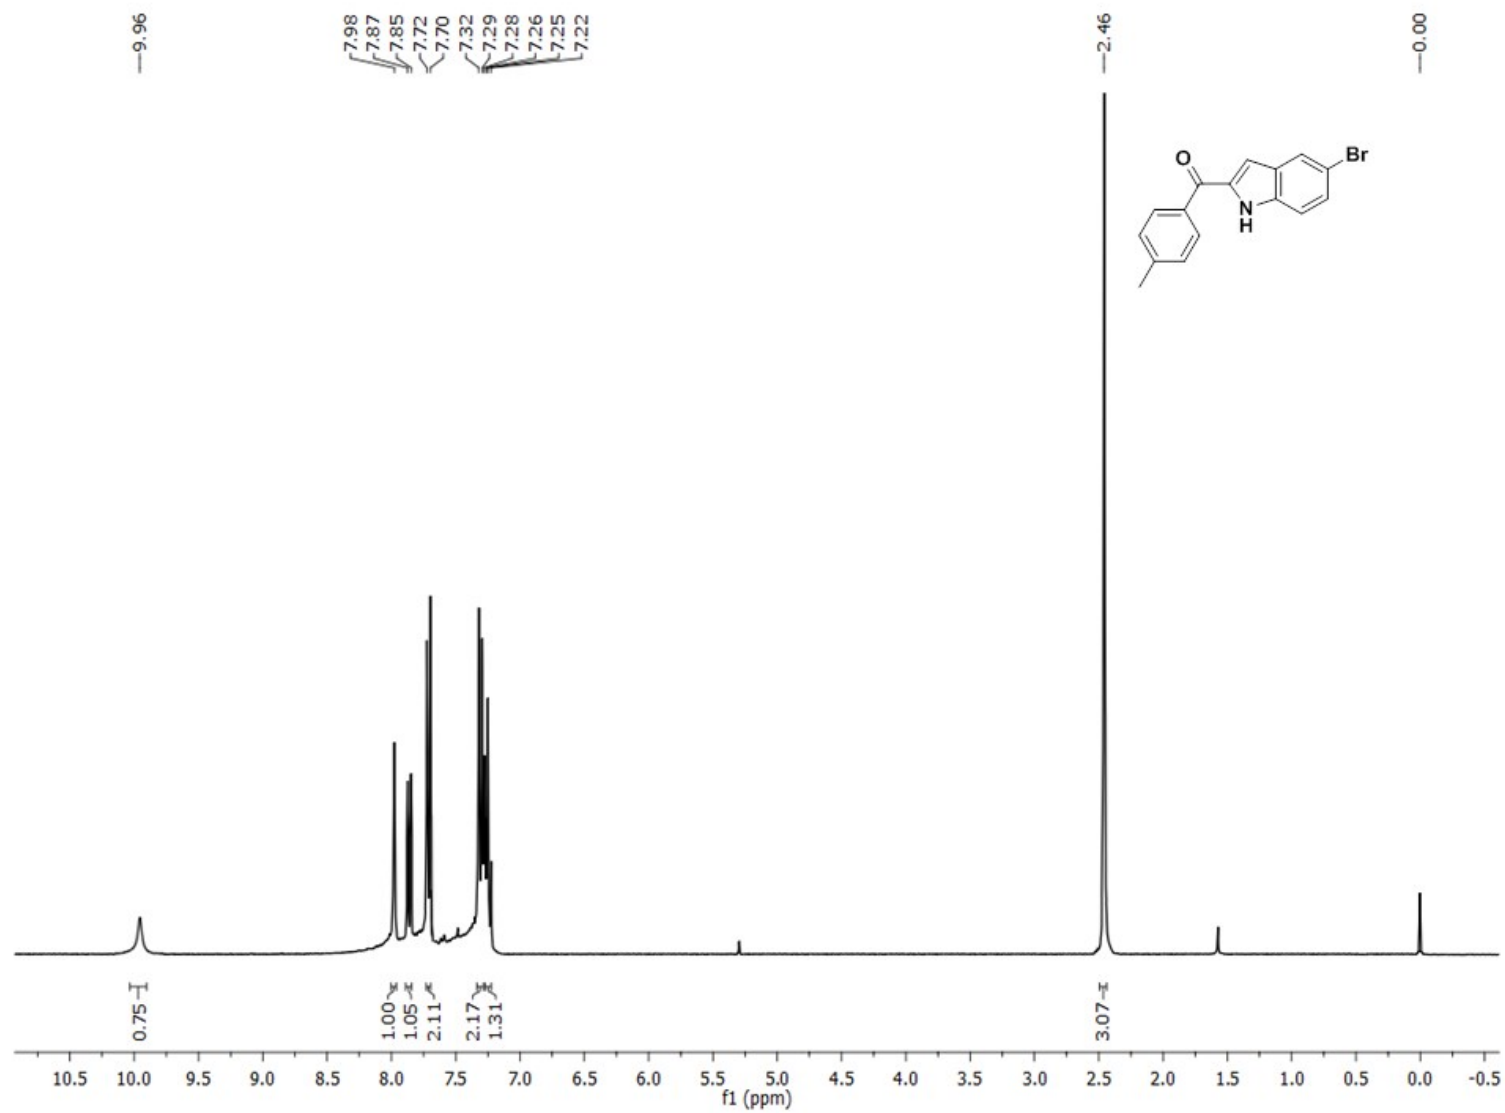

Figure 47.  $^1\text{H}$  NMR spectrum of compound **3i**

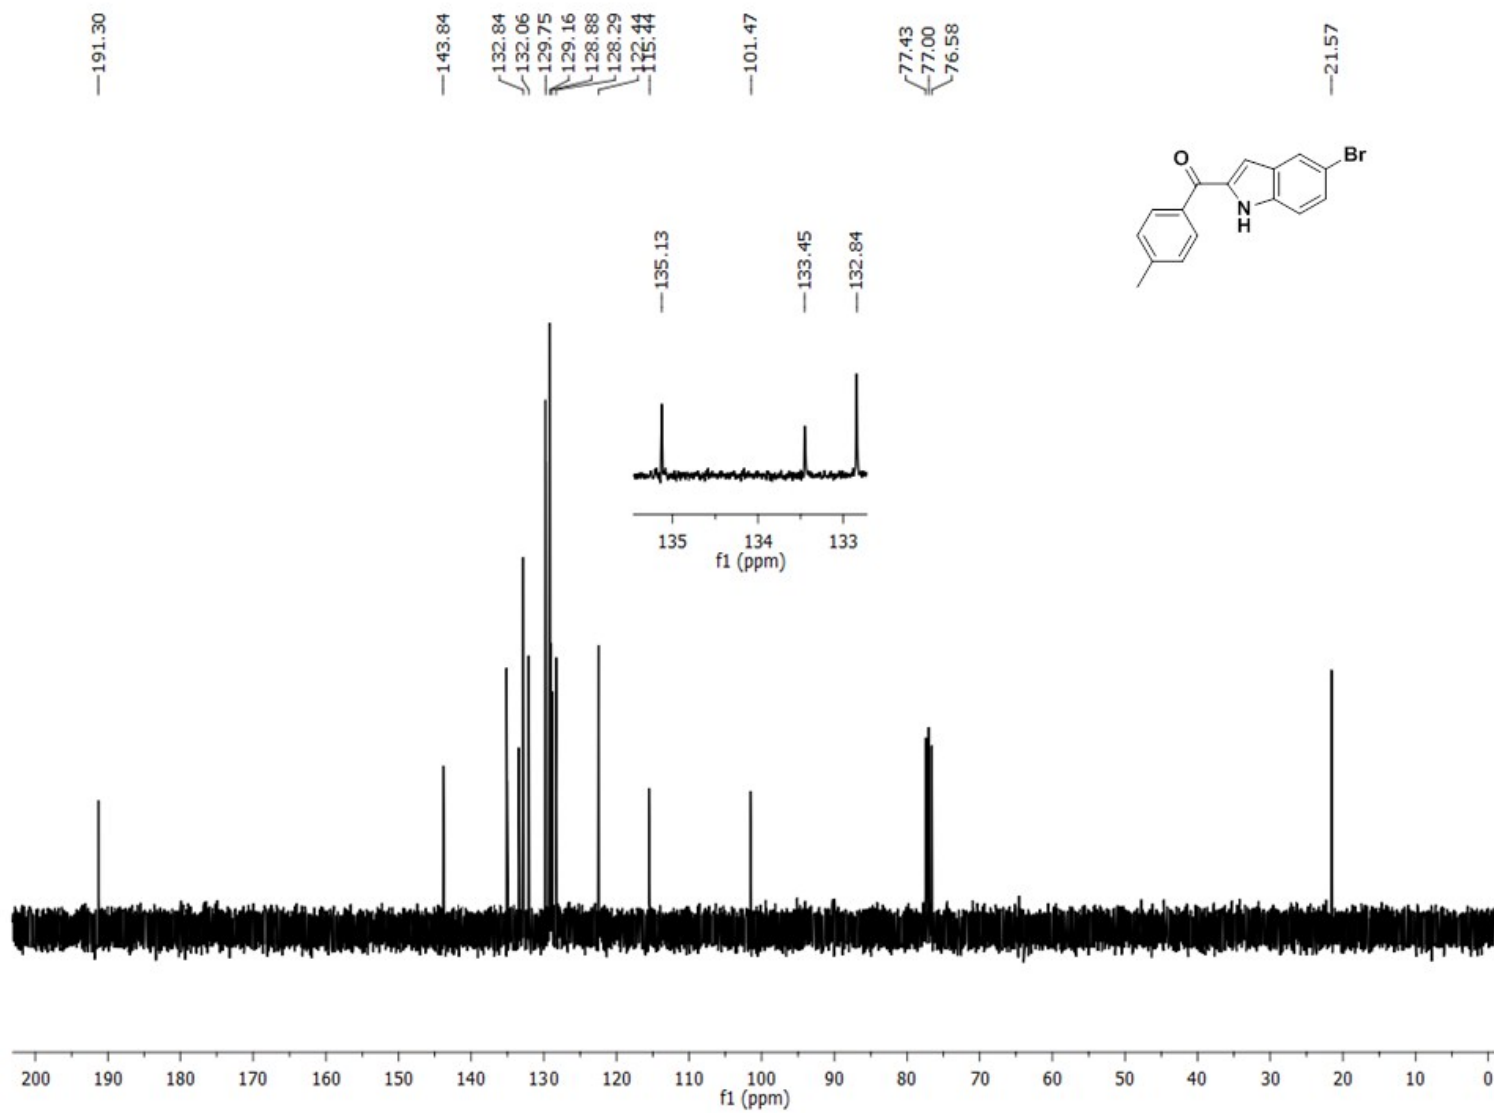

Figure 48.  $^{13}\text{C}$  NMR spectrum of compound **3i**

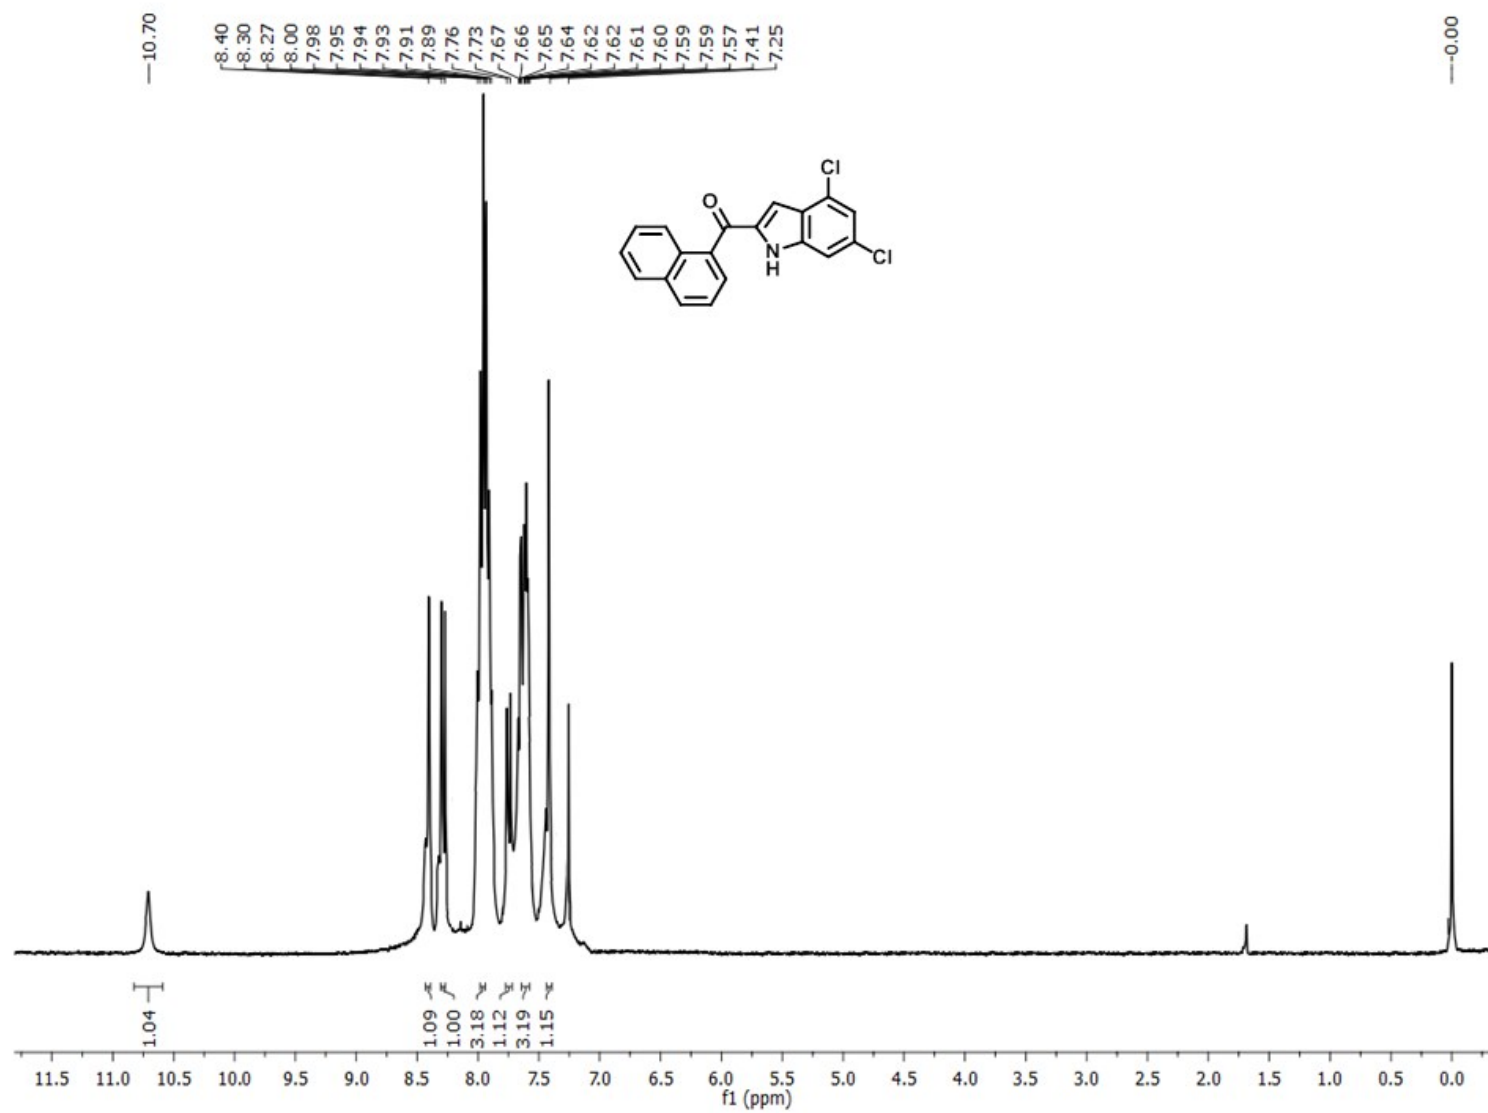

Figure 49.  $^1\text{H}$  NMR spectrum of compound **3j**



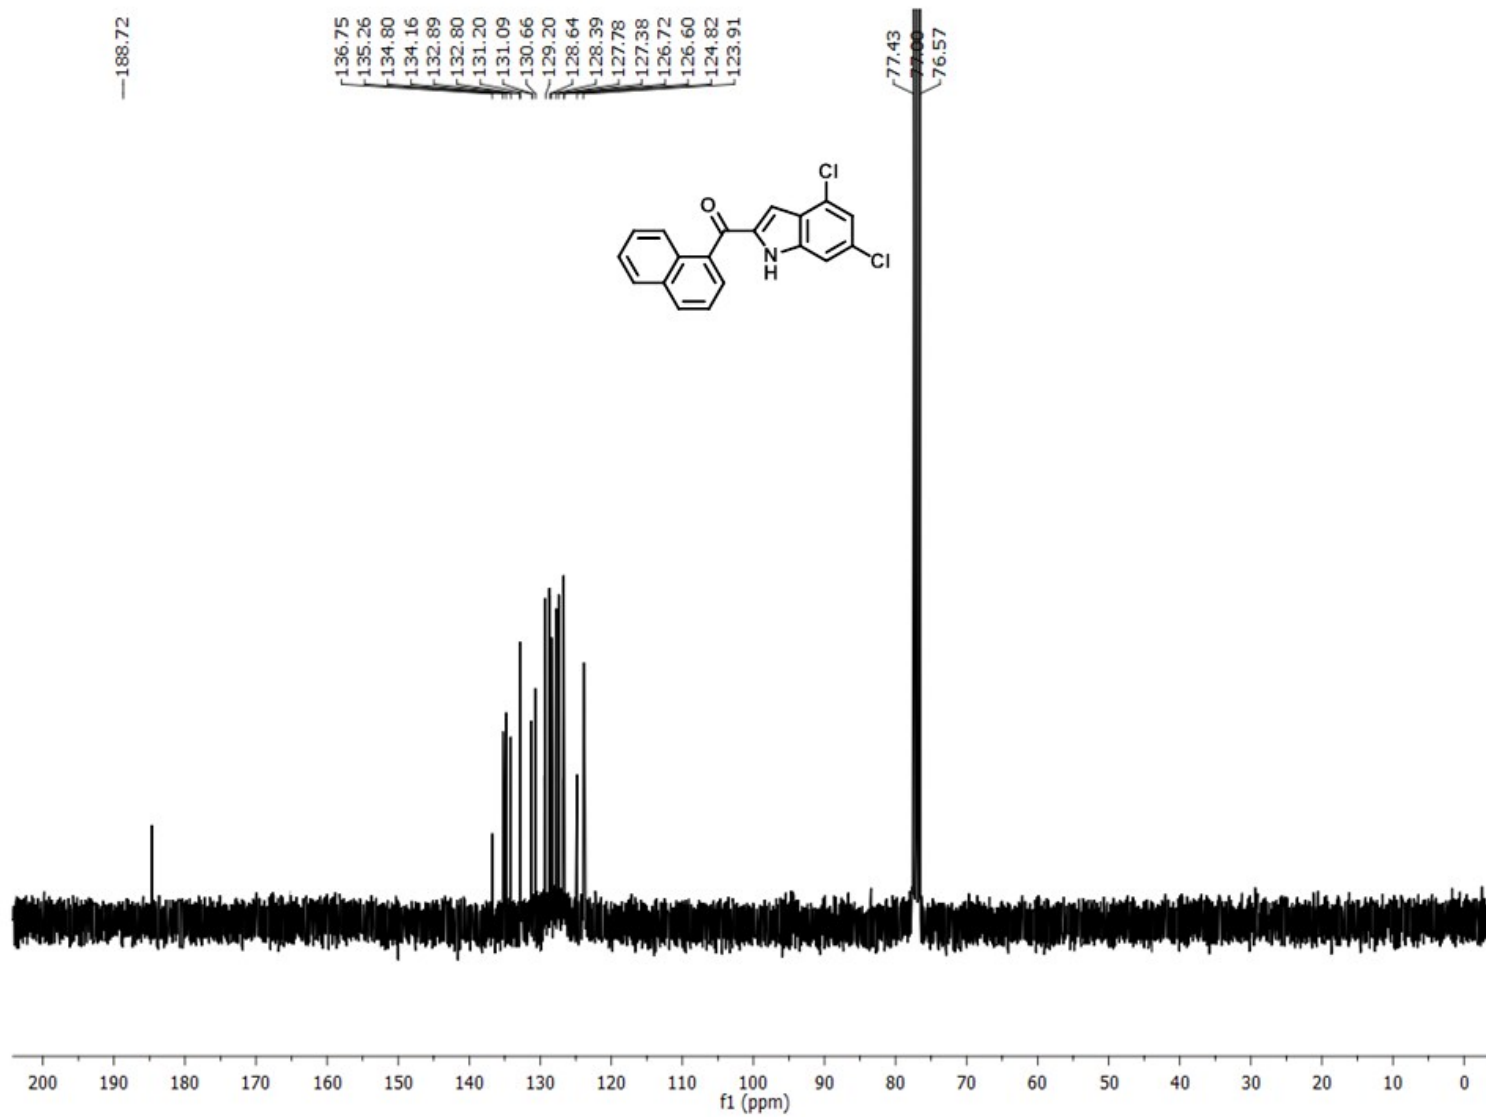

Figure 50. <sup>13</sup>C NMR spectrum of compound 3j

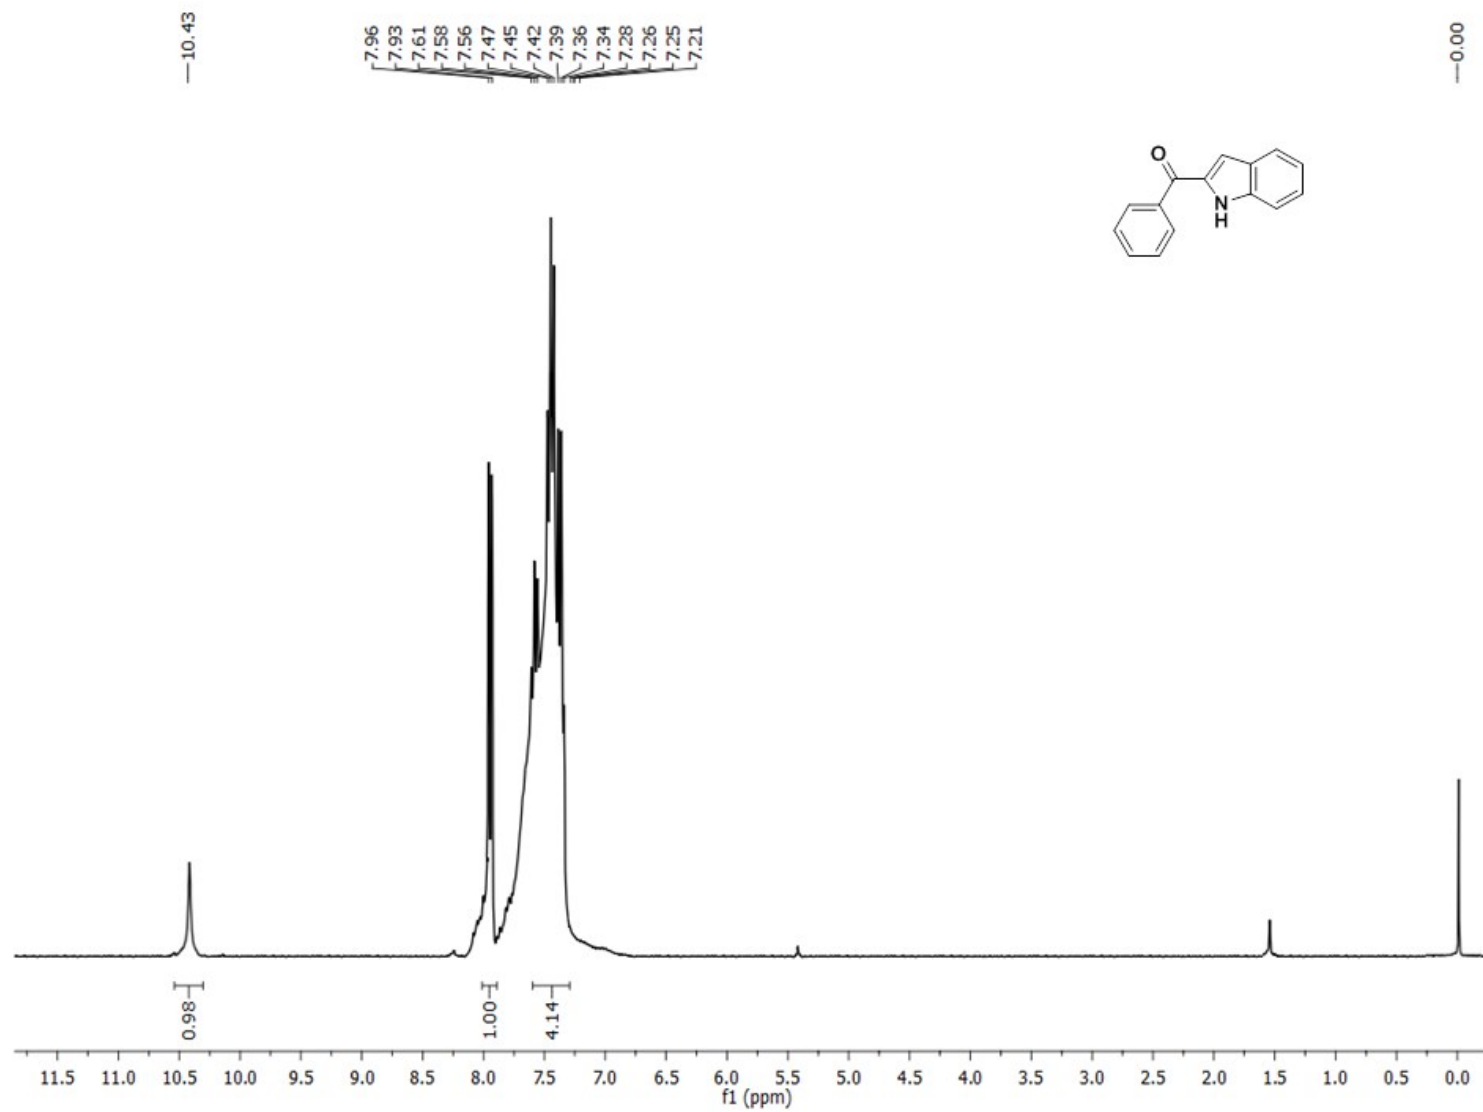

Figure 51. <sup>1</sup>H NMR spectrum of compound **3k**

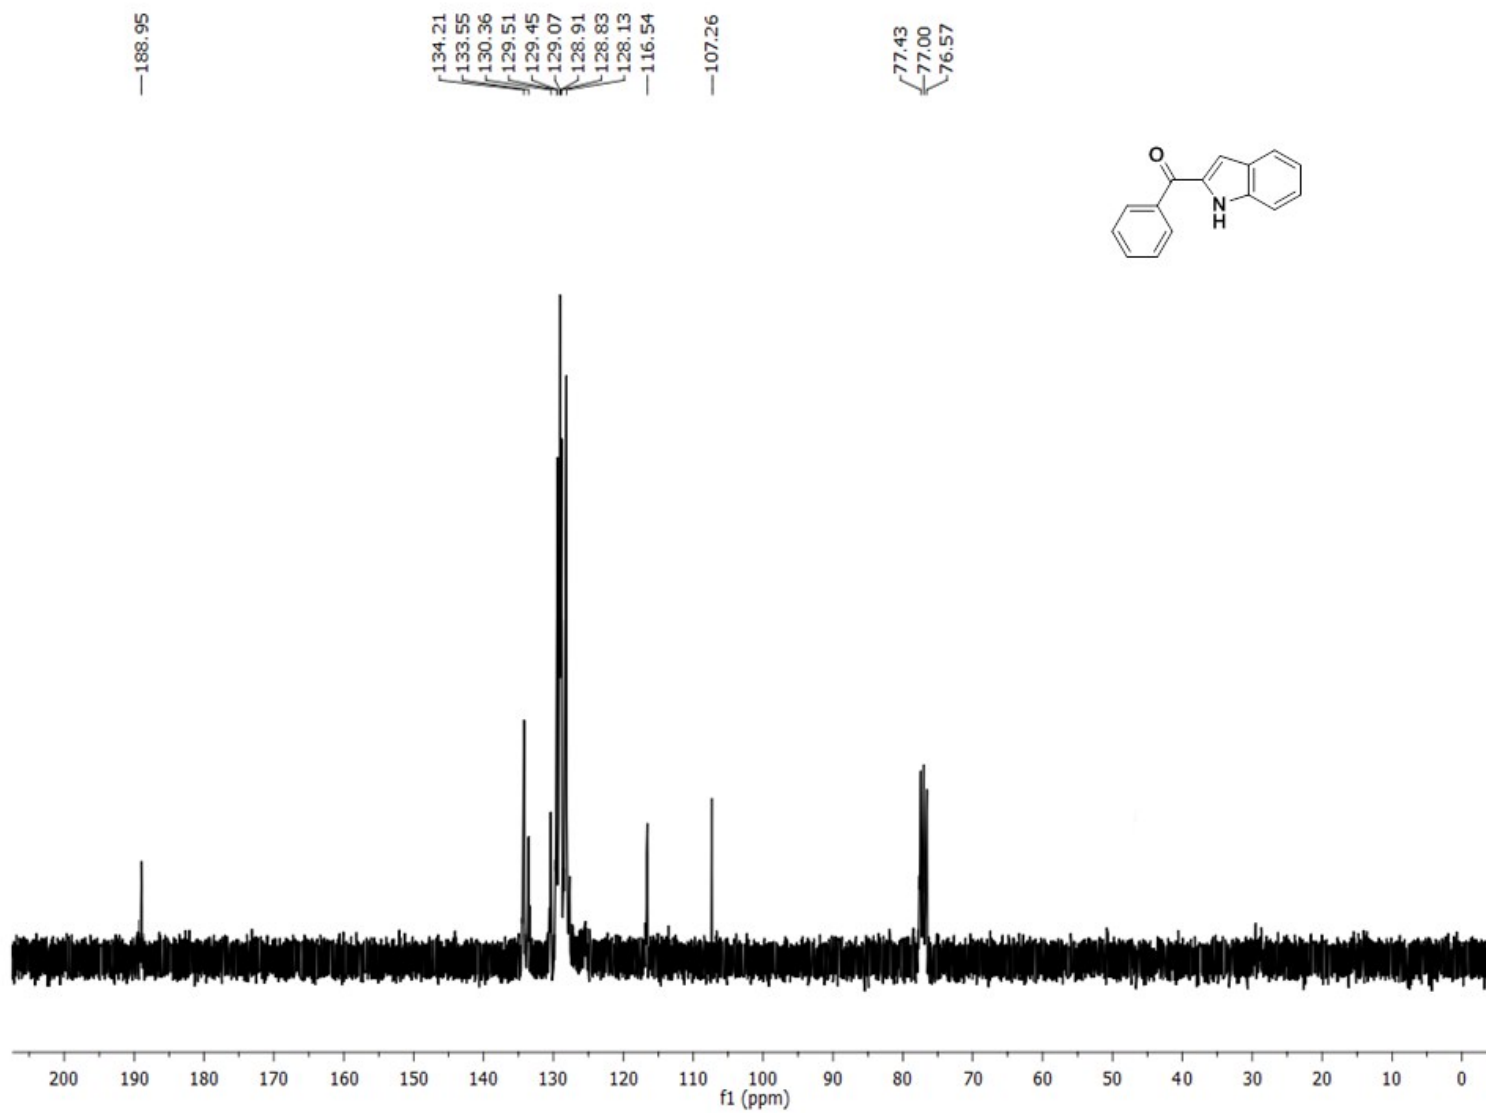

Figure 52. <sup>13</sup>C NMR spectrum of compound 3k

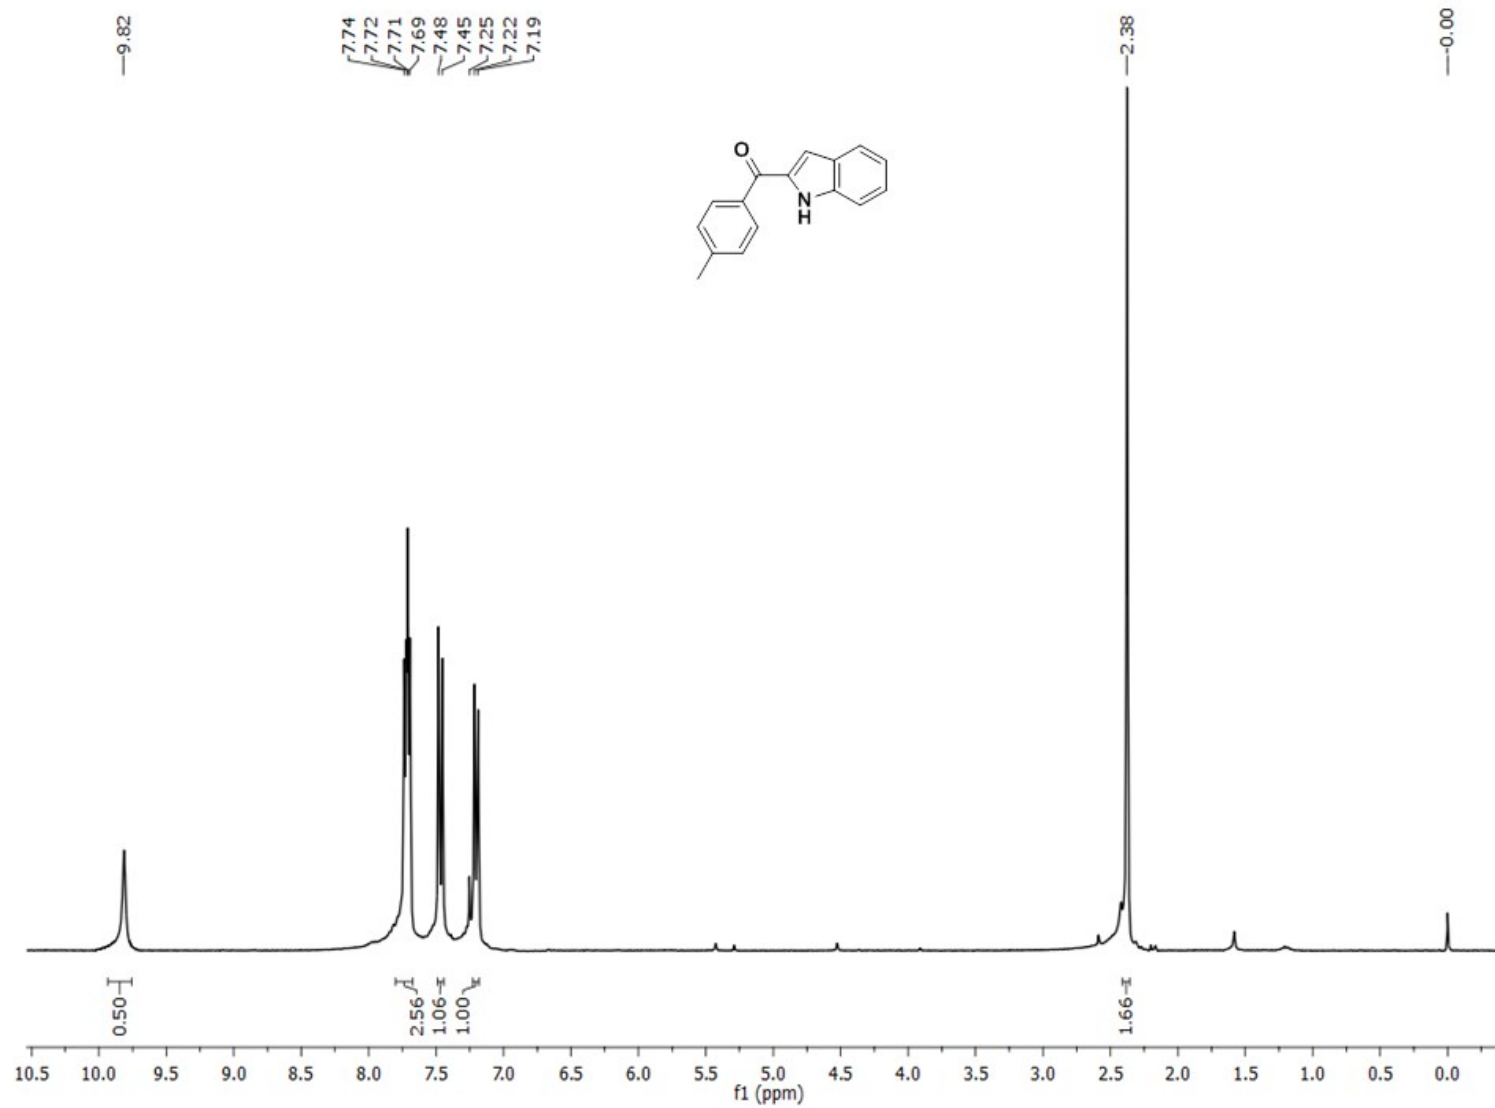

Figure 53. <sup>1</sup>H NMR spectrum of compound 31

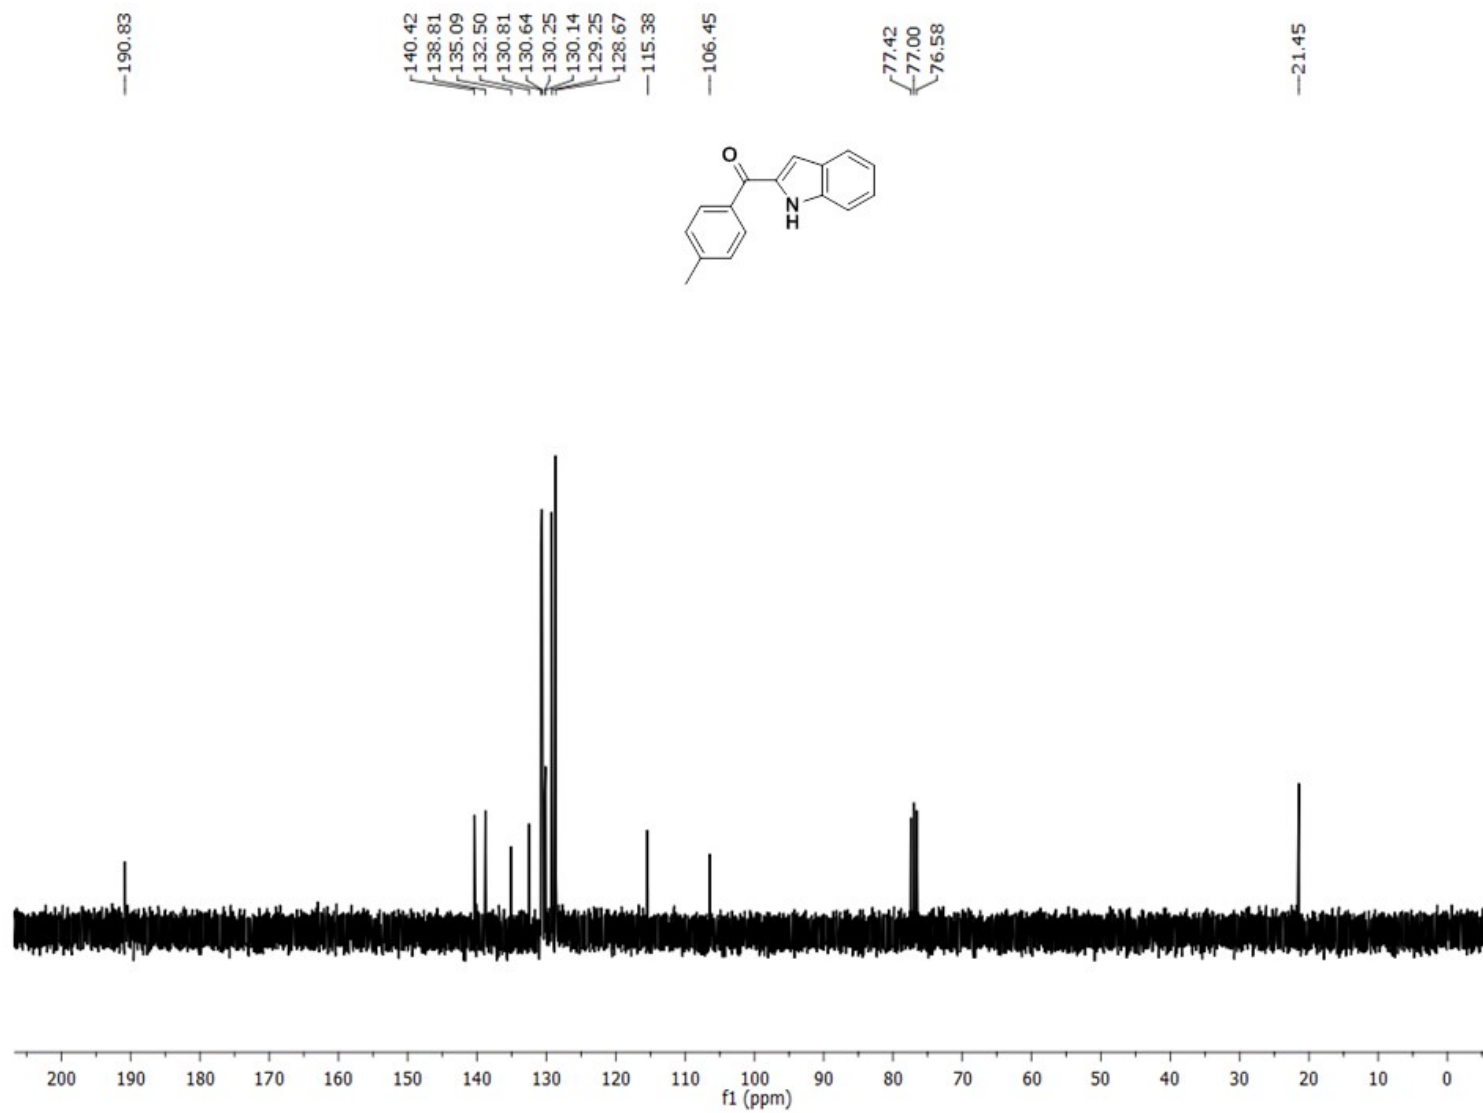

Figure 54. <sup>13</sup>C NMR spectrum of compound 31

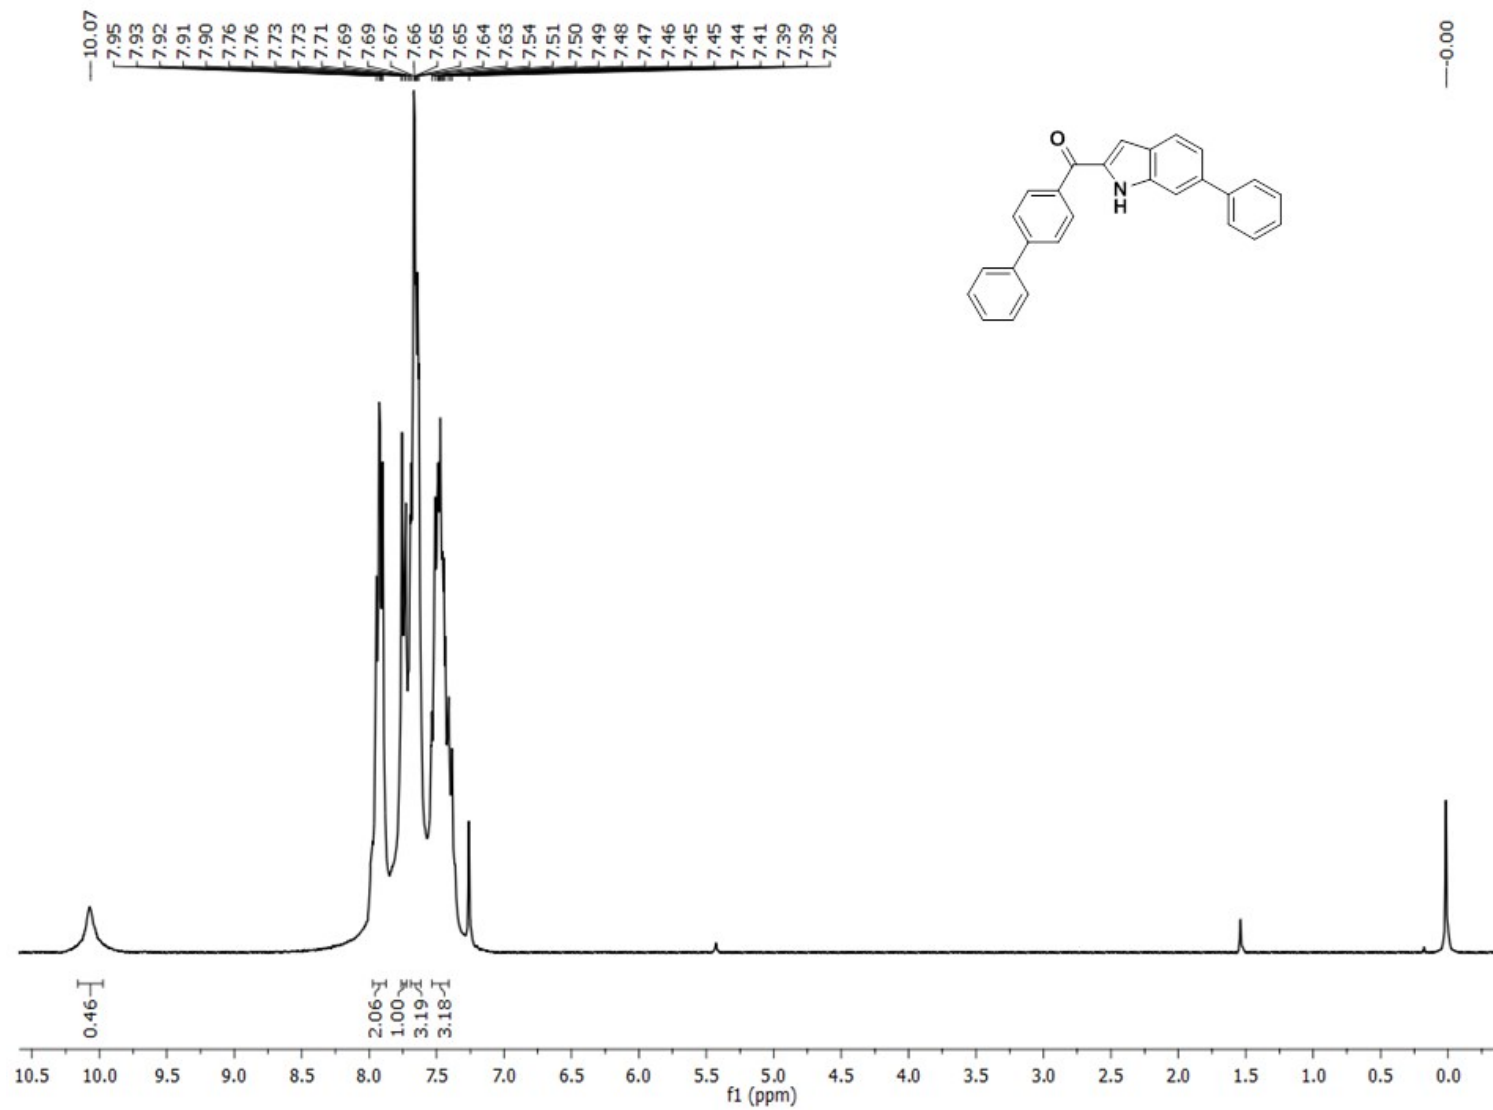

Figure 55.  $^1\text{H}$  NMR spectrum of compound **3m**

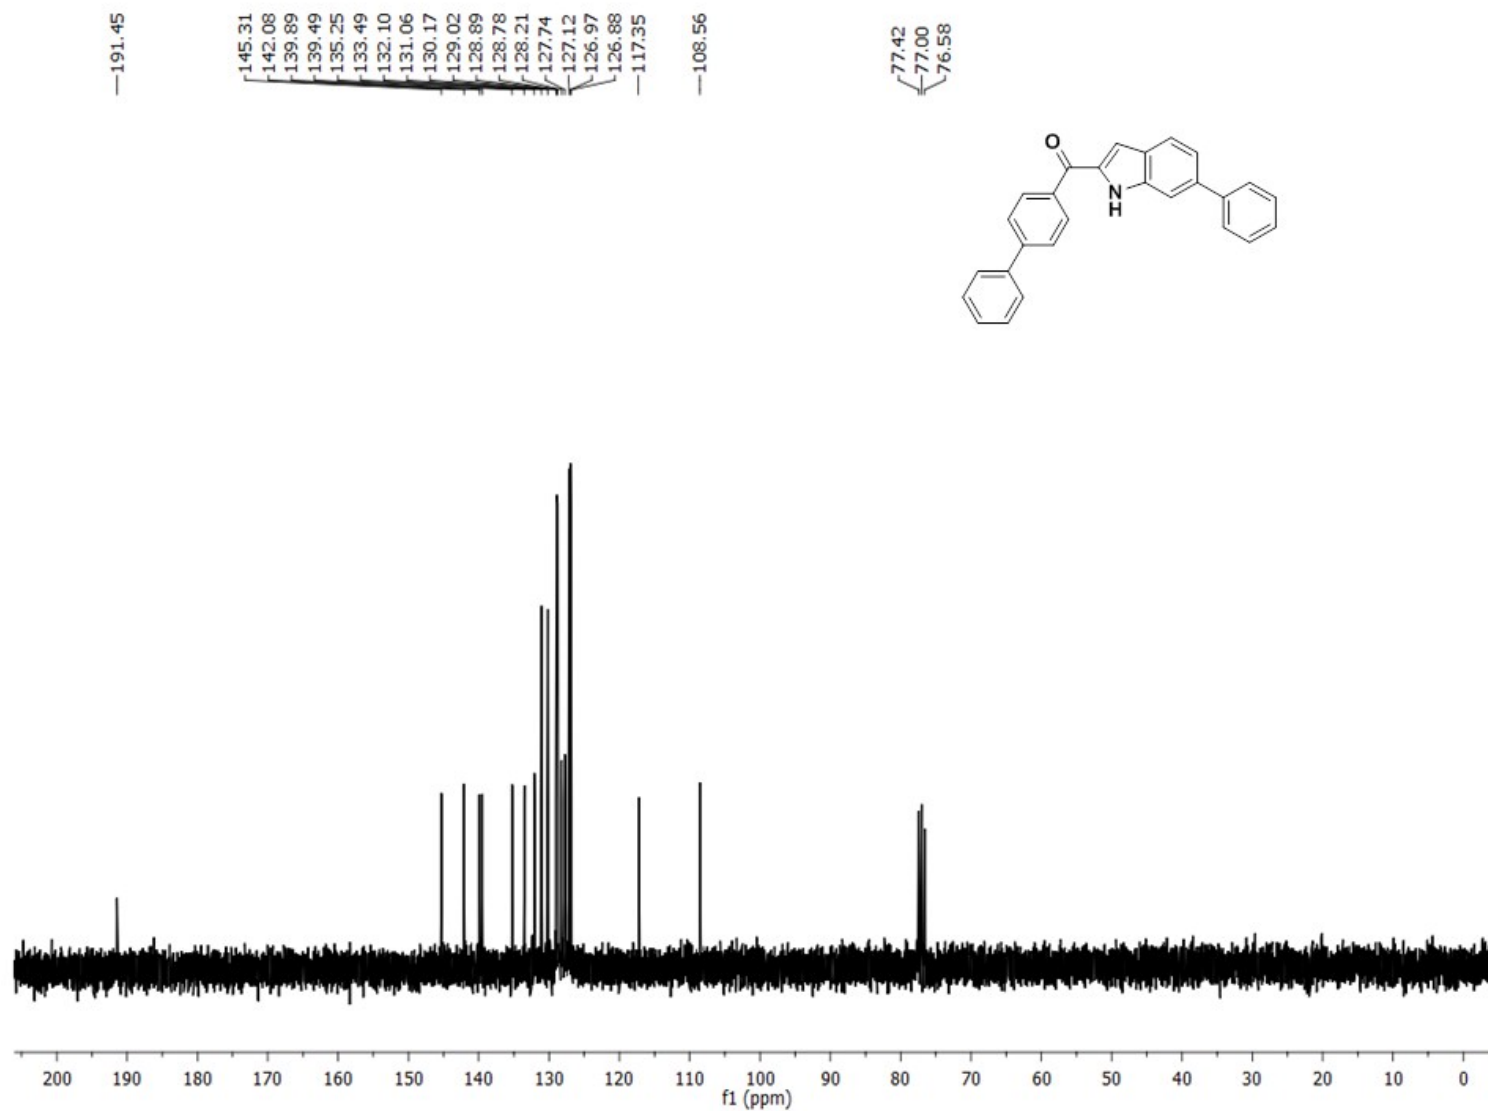

Figure 56. <sup>13</sup>C NMR spectrum of compound **3m**

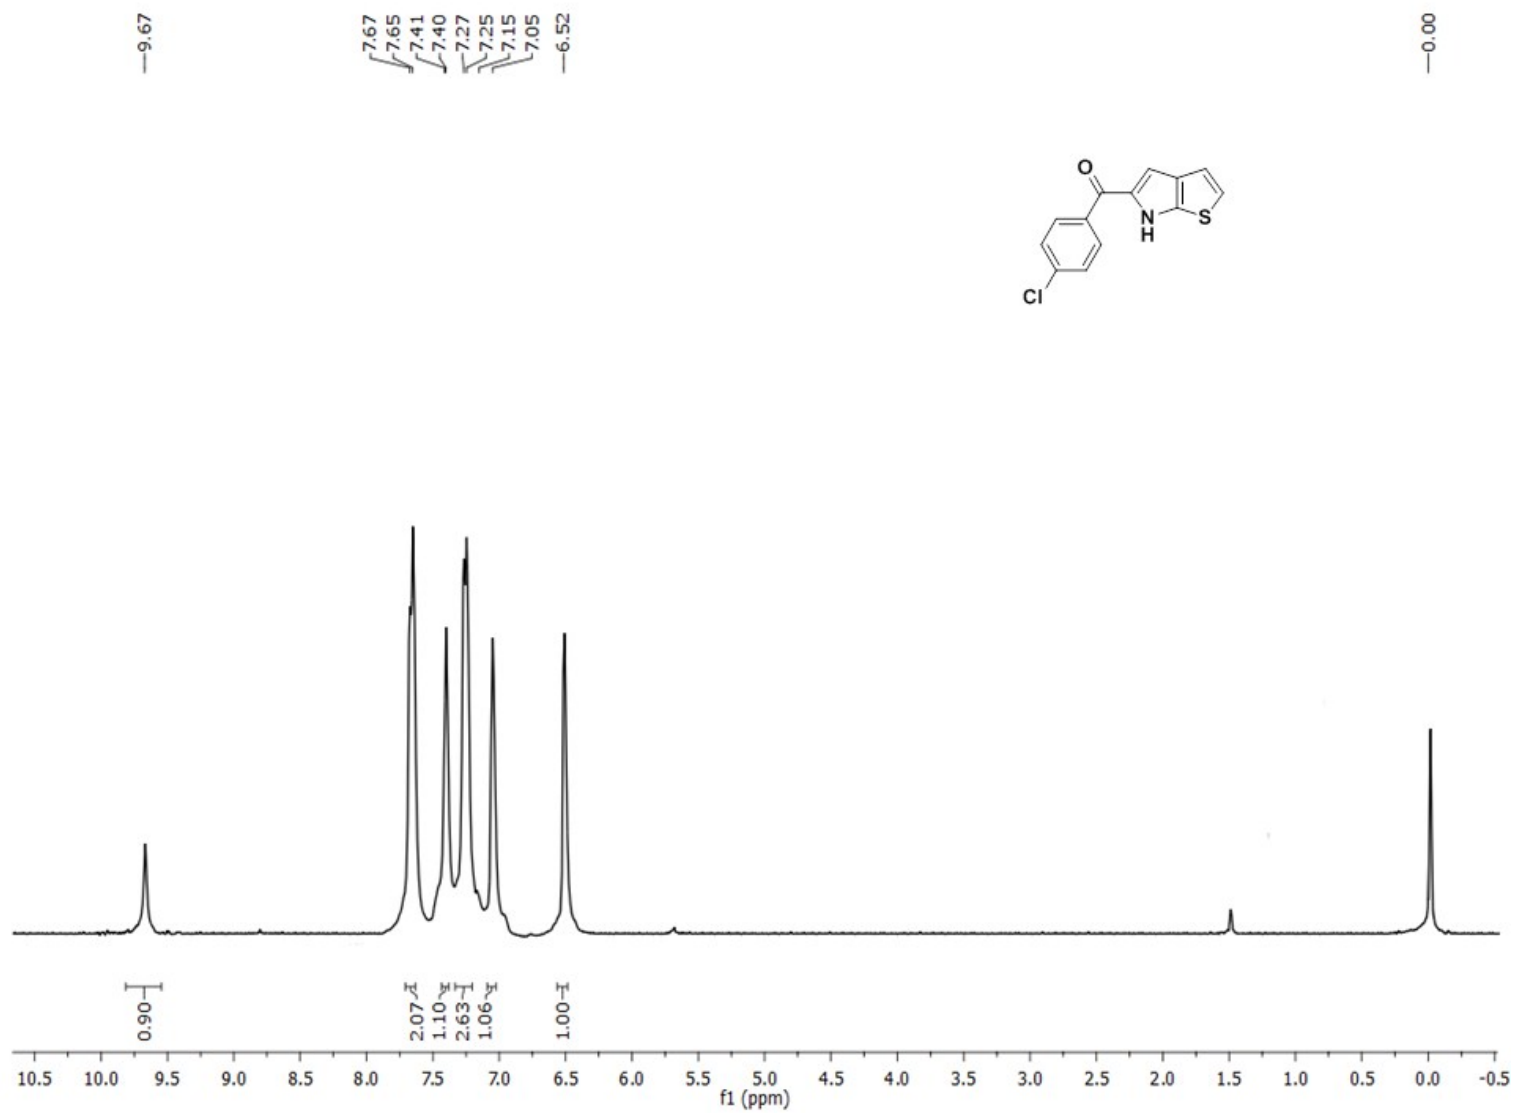

Figure 57. <sup>1</sup>H NMR spectrum of compound **3n**



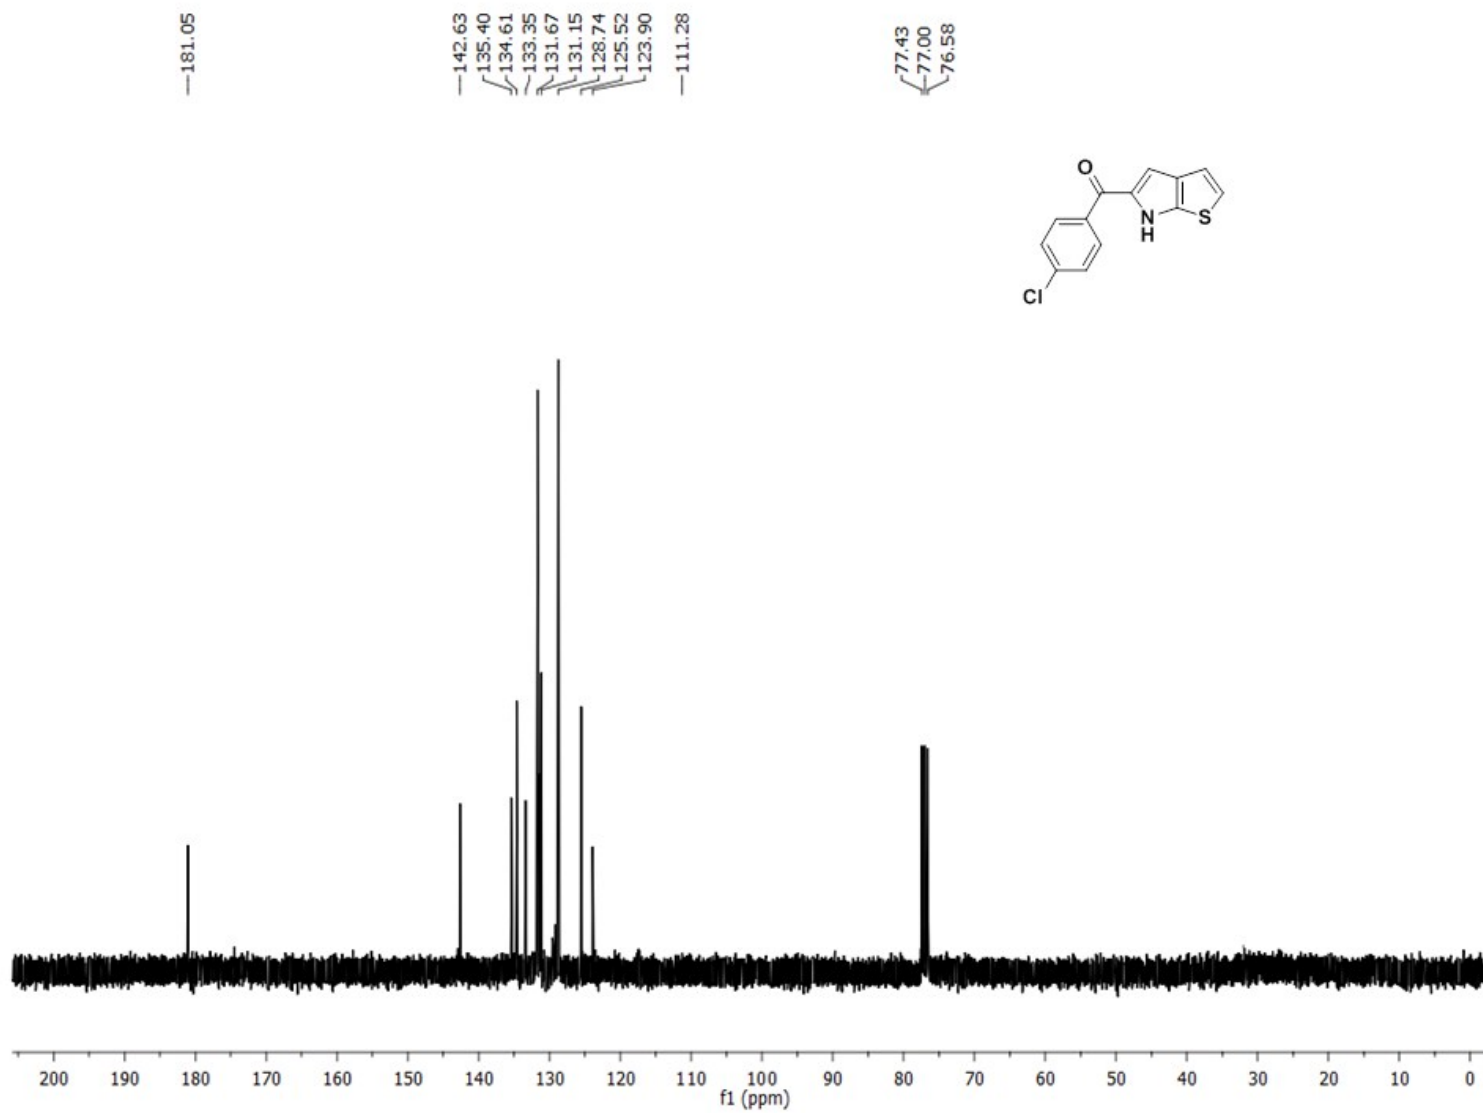

Figure 58. <sup>13</sup>C NMR spectrum of compound **3n**

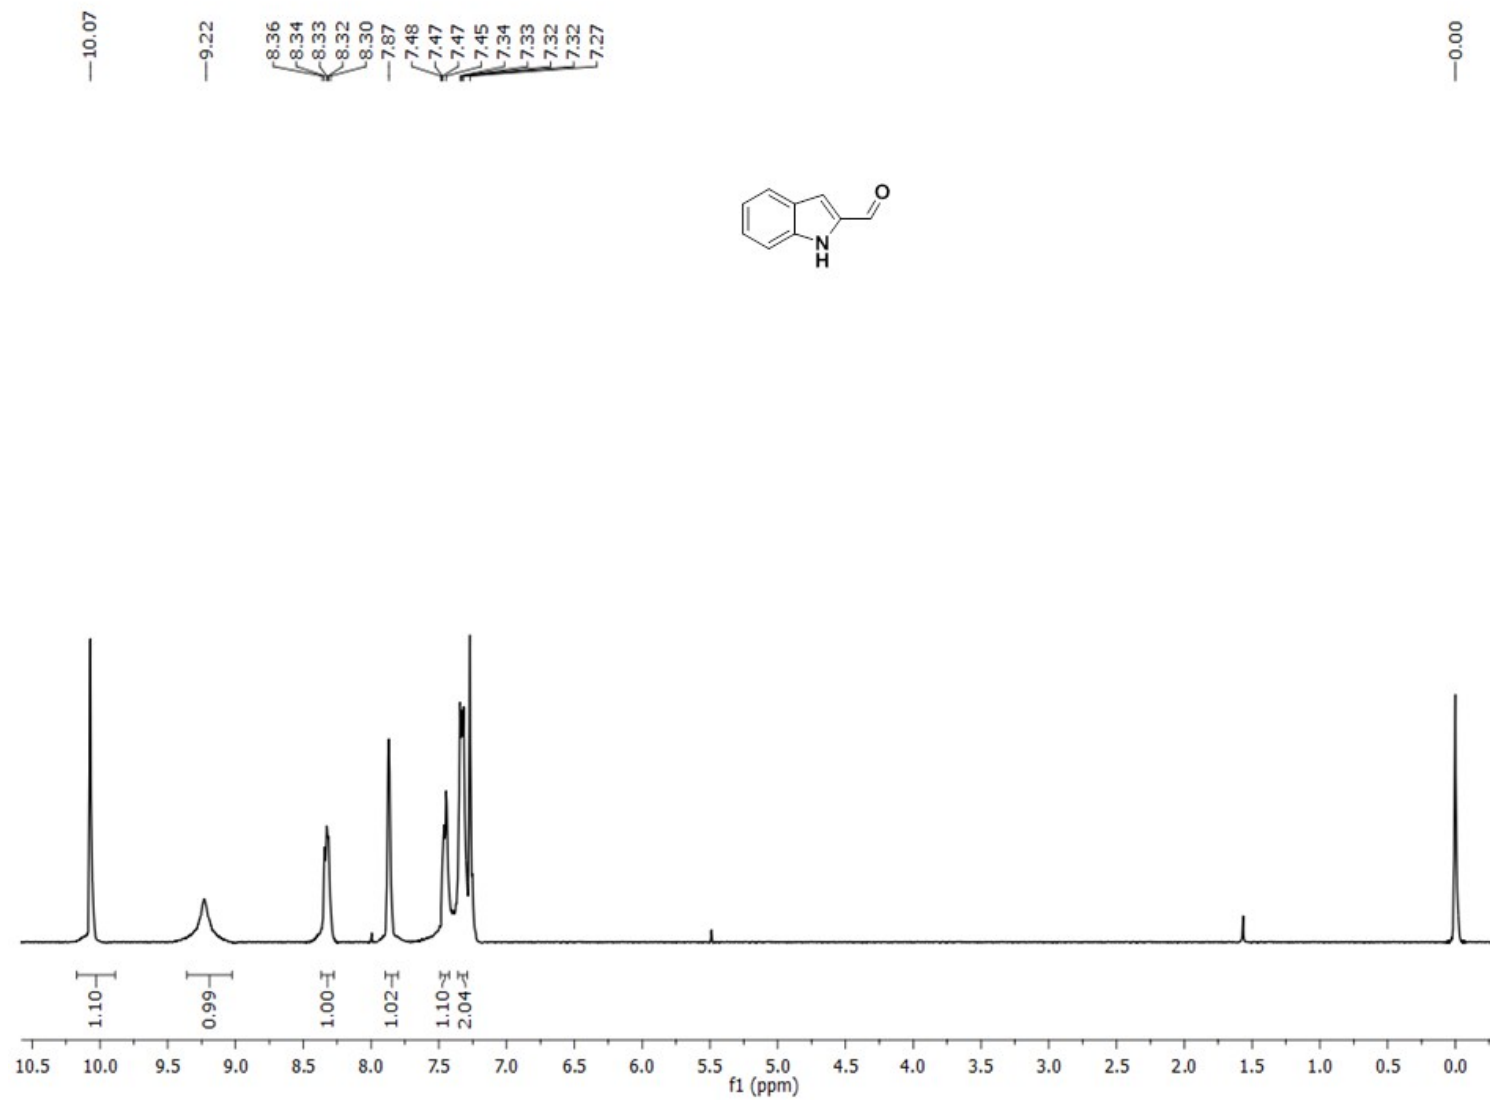

Figure 59. <sup>1</sup>H NMR spectrum of compound **3o**

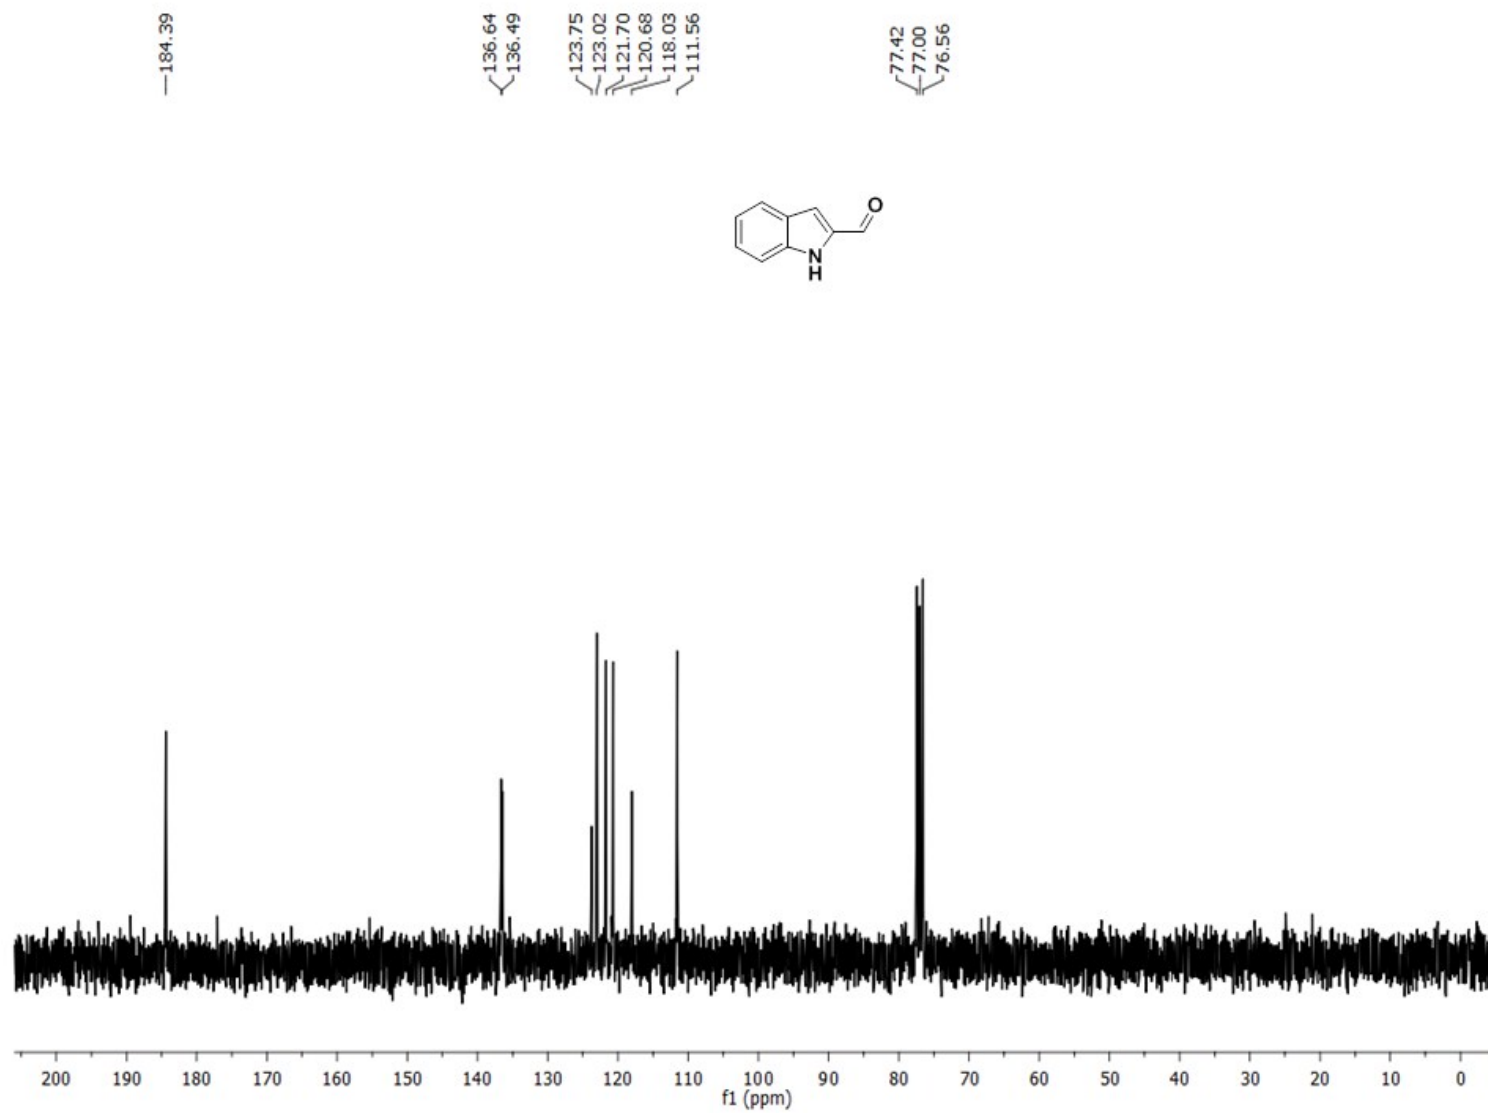

Figure 60. <sup>13</sup>C NMR spectrum of compound **3o**

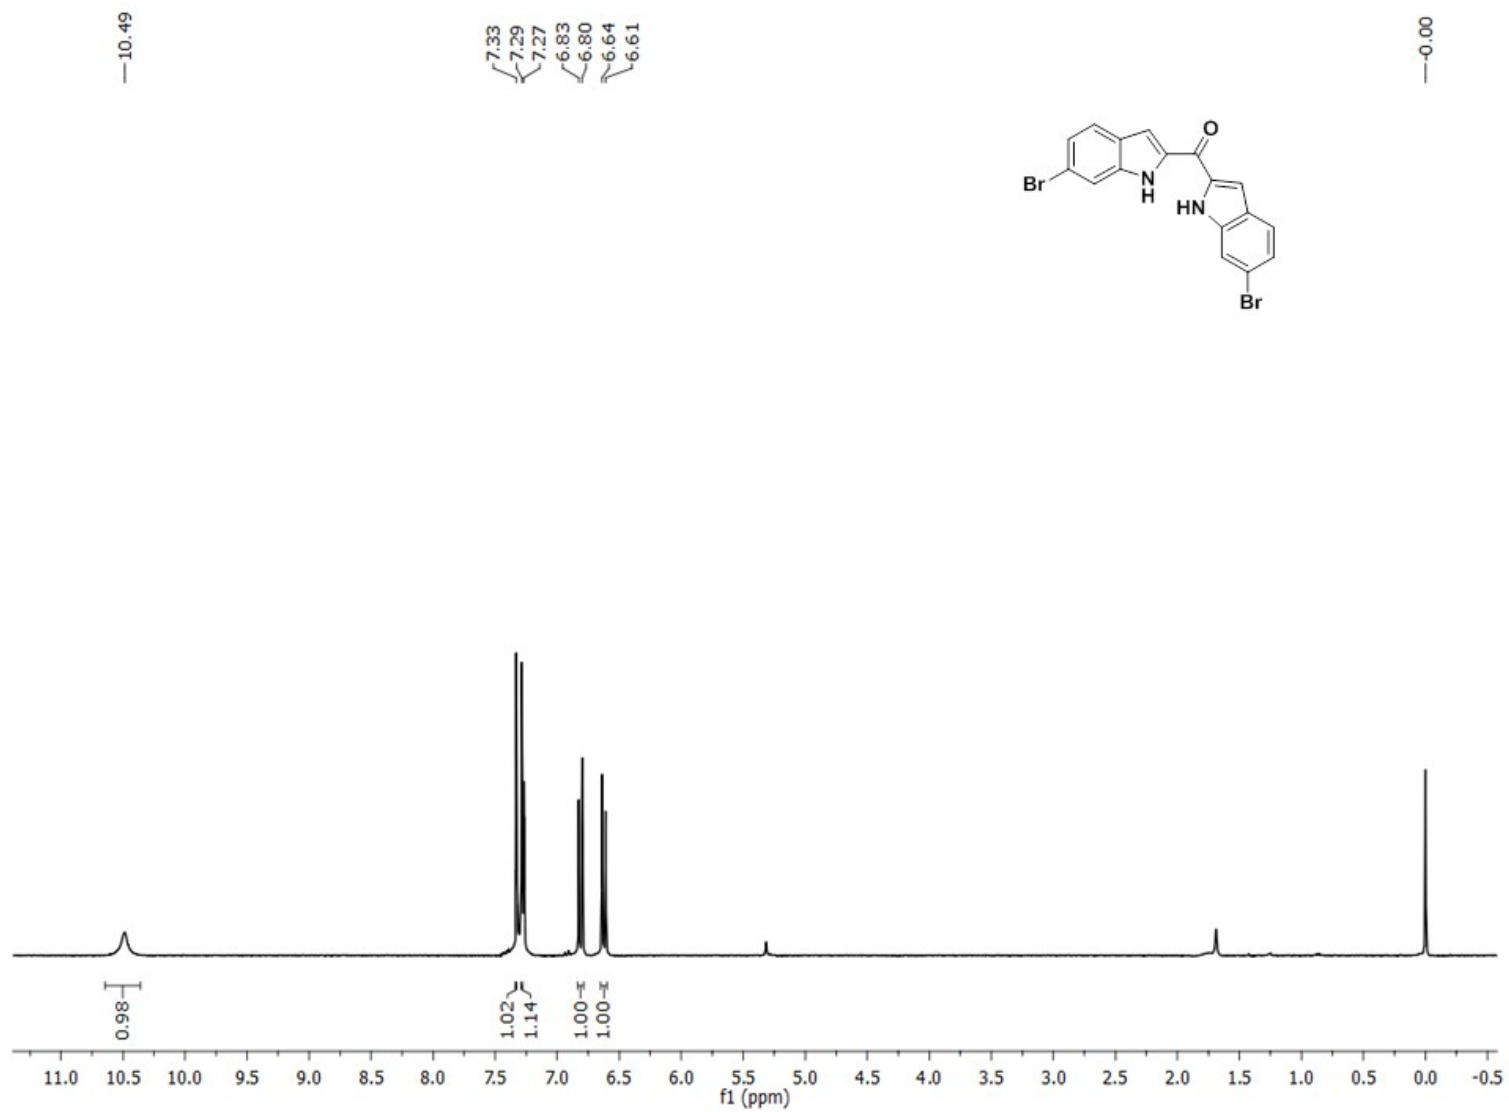

Figure 61. <sup>1</sup>H NMR spectrum of compound **3p**

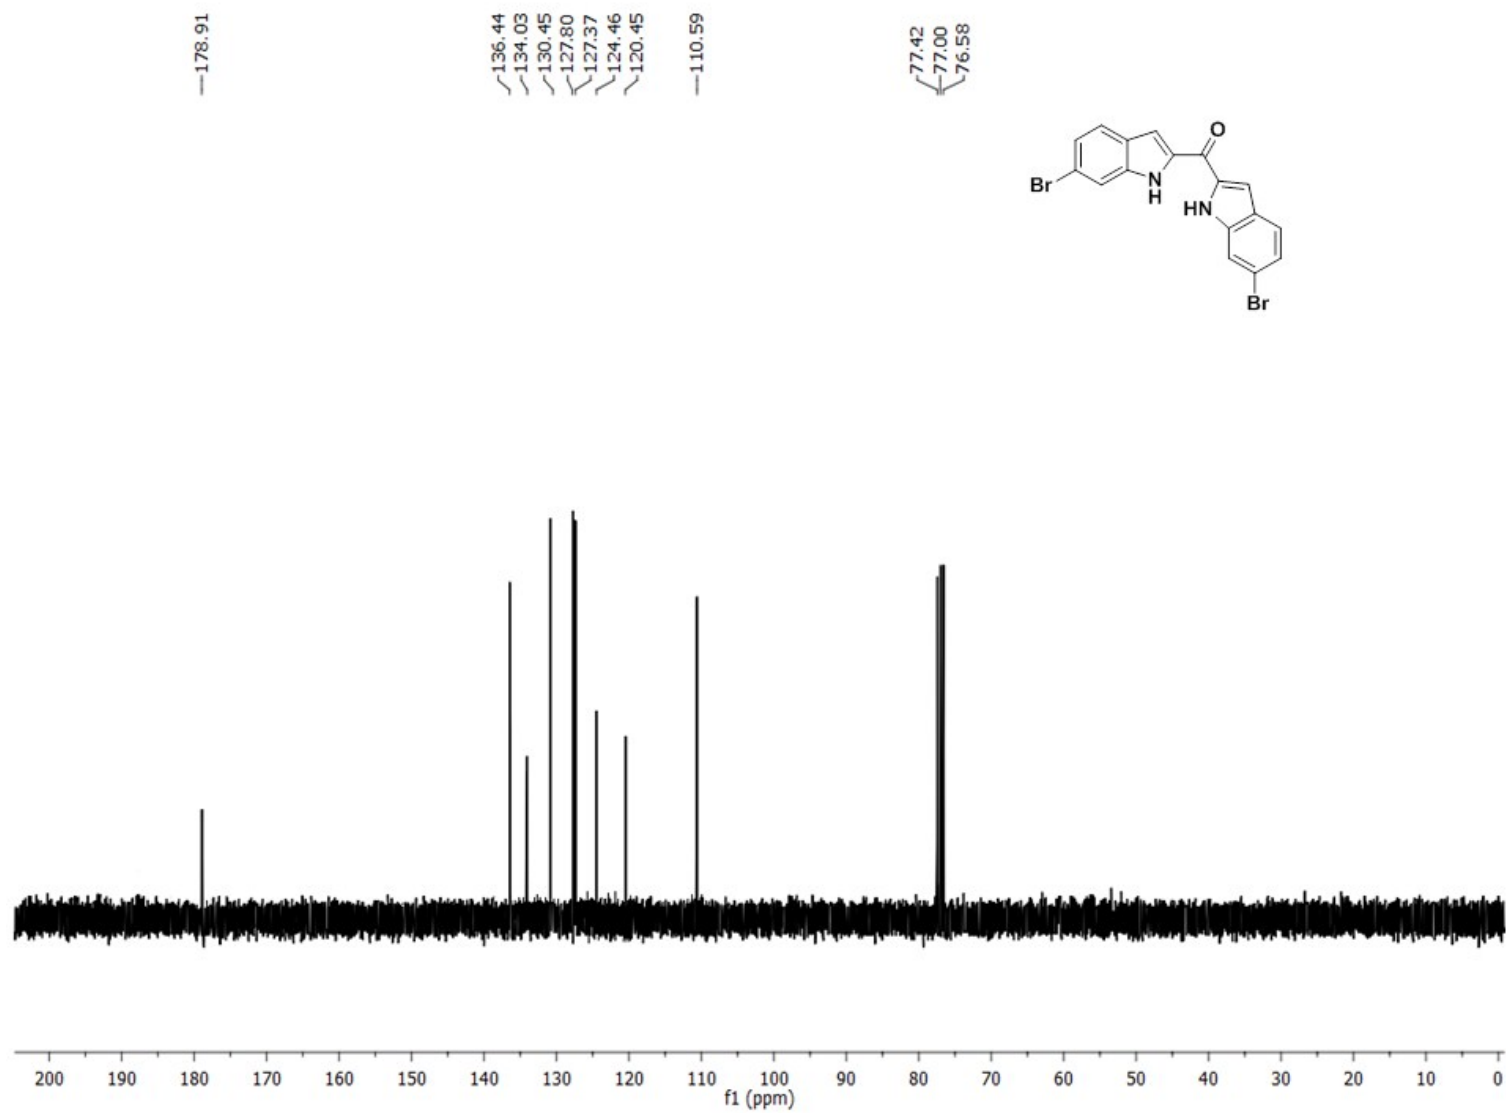

Figure 62. <sup>13</sup>C NMR spectrum of compound **3p**
